# Supplementary material for: Analysis of factors related to diabetic retinopathy in patients with newly diagnosed type 2 diabetes: a cross-sectional study
Source: PubMed Central journal article supplement — BMJ Open. 2020 Feb 10;10(2):e032095. doi: 10.1136/bmjopen-2019-032095 (PMC7044909; doi:10.1136/bmjopen-2019-032095), 2020-02-10
Supplement: bmjopen-2019-032095.draft_revisions.pdf [file bmjopen-2019-032095.draft_revisions.pdf]

# BMJ Open

BMJ Open is committed to open peer review. As part of this commitment we make the peer review history of every article we publish publicly available.

When an article is published we post the peer reviewers' comments and the authors' responses online. We also post the versions of the paper that were used during peer review. These are the versions that the peer review comments apply to.

The versions of the paper that follow are the versions that were submitted during the peer review process. They are not the versions of record or the final published versions. They should not be cited or distributed as the published version of this manuscript.

BMJ Open is an open access journal and the full, final, typeset and author-corrected version of record of the manuscript is available on our site with no access controls, subscription charges or pay-per-view fees (<http://bmjopen.bmj.com>).

If you have any questions on BMJ Open's open peer review process please email [info.bmjopen@bmj.com](mailto:info.bmjopen@bmj.com)

# BMJ Open

## **Analysis of related factors of Diabetic Retinopathy in Patients with Newly diagnosed type 2 diabetes : Heavy smoking may be an important risk factor.**

|                               |                                                                                                                                                                                                                                                                                                                                                                                                                                                                                                                                                                                                                                                                                                                                                                                                                  |
|-------------------------------|------------------------------------------------------------------------------------------------------------------------------------------------------------------------------------------------------------------------------------------------------------------------------------------------------------------------------------------------------------------------------------------------------------------------------------------------------------------------------------------------------------------------------------------------------------------------------------------------------------------------------------------------------------------------------------------------------------------------------------------------------------------------------------------------------------------|
| Journal:                      | <i>BMJ Open</i>                                                                                                                                                                                                                                                                                                                                                                                                                                                                                                                                                                                                                                                                                                                                                                                                  |
| Manuscript ID                 | bmjopen-2019-032095                                                                                                                                                                                                                                                                                                                                                                                                                                                                                                                                                                                                                                                                                                                                                                                              |
| Article Type:                 | Research                                                                                                                                                                                                                                                                                                                                                                                                                                                                                                                                                                                                                                                                                                                                                                                                         |
| Date Submitted by the Author: | 04-Jun-2019                                                                                                                                                                                                                                                                                                                                                                                                                                                                                                                                                                                                                                                                                                                                                                                                      |
| Complete List of Authors:     | Hao, Zhaohu; Tianjin Medical University, Tianjin Metabolic Diseases Hospital; Tianjin 4th Central Hospital, Metabolic Disease Management Center,<br>Huang, Xiao; Tianjin Medical University, Tianjin Metabolic Diseases Hospital<br>Qin, Yongzhang; Tianjin Medical University, Tianjin Metabolic Diseases Hospital; The First Affiliated Hospital of Gannan Medical University<br>Shao, Hailin; Tianjin 4th Central Hospital, Metabolic Disease Management Center,<br>Li, Huanming; Tianjin 4th Central Hospital, Metabolic Disease Management Center,<br>Xu, Rong; Tianjin 4th Central Hospital, Metabolic Disease Management Center,<br>Chang, Baocheng; Tianjin Medical University, Tianjin Metabolic Diseases Hospital<br>Tian, Fengshi; Tianjin 4th Central Hospital, Metabolic Disease Management Center, |
| Keywords:                     | Smoking index, Diabetic retinopathy < DIABETES & ENDOCRINOLOGY, Type 2 diabetes mellitus, newly diagnosed diabetes mellitus                                                                                                                                                                                                                                                                                                                                                                                                                                                                                                                                                                                                                                                                                      |
|                               |                                                                                                                                                                                                                                                                                                                                                                                                                                                                                                                                                                                                                                                                                                                                                                                                                  |

SCHOLARONE™  
Manuscripts

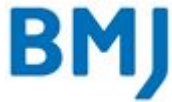

I, the Submitting Author has the right to grant and does grant on behalf of all authors of the Work (as defined in the below author licence), an exclusive licence and/or a non-exclusive licence for contributions from authors who are: i) UK Crown employees; ii) where BMJ has agreed a CC-BY licence shall apply, and/or iii) in accordance with the terms applicable for US Federal Government officers or employees acting as part of their official duties; on a worldwide, perpetual, irrevocable, royalty-free basis to BMJ Publishing Group Ltd ("BMJ") its licensees and where the relevant Journal is co-owned by BMJ to the co-owners of the Journal, to publish the Work in this journal and any other BMJ products and to exploit all rights, as set out in our [licence](#).

The Submitting Author accepts and understands that any supply made under these terms is made by BMJ to the Submitting Author unless you are acting as an employee on behalf of your employer or a postgraduate student of an affiliated institution which is paying any applicable article publishing charge ("APC") for Open Access articles. Where the Submitting Author wishes to make the Work available on an Open Access basis (and intends to pay the relevant APC), the terms of reuse of such Open Access shall be governed by a Creative Commons licence – details of these licences and which [Creative Commons](#) licence will apply to this Work are set out in our licence referred to above.

Other than as permitted in any relevant BMJ Author's Self Archiving Policies, I confirm this Work has not been accepted for publication elsewhere, is not being considered for publication elsewhere and does not duplicate material already published. I confirm all authors consent to publication of this Work and authorise the granting of this licence.

1  
2  
3  
4 **Analysis of related factors of Diabetic Retinopathy in Patients with Newly diagnosed type 2**  
5 **diabetes: Heavy smoking may be an important risk factor. (words 2470, tables 4, figures 2)**  
6

7 Zhaohu Hao<sup>1,2\*</sup> MD, Xiao Huang<sup>1\*</sup> RN, Yongzhang Qin<sup>1,3\*</sup>, Hailin Shao<sup>2\*</sup> MD, Huanming Li<sup>2\*</sup>  
8 MD, Rong Xu<sup>2</sup> MD, Baocheng Chang<sup>1 §</sup> MD, Fengshi Tian<sup>2 §</sup> MD.  
9

10 Author Affiliations:

11  
12  
13 1 NHC Key Laboratory of Hormones and Development (Tianjin Medical University), Tianjin Key  
14 Laboratory of Metabolic Diseases, Tianjin Metabolic Diseases Hospital & Tianjin Institute of  
15 Endocrinology, Tianjin Medical University, 300070 Tianjin, China  
16

17  
18 2 Department of Metabolic Disease Management Center, Tianjin 4th Central Hospital, The 4th  
19 Central Hospital Affiliated to Nankai University, The 4th Center Clinical College of Tianjin Medical  
20 University, 300140 Tianjin, China  
21

22  
23 3 Department of Endocrinology, The First Affiliated Hospital of Gannan Medical University,  
24 341000 Ganzhou, China  
25

26  
27 \*These authors contributed equally and are co-first authors of this article.  
28

29  
30 § Corresponding author: Prof Baocheng Chang, NHC Key Laboratory of Hormones and  
31 Development (Tianjin Medical University), Tianjin Key Laboratory of Metabolic Diseases, Tianjin  
32 Metabolic Diseases Hospital & Tianjin Institute of Endocrinology, Tianjin Medical University,  
33 300070 Tianjin, China; Prof Fengshi Tian, Department of Metabolic Disease Management Center,  
34 Tianjin 4th Central Hospital, The 4th Central Hospital Affiliated to Nankai University, The 4th  
35 Center Clinical College of Tianjin Medical University, No.1 Zhongshan Road, Tianjin 300140, China  
36  
37  
38

39  
40 Tel: +86- 02226249403; +86- 02226249281  
41

42  
43 E-mail: Changbaocheng2019@163.com; [Tianfengshi20198@sohu.com](mailto:Tianfengshi20198@sohu.com)  
44  
45  
46

47 **Abstract**

48  
49 **Background:** Cigarette smoking is a known risk factor for many diseases, including various kinds  
50 of cancer and cardiovascular diseases. 20% of newly diagnosed type 2 diabetic (T2DM) patients  
51 are diagnosed with DR. The explanation of this phenomenon is often that the onset of T2DM is  
52 insidious, and patients may have a long history before diagnosis. We investigated the related  
53 factors of DR, and explore the correlation between smoking and DR in patients with newly  
54 diagnosed type 2 diabetes who visited in the hospital from December 2018 to April 2019.  
55  
56  
57  
58  
59  
60

1  
2  
3  
4 **Methods:** Finally 947 patients enrolled in the study. According to whether they were diagnosed  
5 with DR, patients were divided into two groups (diabetic retinopathy group and non-diabetic  
6 retinopathy group). Calculate smoking index and assess smoking severity. The factors such as  
7 sex, age, hypertension, proportion of patients with DM diagnosed age <40 years old, family  
8 history of diabetes, drinking history, HbA1c, BMI and smoking status were compared between  
9 two groups, and logistic regression was used on analyzing the relationship between DR and the  
10 factors above.  
11  
12  
13

14 **Results:** There was no statistically significant difference between two groups in sex, age,  
15 hypertension, proportion of patients with DM diagnosed age <40 years old, family history of  
16 diabetes, drinking history and HbA1c. BMI was significantly higher in DR patients( $27.7 \pm 4.2$  vs  $26.7$   
17  $\pm 4.4$ ,  $p=0.004$ ). Smoking status was different between the two groups( $\chi^2=6.350$ ,  $p=0.042$ ). BMI  
18 is a related factor for DR in newly diagnosed diabetic patients (OR=0.634,  $p=0.012$ ) by logistic  
19 regression analysis. When BMI was  $\geq 28$  kg/m<sup>2</sup>, heavy smoking was significantly associated with  
20 DR(OR=2.336,  $p=0.027$ ).  
21  
22  
23  
24

25 **Conclusions:** Heavy smoking is an independent risk factor for DR in patients with newly  
26 diagnosed DM. And higher smoking amount also maybe a risk factor of getting DR. Therefore, to  
27 elucidate the correlation clearly, we need to do a long-term cohort study with large sample to  
28 confirm.  
29  
30  
31

32  
33 **Keywords:** Smoking index, Type 2 diabetes mellitus, Diabetic retinopathy, newly diagnosed  
34 diabetes mellitus.  
35

### 36 **Strengths and limitations of this study**

37  
38  
39 Current studys on the effect of smoking on diabetic retinopathy have been inconsistent.

40  
41 20% of newly diagnosed type 2 diabetes mellitus(T2DM) are diagnosed with diabetic  
42 retinopathy(DR). The explanation is that the onset of T2DM is usually insidious, and many  
43 patients with diabetes have been suffering from diabetes for years before being diagnosed.  
44 There are few studies on the factors related to DR in newly diagnosed type 2 diabetes patients.  
45  
46

47  
48 Unlike most other studies, we firstly evaluated the effect of smoking on diabetic retinopathy  
49 according to smoking index in newly diagnosed diabetic patients. We found that heavy smoking  
50 may be a risk factor for DR in patients with newly diagnosed diabetes with obesity(OR=2.336,  
51  $p=0.027$ ).  
52  
53

54  
55 Although our department is responsible for the first diagnosis and identification of diabetes in  
56 Tianjin, it is still unable to timely diagnose those patients who just got diabetes.  
57  
58

## 1. Introduction

Diabetes mellitus (DM) is a chronic metabolic disease characterized by hyperglycemia caused by various etiologies, and the incidence is increasing year by year worldwide. According to the report of the International Diabetes Federation (IDF) in 2017 about 425 million people were affected by DM, and the number of the patients is expected to reach 629 million by 2045<sup>[1]</sup>. China was the country with the highest number of diabetes patients, and the prevalence has increased from 0.67% in 1980 to 10.4% in 2013<sup>[2]</sup>. A meta-analysis based epidemiological studies conducted from 35 research centers around the world showed that the prevalence of diabetic retinopathy (DR) was 35.4%<sup>[3]</sup>. DR is a highly specific microvascular complication caused by diabetes, and its prevalence is significantly correlated with the course of DM and blood glucose levels<sup>[4]</sup>. DR is the most important reason of irreversible blindness in working-age adults. Chronic hyperglycemia causes not only retinal vascular diseases, but also leads to damage of retinal neurons, both of those two factors above lead to vision loss<sup>[5]</sup>. 20%<sup>[3]</sup> of newly diagnosed type 2 diabetic (T2DM) patients are diagnosed with DR. The explanation of this phenomenon is often that the onset of T2DM is insidious, and patients may have a long history before diagnosis. Are there any other risk factors for DR in these newly diagnosed patients? There is no relevant research report at present.

Smoking is harmful and it's also an important risk factor for cardiovascular diseases, cerebrovascular diseases, respiratory diseases and malignant tumors. Smoking is one of the most serious public health issues across the world and it is responsible for about 7 million deaths worldwide per year<sup>[6]</sup>. In a 14-year prospective cohort study Jee SH found that people smoking more than 20 cigarettes a day had a 1.55-fold higher incidence of diabetes than a non-smoker<sup>[7]</sup>. We all know that smoking is harmful, and smoking may cause the presence of protein in the urine increasing. We all expect that smoking has a promoting effect on DR, but we have no direct clinical epidemiological evidence that smoking has an effect on DR in these newly diagnosed patients<sup>[8]</sup>. Many diabetic patients have started smoking before they diagnosed with diabetes. Does smoking contribute to the complications of DR in newly diagnosed patients? Little research has been done on the relationship between smoking and DR in newly diagnosed diabetic patients. In our present research, we investigated the related factors of DR, and explore the correlation between smoking and DR in patients with newly diagnosed type 2 diabetes who visited in the hospital from December 2018 to April 2019.

## 2. Research design and methods

### 2.1. Participants

1  
2  
3  
4 Study participants were type 2 diabetes patients who visited the Metabolic Disease  
5 Management center of the Tianjin 4th Central Hospital from December 2018 to April 2019. This  
6 clinical study protocol was approved by the institutional review board of Tianjin 4th Central  
7 Hospital, and all steps were conducted in accordance with the principles the World Medical  
8 Association Declaration of Helsinki<sup>[9]</sup>. (Trial registration code: ChiCTR1900020728).  
9  
10

## 11 2.2. Inclusion criteria

12  
13  
14 Our study participants enrolled at baseline with newly diagnosed with T2DM within past six  
15 months; patients who could communicate independently and describe their smoking status;  
16 none of the smokers had given up smoking before the study; all patients underwent diabetic  
17 retinopathy screening in the study.  
18  
19

## 20 2.3. Exclusion criteria

21  
22  
23 Exclusion criteria : Type 1 diabetes and other specific types of diabetes; acute complications  
24 of diabetes, such as diabetic ketoacidosis or lactic acidosis; hypovolaemic; subjects with diabetic  
25 nephropathy complications, rheumatic diseases, autoimmune diseases ,pregnancy, malignant  
26 tumor, infection, foot ulcer, mental illness, thyroid dysfunction, severe hepatic insufficiency or  
27 renal insufficiency , anemia, heart failure or respiratory insufficiency; cognitive impairment, and  
28 communication disorders.  
29  
30  
31

## 32 2.4. Evaluation of Clinical variables

33  
34  
35 Information about patients' names, sex, phone numbers, Body mass index (BMI), age,  
36 smoking history, drinking history, family history of DM, hypertension and HbA1c was collected by  
37 using a uniform information table. The formula for BMI is weight in kilograms divided by height  
38 in meters squared. BMI ( $\geq 28 \text{ kg/m}^2$ ) met obesity criteria according to Chinese standards. HbA1c  
39 levels were measured with affinity chromatography. Smoking status assessment: according to  
40 the WHO (1984) smoking survey method, smoking at least one cigarette per day for more than  
41 one year is considered as smoking history. The smoking index is calculated by multiplying the  
42 number of cigarettes smoked per day by the number of years the person has smoked. In our  
43 study, according to the smoking index, 0 means non-smoking,  $\leq 500$  means light and moderate  
44 smoking, and  $> 500$  means heavy smoking. According to the age of diagnosis of T2DM, subjects  
45 were divided into two cases ( $\geq 40$  or  $< 40$  years old)<sup>[10]</sup>.  
46  
47  
48  
49  
50  
51

52  
53 According to EURODIAB guidelines, screening for DR was carried out with one 45° field  
54 retinography, centred on the fovea. If DR was suspected, another two retinographies of 45°  
55 were taken<sup>[11]</sup>. Ophthalmologists judged whether the patient had DR or not according to the  
56 results of the funduscopy examination and guidelines. In this study, there were only two cases  
57  
58  
59  
60

1  
2  
3 according to the results (diabetic retinopathy DR and non-diabetic retinopathy NDR), and the  
4 patients were divided into two groups (DR group and NDR group).  
5  
6

## 7 2.5. Statistical analysis

8  
9 Statistical analysis was performed using SPSS 16.0 software. We concluded that a significant  
10 difference exists if  $P < 0.05$  (two-sides) . For continuous variables, Kolmogorov-Smirnov Z-test was  
11 used to check . Once normal distribution and homogeneity of variance were satisfied, values  
12 were represented by the mean  $\pm$  SD and student t-test was used to compare the difference  
13 between two groups. Otherwise, values were represented by the median and rank sum test was  
14 applied. For categorical variables, chi-squared test was performed. The occurrence of DR was  
15 identified as the dependent variable, and the related risk factors were listed as independent  
16 variables. Both of the variables were included in a multivariate logistic regression analysis.  
17  $\alpha = 0.05$ .  
18  
19  
20  
21  
22

## 23 3. Results

### 24 3.1. Baseline characteristics of participants with newly diagnosed T2DM

25  
26 The clinical trial flow chart is shown in Figure 1. Initially, 952 patients entered the study and  
27 5 patients were unable to see the fundus. Finally, a total of 947 patients were enrolled in the  
28 study, including 566 males (59.8%) and 381 females (40.2%). The mean ages were  $53.2 \pm 11.6$   
29 years. The average BMI was  $27.5 \pm 4.3 \text{ kg/m}^2$ . 430 patients (45.4%) have been smoking. The  
30 average smoking age was  $27.8 \pm 12.2$  years (2~60 years). They smoked  $21.8 \pm 12.3$  cigarettes per  
31 day. 147 patients (15.5%) were diagnosed T2DM before 40 years old . There were 580 patients  
32 (61.2%) with family history of DM, and 195 patients (20.6%) with drinking history. The mean  
33 HbA1c was  $9.53 \pm 2.13\%$ . There were 755 NDR patients (79.7%) and 192 DR patients (20.3%). 12  
34 patients (1.3%) suffered from proliferative diabetic retinopathy (PDR). Baseline characteristics  
35 were shown in Table 1.  
36  
37  
38  
39  
40  
41  
42  
43

### 44 3.2. The comparison of clinical data between DR and NDR groups was shown in Table 2.

45  
46 There was no statistically significant difference between the two groups in sex, age,  
47 hypertension, proportion of patients with DM diagnosed age <40 years old, family history of  
48 diabetes, drinking history and HbA1c. BMI was significantly higher in DR patients ( $27.7 \pm 4.2$  vs  $26.7$   
49  $\pm 4.4$ ,  $p = 0.004$ ). In our study, according to the smoking index, 0 means non-smoking,  $\leq 500$   
50 means light and moderate smoking, and  $> 500$  means heavy smoking. We found that smoking  
51 status was different between the two groups ( $\chi^2 = 6.350$ ,  $p = 0.042$ ).  
52  
53  
54  
55

56 3.3. The occurrence of DR was identified as the dependent variable, and the related risk factors  
57 were listed as independent variables. Both of the variables were proceeded through a  
58  
59  
60



multivariate logistic regression analysis in Table 3. BMI( $\geq 28 \text{ kg/m}^2$ ) is a related factor for DR in newly diagnosed diabetic patients (OR=0.634,  $p=0.012$ ).

3.4. The average age of newly T2DM patients with obesity was  $50.4 \pm 12.4$  years, while that of patients without obesity was  $55.1 \pm 10.6$  years. The former was significantly lower than the latter ( $t=6.094$ ,  $p<0.001$ ). Because the onset of T2DM is insidious, patients may have a long history before diagnosis. We divided the participants into two parts according to whether BMI was  $\geq 28 \text{ kg/m}^2$ . We compared the incidence of DR in patients with different smoking status (Figure 2), and used logistic regression analysis to analysis the related factors of DR (Table 4). When BMI was  $\geq 28 \text{ kg/m}^2$ , we found that heavy smoking was significantly associated with DR (OR=2.336,  $p=0.027$ ).

**Table 1** Baseline characteristics of participants with newly diagnosed T2DM.

| Characteristics of participants                 | Comment                    | Statistical value |
|-------------------------------------------------|----------------------------|-------------------|
| Sex (n, %)                                      | Male                       | 566 (59.78%)      |
| Age (years)                                     |                            | $53.2 \pm 11.6$   |
| Family history of DM (n, %)                     |                            | 580 (61.2%)       |
| Age of diagnosis of DM (n, %)                   | < 40 years old             | 147 (15.5%)       |
| HbA1c (%)                                       |                            | $9.53 \pm 2.13$   |
| BMI ( $\text{kg/m}^2$ )                         |                            | $27.5 \pm 4.3$    |
| Hypertension (n, %)                             |                            | 498 (52.6%)       |
| Drinking history                                |                            | 195 (20.6%)       |
| Smoking status (n, %)                           | Non-smoking                | 517 (54.6%)       |
|                                                 | Light and moderate smoking | 212 (22.4%)       |
|                                                 | Heavy smoking              | 218 (23.0%)       |
| The number of years a person has smoked (years) |                            | $27.8 \pm 12.2$   |
| DR (n, %)                                       |                            | 192 (20.3%)       |
| PDR (n, %)                                      |                            | 12 (1.3%)         |

**Table 2** Comparison of clinical data between DR and NDR groups

| Items                     |                            | NDR<br>(n=755) | DR<br>(n=192) | t/ $\chi^2$         | P value |
|---------------------------|----------------------------|----------------|---------------|---------------------|---------|
| Sex                       | Male                       | 447 (79.0%)    | 119 (21.0%)   | 0.490 <sup>a</sup>  | 0.510   |
|                           | Female                     | 308 (80.8%)    | 73 (19.2%)    |                     |         |
| Age                       | years                      | 53.3±11.7      | 52.9±11.1     | 0.350 <sup>b</sup>  | 0.726   |
| Family history of DM      | no                         | 288 (78.5%)    | 79 (21.5%)    | 0.580 <sup>a</sup>  | 0.456   |
|                           | yes                        | 467 (80.5%)    | 113 (19.5%)   |                     |         |
| Drinking history          | no                         | 608 (80.9%)    | 144 (219.1%)  | 2.863 <sup>a</sup>  | 0.109   |
|                           | yes                        | 147 (75.4%)    | 48 (24.6%)    |                     |         |
| Hypertension <sup>c</sup> | no                         | 349 (81.2%)    | 81 (18.8%)    | 1.457 <sup>a</sup>  | 0.265   |
|                           | yes                        | 392 (78.7%)    | 106 (21.3%)   |                     |         |
| DM diagnosed age <40      | no                         | 123 (83.7%)    | 24 (16.3%)    | 1.678 <sup>a</sup>  | 0.220   |
|                           | yes                        | 632 (79.0%)    | 168 (21.0%)   |                     |         |
| HbA1c                     | %                          | 9.51±2.13      | 9.60±2.12     | -0.546 <sup>b</sup> | 0.585   |
| BMI                       | kg/m <sup>2</sup>          | 27.7±4.2       | 26.7±4.4      | 2.921 <sup>b</sup>  | 0.004   |
| Smoking history           | no                         | 424(82.0%)     | 93(18.0%)     | 3.682 <sup>b</sup>  | 0.062   |
|                           | yes                        | 331(77.0%)     | 99(23.0%)     |                     |         |
| Smoking status            | Non-smoking                | 424 (82.0%)    | 93 (18.0%)    | 6.350 <sup>a</sup>  | 0.042   |
|                           | Light and moderate smoking | 170 (80.2%)    | 42 (19.8%)    |                     |         |
|                           | Heavy smoking              | 161 (73.9%)    | 57 (26.1%)    |                     |         |

Note: <sup>a</sup> chi-square test , <sup>b</sup> student t test and <sup>c</sup>19 cases of patients with missing data. There was no

statistically significant difference if  $p > 0.05$ .

**Table 3** Logistic regression analysis of related factors for DR

| Independent variables      | B      | SE    | Wald $\chi^2$ | P value | OR    | 95%CI       |
|----------------------------|--------|-------|---------------|---------|-------|-------------|
| Sex                        | 0.085  | 0.224 | 0.144         | 0.705   | 1.089 | 0.702-1.688 |
| Hypertension               | 0.171  | 0.172 | 0.993         | 0.319   | 1.187 | 0.847-1.663 |
| Drinking history           | 0.178  | 0.219 | 0.659         | 0.417   | 1.195 | 0.778-1.835 |
| HbA1c                      | 0.075  | 0.168 | 0.197         | 0.657   | 1.077 | 0.775-1.498 |
| BMI                        | -0.456 | 0.181 | 6.334         | 0.012   | 0.634 | 0.445-0.904 |
| Family history of DM       | -0.125 | 0.170 | 0.547         | 0.460   | 0.882 | 0.633-1.230 |
| DM diagnosed age <40 years | 0.011  | 0.263 | 0.002         | 0.966   | 1.011 | 0.604-1.692 |
| Smoking status             |        |       | 3.479         | 0.176   |       |             |
| Light and moderate smoking | 0.087  | 0.249 | 0.121         | 0.728   | 1.091 | 0.669-1.777 |
| Heavy smoking              | 0.427  | 0.244 | 3.056         | 0.080   | 1.533 | 0.950-2.474 |
| Constant                   | -1.579 | 0.631 | 6.259         | 0.012   | 0.206 |             |

Note: assignment instructions as follows---Sex (male 1, female 2); BMI(<28 0,  $\geq 28$  1); HbA1c( $\leq 9\%$  0,  $>9\%$  1); Hypertension、drinking history、family history of DM and DM diagnosed age <40 years no 0, yes 1; Smoking status non-smoking 0, light and moderate smoking 1, heavy smoking 2, non-smoking as the reference.

**Table 4** Logistic regression analysis of related factors for DR(BMI<28kg/m<sup>2</sup>,  $\geq 28$ kg/m<sup>2</sup>)

| Independent variables        | B      | SE    | Wald $\chi^2$ | P value | OR    | 95%CI       |
|------------------------------|--------|-------|---------------|---------|-------|-------------|
| BMI<28 kg/m <sup>2</sup> Sex | -0.167 | 0.283 | 0.347         | 0.556   | 1.182 | 0.678-2.060 |
| Hypertension                 | 0.070  | 0.212 | 0.107         | 0.743   | 1.072 | 0.707-1.625 |

|                   |                            |        |       |       |       |       |             |
|-------------------|----------------------------|--------|-------|-------|-------|-------|-------------|
|                   | Drinking history           | 0.059  | 0.275 | 0.046 | 0.830 | 1.061 | 0.619-1.817 |
|                   | HbA1c                      | -0.025 | 0.205 | 0.015 | 0.902 | 0.975 | 0.653-1.457 |
|                   | Family history of DM       | -0.368 | 0.204 | 3.247 | 0.072 | 0.692 | 0.464-1.033 |
|                   | DM diagnosed age <40 years | 0.099  | 0.380 | 0.068 | 0.794 | 1.104 | 0.525-2.324 |
|                   | Smoking status             |        |       | 1.037 | 0.595 |       |             |
|                   | Light and moderate smoking | 0.278  | 0.318 | 0.766 | 0.382 | 1.321 | 0.720-2.506 |
|                   | Heavy smoking              | 0.295  | 0.318 | 0.858 | 0.354 | 1.343 | 0.950-2.474 |
| BMI $\geq$ 28     | Sex                        | -0.009 | 0.382 | 0.001 | 0.980 | 0.991 | 0.468-2.096 |
| kg/m <sup>2</sup> | Hypertension               | 0.345  | 0.313 | 1.220 | 0.269 | 1.412 | 0.765-2.607 |
|                   | Drinking history           | 0.465  | 0.377 | 1.526 | 0.217 | 1.592 | 0.761-3.331 |
|                   | HbA1c                      | 0.335  | 0.304 | 1.213 | 0.271 | 1.398 | 0.770-2.536 |
|                   | Family history of DM       | 0.449  | 0.325 | 1.905 | 0.167 | 1.566 | 0.828-2.962 |
|                   | DM diagnosed age <40 years | 0.046  | 0.376 | 0.015 | 0.902 | 1.047 | 0.501-2.187 |
|                   | Smoking status             |        |       | 7.156 | 0.028 |       |             |
|                   | Light and moderate smoking | -0.173 | 0.422 | 0.169 | 0.681 | 0.841 | 0.368-1.922 |
|                   | Heavy smoking              | 0.848  | 0.384 | 4.879 | 0.027 | 2.336 | 1.100-4.960 |

#### 4. Discussion

DR is a serious chronic microvascular complication of DM. In the early stage of DR, patients may have only mild symptoms or no symptoms. With progression of the disease, new blood vessels formed in the areas of capillary non-perfusion in the fundus, which may eventually lead to blindness. DR is the most important reason of irreversible blindness in working-age adults. Many researchers have shown that duration of DM, blood glucose, blood pressure and blood lipids are important risk factors for DR<sup>[12]</sup>. The duration is the most important factor<sup>[13]</sup>. To the best of our knowledge, the present study is the first one that is designed to investigate the correlation between smoking severity and DR in newly diagnosed patients with T2DM. The

1  
2  
3 results suggest that heavy smoking may be an independent risk factor for DR (OR=2.336,  
4 p=0.027) in obese newly diagnosed T2DM patients (BMI $\geq$ 28kg/m<sup>2</sup>).  
5  
6

7 Cigarette smoking is a known risk factor for many diseases, including various kinds of cancer  
8 and cardiovascular diseases. Many researchers have reported the negative effects of smoking for  
9 DM. A 14-year prospective cohort study in South Korean showed that the risk of DM among men  
10 and women who smoked 20 or more cigarettes a day was 1.55 times than non-smokers<sup>[7]</sup>. A  
11 research in the United States and South Korea found that men who smoked before age 20 had  
12 significantly higher rates of DM<sup>[14]</sup>. New quitters had an increased risk of diabetes, but the risk  
13 reduced significantly as time went on<sup>[15]</sup>. A six-year retrospective cohort study showed that  
14 quitting smoking would not make people weight gain, but increased the risk of new diabetes in  
15 the short term<sup>[16]</sup>. Cigarette smoking is independently associated with the incidence of type 2  
16 diabetes mellitus (DM). Although the mechanisms involved in the association are not clear yet.  
17 Smoking is associated with insulin resistance, inflammation and dyslipidemia<sup>[17]</sup>. A study showed  
18 that adiponectin concentrations might mediate the effects of smoking on diabetes, but leptin  
19 and CRP levels did not<sup>[18]</sup>.  
20  
21  
22  
23  
24  
25  
26

27 Generally, several studies have shown that smoking has an adverse effect on diabetic  
28 nephropathy, but the influence of smoking independently with glucose control on retinopathy  
29 are unclear. Some studies reported that no association was found between smoking and  
30 retinopathy in patients with T2DM<sup>[19]</sup>. The United Kingdom Prospective Diabetic (UKPD) study  
31 which to determine risk factors related to the incidence and progression of diabetic retinopathy  
32 followed patients over 6 years from diagnosis of Type II (non-insulin-dependent) diabetes  
33 mellitus. The development of retinopathy was associated with glycemia and higher blood  
34 pressure, but not smoking<sup>[20]</sup>. Thus in patients with T2DM, the effect of smoking on diabetic  
35 retinopathy is not so clear compared with nephropathy. 20% of newly diagnosed type 2 diabetes  
36 mellitus(T2DM) are diagnosed with DR<sup>[3]</sup>. The explanation of this phenomenon is that the onset  
37 of T2DM is usually insidious, and many patients with diabetes have been suffering from diabetes  
38 for many years before being diagnosed. Although we cannot completely rule out the relevance  
39 between known duration of DM and the prevalence of DR, our study suggests that smoking may  
40 be a risk factor for the occurrence of DR in newly diagnosed diabetic patients. Basic research  
41 shows that smoke from burning cigarettes contains a large variety of compounds, including  
42 nicotine, cadmium, benzopyrene, oxidants and free radicals. These substances cause  
43 vasoconstriction, leading to local hypoxia. The early phenomenon of smoke toxicity is vascular  
44 endothelial dysfunction. Studies have shown that cigarette smoking impairs nitric  
45 oxide-mediated endothelial function via increased generation of superoxide anion, which may  
46 increase the risk of diabetic retinopathy in diabetic patients<sup>[21]</sup>. Jaimes EA et al. found that short  
47 exposure (for 30 minutes) of bovine pulmonary arterial endothelial cells, human pulmonary  
48  
49  
50  
51  
52  
53  
54  
55  
56  
57  
58  
59  
60

1  
2  
3 artery endothelial cells and rat pulmonary artery to cigarette smoke extracts, resulted a large  
4 increase in superoxide anion production which was prevented by prior inhibition of NADPH  
5 oxidase. So the study reported compounds of cigarette smoke by NADPH oxidase activation  
6 induced endothelial superoxide anion production which caused vascular endothelial  
7 dysfunction<sup>[22]</sup>, can cause eye tissue ischemia, eye tissue hypoxia, retinal arteriosclerosis and  
8 decrease of choroidal blood flow, eventually leading to retinal ischemia. Then DR happens finally.  
9 Tyrberg M et al. investigated 794 patients diagnosed with diabetes in 1987-1988 and found that  
10 smoking history could increase the risk of diabetic retinopathy during 9 to 17 years after  
11 diagnosis<sup>[23]</sup>. In our investigation, the incidence of DR was 18.0% in non-smokers, 19.8% in light  
12 and moderate smokers, and 26.1% in heavy smokers. Higher smoking amount maybe a risk  
13 factor of getting DR in newly diagnosed T2DM patients.  
14  
15  
16  
17  
18  
19

20  
21 In the study, we found that DR was negatively correlated with BMI(OR=0.634,p=0.012). Gray  
22 et al. followed up 14,657 diabetic patients for an average of 6.68 years and found that increased  
23 risk of DR was associated with higher BMI<sup>[24]</sup>. It had also been reported that BMI was not  
24 correlated or even negatively correlated with DR<sup>[25]</sup>. The subjects in our study were newly  
25 diagnosed type 2 diabetes mellitus. The average age of newly T2DM patients with  
26 obesity(BMI $\geq$ 28kg/m<sup>2</sup>) was 50.4  $\pm$  12.4 years, while that of patients without obesity was 55.1  $\pm$   
27 10.6 years. The former was significantly lower than the latter(t=6.094, p<0.001). As the onset of  
28 T2DM is insidious, patients may have a long history before diagnosis. Based on the usual clinical  
29 experience and their different diagnostic ages, our study suggests that the diagnostic age of  
30 T2DM patients with obesity is closer to the real age of onset. When BMI was  $\geq$ 28 kg/m<sup>2</sup>, we  
31 found that the incidence of DR was 12.4% in non-smokers, 12.1% in light and moderate smokers,  
32 and 28.2% in heavy smokers( $\chi^2=11.163$ ,p=0.004). Heavy smoking was significantly associated  
33 with DR(OR=2.336, p=0.027).  
34  
35  
36  
37  
38  
39  
40

## 41 **5. Conclusion**

42  
43 Our study found that heavy smoking was an independent risk factor for the occurrence of  
44 DR in newly diagnosed diabetes mellitus patients when BMI was  $\geq$ 28 kg/m<sup>2</sup>. Although our study  
45 subjects were with all newly diagnosed patients, it was known that the onset of type 2 diabetes  
46 mellitus was relatively insidious, and especially HbA1c levels of all subjects of our study were  
47 higher than 9%. So their course of disease may have been last for a period of time. And we can  
48 also speculate that DR is associated with smoking status in pre-diabetes. It is of great significance  
49 to quit smoking in high-risk population of diabetes mellitus. Therefore, to elucidate the  
50 correlation clearly, we need to do a long-term cohort study with large sample to confirm.  
51  
52  
53  
54  
55

## 56 **Acknowledgements**

This work was supported by National Key R&D Program of China(2018YFC1314000) and Tianjin Science and Technology Development Strategy Research Projects(18ZLZXZF00740).

**Competing interests** None declared.

**Patient consent** Obtained.

**Ethics approval** This study was approved by the IRB of Tianjin 4th Central Hospital(2017-SZXL017) and the Chinese Clinical Trial Registry (No. ChiCTR1900020728).

**Provenance and peer review** Not commissioned; externally peer reviewed.

**Contributors** Zhaohu Hao wrote the manuscript. Xiao Huang was in charge of fundus examination. Yongzhang Qin was responsible for basic information collection. Hailin Shao was responsible for the statistical analysis of the data. Huanming Li was responsible for auditing the fundus images and reports. Rong Xu was responsible for keeping patients in order. Baocheng Chang proposed the necessity and design of the study. Fengshi Tian was the director of our department and also provided project support for the research.

**Data sharing statement** Extra data is available by emailing keddyhm@163.com

## References

- 1.American Diabetes Association.(2017). Classification and diagnosis of diabetes [J]. Diabetes Care, 40(suppl 1):S11-S24.
- 2.Wang L , Gao P , Zhang M , et al. Prevalence and Ethnic Pattern of Diabetes and Prediabetes in China in 2013[J]. JAMA, 2017, 317(24):2515-2523.
- 3.Yau J W Y , Rogers S , Kawasaki R . Global prevalence and major risk factors of diabetic retinopathy[J]. Diabetes Care, 2012, 35(3):556-564.
- 4.Pang C, Jia L, Jiang S, et al.Determination of diabetic retinopathy prevalence and associated risk factors in Chinese diabetic and pre-diabetic subjects: shanghai diabetic complications study[J]. Diabetes Metab Res Rev, 28(3):276-283.
- 5.Mellitus, E.C.O.O. D. . (2002). American diabetes association: clinical practice recommendations 2002. Diabetes Care, 25 Suppl 1, S1-147.
- 6.GBD 2015 Risk Factors Collaborators.(2016).Global, regional, and national comparative risk assessment of 79 behavioural, environmental and occupational, and metabolic risks or clusters of risks,1990-2015: a systematic analysis for the Global Burden of Disease Study 2015[J]. Lancet,388(10053):1659-1724.

- 1  
2  
3  
4 7.Jee S H , Foong A W , Hur N W , et al. Smoking and Risk for Diabetes Incidence and Mortality in Korean Men  
5 and Women[J]. *Diabetes Care*, 2010, 33(12):2567-2572.  
6  
7  
8 8.Matthews DR, Cull CA, Stratton IM, et al. UKPDS 26: sulphonylurea failure in non-insulin-dependent diabetic  
9 patients over six years[J]. *Diabetic Medicine A Journal of the British Diabetic Association*, 15(4):297-303.  
10  
11 9.General Assembly of the World Medical Association.(2014). World Medical Association Declaration of  
12 Helsinki:ethical principles for medical research involving human subjects. *The Journal of the American College of*  
13 *Dentists*, 81:14-18.  
14  
15  
16 10.George DC , Chakraborty C. , Haneef SA, et al. Evolution- and structure-based computational strategy reveals  
17 the impact of deleterious missense mutations on *mody 2* (maturity-onset diabetes of the young, type  
18 2)[J]. *Theranostics*, 4(4), 366-385.  
19  
20  
21 11.Romero P , Sagarra R, Ferrer J, et al. The incorporation of family physicians in the assessment of diabetic  
22 retinopathy by non-mydratric fundus camera[J]. *Diabetes Res Clin Pract*, 88(2), 0-188.  
23  
24  
25 12.Van Leiden H A , Dekker J M , Moll A C , et al. Blood Pressure, Lipids, and Obesity Are Associated With  
26 Retinopathy: The Hoorn Study[J]. *Diabetes Care*, 2002, 25(8):1320-1325.  
27  
28  
29 13.Cohen O , Norymberg K , Neumann E , et al. Complication-Free Duration and the Risk of Development of  
30 Retinopathy in Elderly Diabetic Patients[J]. *Archives of Internal Medicine*, 1998, 158(6):641-644.  
31  
32  
33 14.Kim S , Jee S , Nam J , et al. Do early onset and pack-years of smoking increase risk of type II diabetes?[J]. *BMC*  
34 *Public Health*, 2014, 14(1):178.  
35  
36  
37 15.Pan A, Wang Y, Talaei M, et al. Relation of active, passive, and quitting smoking with incident type 2 diabetes: a  
38 systematic review and meta-analysis[J]. *The Lancet Diabetes & Endocrinology*, 2015, 3(12):958-67.  
39  
40  
41 16.Sung Y T , Hsiao C T , Chang I J , et al. Smoking Cessation Carries a Short-Term Rising Risk for Newly  
42 Diagnosed Diabetes Mellitus Independently of Weight Gain: A 6-Year Retrospective Cohort Study[J]. *Journal of*  
43 *Diabetes Research*, 2016, 2016:1-7.  
44  
45  
46 17.Ah C S. Smoking and Type 2 Diabetes Mellitus[J]. *Diabetes & Metabolism Journal*, 2012, 36(6):399-403.  
47  
48  
49 18.Hilawe E H , Yatsuya H , Li Y , et al. Smoking and Diabetes: Is the Association Mediated by Adiponectin, Leptin,  
50 or C-reactive Protein?[J]. *Journal of Epidemiology*, 2015, 25(2):99-109.  
51  
52  
53 19.Moss S E , Klein R , Klein B E K . Cigarette Smoking and Ten-year Progression of Diabetic Retinopathy[J].  
54 *Ophthalmology*, 1996, 103(9):1438-1442.  
55  
56 20.Stratton I M , Kohner E M , Aldington S J , et al. UKPDS 50: Risk factors for incidence and progression of  
57 retinopathy in Type II diabetes over 6 years from diagnosis[J]. *Diabetologia*, 2001, 44(2):156-163.  
58  
59



1  
2  
3 21. Tsuneaki O , Taiji N , Akitoshi Y . Effects of Habitual Cigarette Smoking on Retinal Circulation in Patients With  
4 Type 2 Diabetes[J]. Investigative Ophthalmology & Visual Science, 2016, 57(3):1345-1351.

5  
6  
7 22. Jaimes E A , Demaster E G , Tian R X , et al. Stable Compounds of Cigarette Smoke Induce Endothelial  
8 Superoxide Anion Production via NADPH Oxidase Activation[J]. Arterioscler Thromb Vasc Biol, 2004,  
9 24(6):1031-1036.

10  
11  
12 23. Tyrberg M , Nyström L , Arnqvist H J , et al. Overweight, hyperglycemia and tobacco use are modifiable risk  
13 factors for onset of retinopathy 9 and 17, years after the diagnosis of diabetes- A retrospective observational  
14 nation-wide cohort study[J]. Diabetes Research and Clinical Practice, 2017, 133:21-29.

15  
16  
17 24. Gray N , Picone G , Sloan F , et al. Relation between BMI and Diabetes Mellitus and Its Complications among  
18 US Older Adults[J]. Southern Medical Journal, 2015, 108(1):29-36.

19  
20  
21 25. Rooney D , Lye W K , Tan G , et al. Body mass index and retinopathy in Asian populations with diabetes  
22 mellitus[J]. Acta Diabetologica, 2015, 52(1):73-80.

23  
24  
25  
26  
27  
28 **Figure 1** The clinical trial flow chart.

29  
30 **Abbreviations:** BMI, body mass index; SI, smoking index; DR, diabetic retinopathy; NDR, non-diabetic  
31 retinopathy; DM, diabetes mellitus.

32  
33  
34  
35  
36 **Figure 2** The incidence of DR in patients with different smoking status

37  
38 Note: There was no difference in DR incidence among patients with different smoking  
39 status ( $BMI < 28 \text{ kg/m}^2, \chi^2 = 0.901, p = 0.634$ ); When the patients were obese ( $BMI \geq 28 \text{ kg/m}^2$ ), the DR  
40 detection rate of severe smokers was significantly higher ( $\chi^2 = 11.163, p = 0.004$ ).

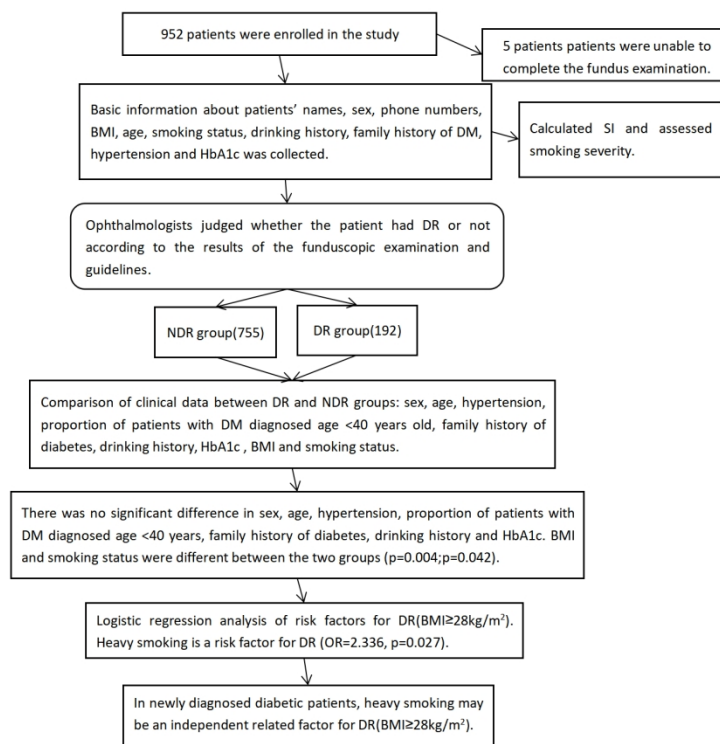

1  
2  
3  
4  
5  
6  
7  
8  
9  
10  
11  
12  
13  
14  
15  
16  
17  
18  
19  
20  
21  
22  
23  
24  
25  
26  
27  
28  
29  
30  
31  
32  
33  
34  
35  
36  
37  
38  
39  
40  
41  
42  
43  
44  
45  
46  
47  
48  
49  
50  
51  
52  
53  
54  
55  
56  
57  
58  
59  
60

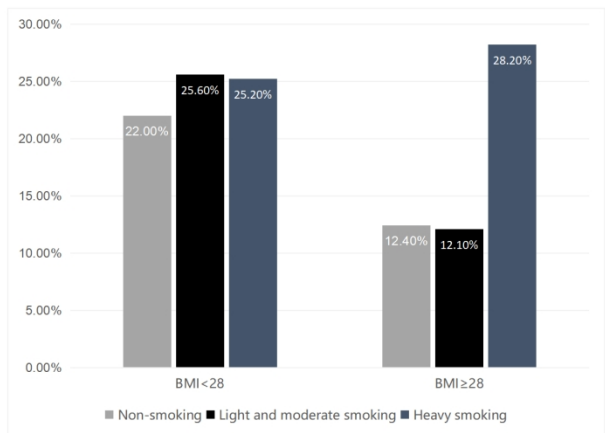

# BMJ Open

## Analysis of factors related to diabetic retinopathy in newly diagnosed type 2 diabetic patients: a cross-sectional study

|                                 |                                                                                                                                                                                                                                                                                                                                                                                                                                                                                                                                                                                                                                                                                                                                                                                                                  |
|---------------------------------|------------------------------------------------------------------------------------------------------------------------------------------------------------------------------------------------------------------------------------------------------------------------------------------------------------------------------------------------------------------------------------------------------------------------------------------------------------------------------------------------------------------------------------------------------------------------------------------------------------------------------------------------------------------------------------------------------------------------------------------------------------------------------------------------------------------|
| Journal:                        | <i>BMJ Open</i>                                                                                                                                                                                                                                                                                                                                                                                                                                                                                                                                                                                                                                                                                                                                                                                                  |
| Manuscript ID                   | bmjopen-2019-032095.R1                                                                                                                                                                                                                                                                                                                                                                                                                                                                                                                                                                                                                                                                                                                                                                                           |
| Article Type:                   | Original research                                                                                                                                                                                                                                                                                                                                                                                                                                                                                                                                                                                                                                                                                                                                                                                                |
| Date Submitted by the Author:   | 10-Sep-2019                                                                                                                                                                                                                                                                                                                                                                                                                                                                                                                                                                                                                                                                                                                                                                                                      |
| Complete List of Authors:       | Hao, Zhaohu; Tianjin Medical University, Tianjin Metabolic Diseases Hospital; Tianjin 4th Central Hospital, Metabolic Disease Management Center,<br>Huang, Xiao; Tianjin Medical University, Tianjin Metabolic Diseases Hospital<br>Qin, Yongzhang; Tianjin Medical University, Tianjin Metabolic Diseases Hospital; The First Affiliated Hospital of Gannan Medical University<br>Shao, Hailin; Tianjin 4th Central Hospital, Metabolic Disease Management Center,<br>Li, Huanming; Tianjin 4th Central Hospital, Metabolic Disease Management Center,<br>Xu, Rong; Tianjin 4th Central Hospital, Metabolic Disease Management Center,<br>Chang, Baocheng; Tianjin Medical University, Tianjin Metabolic Diseases Hospital<br>Tian, Fengshi; Tianjin 4th Central Hospital, Metabolic Disease Management Center, |
| <b>Primary Subject Heading</b>: | Diabetes and endocrinology                                                                                                                                                                                                                                                                                                                                                                                                                                                                                                                                                                                                                                                                                                                                                                                       |
| Secondary Subject Heading:      | Public health, Smoking and tobacco                                                                                                                                                                                                                                                                                                                                                                                                                                                                                                                                                                                                                                                                                                                                                                               |
| Keywords:                       | Smoking index, Diabetic retinopathy < DIABETES & ENDOCRINOLOGY, Type 2 diabetes mellitus, newly diagnosed diabetes mellitus                                                                                                                                                                                                                                                                                                                                                                                                                                                                                                                                                                                                                                                                                      |
|                                 |                                                                                                                                                                                                                                                                                                                                                                                                                                                                                                                                                                                                                                                                                                                                                                                                                  |

SCHOLARONE™  
Manuscripts



I, the Submitting Author has the right to grant and does grant on behalf of all authors of the Work (as defined in the below author licence), an exclusive licence and/or a non-exclusive licence for contributions from authors who are: i) UK Crown employees; ii) where BMJ has agreed a CC-BY licence shall apply, and/or iii) in accordance with the terms applicable for US Federal Government officers or employees acting as part of their official duties; on a worldwide, perpetual, irrevocable, royalty-free basis to BMJ Publishing Group Ltd ("BMJ") its licensees and where the relevant Journal is co-owned by BMJ to the co-owners of the Journal, to publish the Work in this journal and any other BMJ products and to exploit all rights, as set out in our [licence](#).

The Submitting Author accepts and understands that any supply made under these terms is made by BMJ to the Submitting Author unless you are acting as an employee on behalf of your employer or a postgraduate student of an affiliated institution which is paying any applicable article publishing charge ("APC") for Open Access articles. Where the Submitting Author wishes to make the Work available on an Open Access basis (and intends to pay the relevant APC), the terms of reuse of such Open Access shall be governed by a Creative Commons licence – details of these licences and which [Creative Commons](#) licence will apply to this Work are set out in our licence referred to above.

Other than as permitted in any relevant BMJ Author's Self Archiving Policies, I confirm this Work has not been accepted for publication elsewhere, is not being considered for publication elsewhere and does not duplicate material already published. I confirm all authors consent to publication of this Work and authorise the granting of this licence.

1  
2  
3 **Analysis of factors related to diabetic retinopathy in newly diagnosed type 2 diabetic patients:**  
4 **a cross-sectional study. ( Tables = 4, Figures = 2)**  
5

6  
7 Zhaohu Hao<sup>1,2\*</sup> MD, Xiao Huang<sup>1\*</sup> RN, Yongzhang Qin<sup>1,3</sup>, Hailin Shao<sup>2</sup> MD, Huanming Li<sup>2</sup> MD, Rong  
8 Xu<sup>2</sup>MD, Baocheng Chang<sup>1</sup> § MD, Fengshi Tian<sup>2</sup> § MD.  
9

10 Author Affiliations:

11  
12  
13 1 NHC Key Laboratory of Hormones and Development (Tianjin Medical University),  
14 Tianjin Key Laboratory of Metabolic Diseases, Tianjin Medical University Chu Hsien-I  
15 Memorial Hospital & Tianjin Institute of Endocrinology, Tianjin 300134, China  
16

17  
18 2 Department of Metabolic Disease Management Center, Tianjin 4th Central Hospital, The 4th  
19 Central Hospital Affiliated to Nankai University, The 4th Center Clinical College of Tianjin Medical  
20 University, 300140 Tianjin, China  
21

22  
23 3 Department of Endocrinology, The First Affiliated Hospital of Gannan Medical University,  
24 341000 Ganzhou, China  
25

26  
27 \*These authors contributed equally and are co-first authors of this article.  
28

29  
30 § Corresponding authors: Prof Baocheng Chang, NHC  
31 Key Laboratory of Hormones and Development (Tianjin Medical University), Tianjin Key  
32 Laboratory of Metabolic Diseases, Tianjin Medical University Chu Hsien-I Memorial Hospital &  
33 Tianjin Institute of Endocrinology, Tianjin 300134,China; Prof Fengshi Tian, Department of  
34 Metabolic Disease Management Center, Tianjin 4th Central Hospital, The 4th Central Hospital  
35 Affiliated to Nankai University, The 4th Center Clinical College of Tianjin Medical University, No.1  
36 Zhongshan Road, Tianjin 300140, China  
37  
38  
39

40  
41 Tel: +86- 02226249403; +86- 02226249281  
42

43  
44 E-mail: Changbaocheng2019@163.com; [Tianfengshi20198@sohu.com](mailto:Tianfengshi20198@sohu.com)  
45  
46  
47

48 **Abstract**  
49

50 **Aim:** To investigate the related factors of DR, and explore the correlation between smoking and  
51 DR in patients with newly diagnosed type 2 diabetes who visited in the hospital from December  
52 2018 to April 2019.  
53

54 **Design:** A single-centre cross-sectional study.  
55  
56  
57  
58

1  
2  
3  
4  
5  
6  
7  
8  
9  
10  
11  
12  
13  
14  
15  
16  
17  
18  
19  
20  
21  
22  
23  
24  
25  
26  
27  
28  
29  
30  
31  
32  
33  
34  
35  
36  
37  
38  
39  
40  
41  
42  
43  
44  
45  
46  
47  
48  
49  
50  
51  
52  
53  
54  
55  
56  
57  
58  
59  
60

**Setting:** Single-centre, large hospital.

**Participants:** Patients with newly diagnosed type 2 diabetes who visited the hospital from December 2018 to April 2019.

**Methods:** 947 patients were enrolled in the study. They were divided into two groups according to whether they were diagnosed with DR on presentation (diabetic retinopathy group and non diabetic retinopathy group). The smoking index and assessed smoking severity were calculated. Factors such as sex, age, hypertension, proportion of patients with T2DM diagnosed age <40 years old, family history of diabetes, drinking history, HbA1c, BMI and smoking status were compared between two groups, and logistic regression was used to analyzing the relationship between DR and the above factors.

**Results** There was no statistically significant difference between the two groups in sex, age, hypertension, proportion of patients with DM diagnosed age <40 years old, family history of diabetes, drinking history and HbA1c. Body mass index (BMI) was significantly higher in DR patients ( $27.7 \pm 4.2$  vs  $26.7 \pm 4.4$ ,  $p=0.004$ ). Smoking status was also different between the two groups ( $\chi^2=6.350$ ,  $p=0.042$ ). BMI was shown to be a related factor for DR in newly diagnosed diabetic patients (OR=0.634,  $p=0.012$ ) by logistic regression analysis. When BMI was  $\geq 28$  kg/m<sup>2</sup>, heavy smoking was significantly associated with DR (OR=2.336,  $p=0.027$ ).

**Conclusions** Heavy smoking was an important related factor for DR in newly diagnosed diabetes mellitus patients when BMI was  $\geq 28$  kg/m<sup>2</sup>. To elucidate the correlation clearly, we need to do a long-term cohort study with a large sample to confirm this.

**Keywords:** Smoking index, Type 2 diabetes mellitus, Diabetic retinopathy, newly diagnosed diabetes mellitus.

#### **Strengths and limitations of this study**

This study is a representative population-based study with large sample size.

There are few studies on the factors related to newly diagnosed diabetic retinopathy in type 2 diabetes mellitus patients in China.

In this study, we first used a smoking index to assess smoking severity in the study of diabetic retinopathy.

The study is a single-centre cross-sectional study.

## Introduction:

Diabetes mellitus (DM) is a chronic metabolic disease characterized by hyperglycemia caused by various etiologies, and the incidence is increasing year by year worldwide. According to the report of the International Diabetes Federation (IDF) in 2017 about 425 million people are affected by DM, and that number is expected to reach 629 million by 2045.<sup>1</sup> China has the highest number of patients with diabetes, and the prevalence has increased from 0.67% in 1980 to 10.4% in 2013.<sup>2</sup> A meta-analysis based epidemiological study conducted from 35 research centers around the world showed that the prevalence of diabetic retinopathy(DR) in the total diabetic population was 35.4%.<sup>3</sup> DR is a highly specific microvascular complication caused by diabetes, and its prevalence is significantly correlated with the course of DM and blood glucose levels.<sup>4</sup> DR is the most important cause of irreversible blindness in working-age adults. Chronic hyperglycemia causes not only retinal vascular diseases, but also damage to retinal neurons, both of which factors lead to vision loss.<sup>5</sup> Twenty percent of newly diagnosed type 2 diabetic (T2DM) patients are diagnosed with DR. The explanation of this phenomenon is that often the onset of T2DM is insidious, and patients may have a long history of untreated hyperglycemia before diagnosis.<sup>3</sup> Are there any other risk factors for DR in these newly diagnosed patients? There is no relevant research report at present.

Smoking is harmful and it's also an important risk factor for cardiovascular, cerebrovascular and, respiratory diseases and malignant tumors.<sup>6</sup> Smoking is one of the most serious public health issues across the world and it is responsible for about 7 million deaths per year worldwide.<sup>6</sup> In a 14-year prospective cohort study, Jee SH found that people smoking more than 20 cigarettes a day had a 1.55-fold higher incidence of diabetes than non-smokers.<sup>7</sup> It is well-known that smoking may cause an increase in proteinuria. Everyone speculates that smoking has a adjunct effect on DR, but there is no direct clinical epidemiological evidence supporting the suggestion that there is a direct link between smoking and DR in newly diagnosed patients.<sup>8</sup> Many diabetic patients had started smoking before they were diagnosed with diabetes. Does smoking contribute to the complications of DR in newly diagnosed patients? Little research has been done on the relationship between smoking and DR in newly diagnosed diabetic patients. The present study investigated the factors related to DR, and explored the correlation between smoking and DR in patients with newly diagnosed type 2 diabetes who visited in the hospital from December 2018 to April 2019.

## Research design and methods:

We conducted a single-center cross-sectional study of factors associated with diabetic



1  
2  
3 retinopathy in newly diagnosed type 2 diabetic patients at Tianjin 4th Central Hospital. The  
4 hospital is a high-level comprehensive hospital with 1000 beds, which is a regional medical  
5 center in Tianjin. The hospital has a diabetes identification center. New diabetic patients in the  
6 region must be identified by the department before they can enjoy more preferential health  
7 insurance policies in the clinic. The Metabolic Disease Management Center is responsible for the  
8 screening for complications in newly diagnosed diabetes patients, such as urinary protein, fundus  
9 examination, blood vessel and nerve conduction. Initially, all patients with high blood glucose  
10 were identified and classified by the diabetes identification center. Electronic medical records  
11 were generated at this time. Next, the patients entered the metabolic disease management  
12 center to complete the screening for diabetic retinopathy. Concurrently, the diabetes nursing  
13 team undertook the measurement of height, weight and blood pressure, and gathered  
14 information about smoking, drinking and past disease history.

15  
16  
17  
18  
19  
20  
21  
22 **Participants:** Study participants were newly diagnosed type 2 diabetic patients who visited the  
23 Metabolic Disease Management center of the Tianjin 4th Central Hospital from December 2018  
24 to April 2019. The patients information came from an electronic database of newly diagnosed  
25 type 2 diabetics at the hospital's diabetes identification center. All the patients who  
26 underwent fundus examination were enrolled in this study. All patient identifiers were  
27 removed prior to analysis. This clinical study protocol was approved by the institutional review  
28 board of Tianjin 4th Central Hospital, and all steps were conducted in accordance with the  
29 principles the World Medical Association Declaration of Helsinki.<sup>9</sup> (Trial registration code:  
30 ChiCTR1900020728). Written informed consent was obtained from each patient.

#### 31 32 33 34 35 36 37 38 39 **Inclusion criteria:**

40  
41 The study enrolled participants with a baseline of newly diagnosed with T2DM within past six  
42 months; patients who could communicate independently and describe their smoking status;  
43 none of the smokers had given up smoking before the study; all patients underwent diabetic  
44 retinopathy screening in the study.

45  
46  
47  
48 According to the Chinese guidelines for the prevention and treatment of diabetes, all  
49 patients with diabetes in our hospital need to be diagnosed by an oral glucose tolerance test. The  
50 diagnostic criteria during execution are as follows:(1)Fasting plasma glucose(FPG) $\geq$ 7.0mmol/l.  
51 Fasting is defined as no caloric intake for at least 8h; Or(2)2-h plasma glucose $\geq$ 11.1mmol/l during  
52 an oral glucose tolerance test(OGTT). The test should be performed as described by the World  
53 Health Organization, using a glucose load containing the equivalent of 75 g anhydrous glucose  
54 dissolved in the water. HbA1c test is not standardized in China, so it cannot be used as a

1  
2  
3 diagnostic standard.<sup>10</sup>  
4  
5  
6  
7

8 **Exclusion criteria:**  
9

10 Exclusion criteria : Type 1 diabetes and other specific types of diabetes; acute complications of  
11 diabetes, such as diabetic ketoacidosis or lactic acidosis; hypovolaemia; subjects with diabetic  
12 nephropathy complications, rheumatic diseases, autoimmune diseases, pregnancy, malignant  
13 tumors, infection, foot ulcer, severe mental illness, thyroid dysfunction, severe hepatic  
14 insufficiency or renal insufficiency, severe anemia, heart failure or respiratory insufficiency;  
15 cognitive impairment, and communication disorders.  
16  
17  
18  
19

20  
21  
22 **Evaluation of Clinical variables:**  
23

24 Information about patients' names, sex, phone numbers, Body mass index (BMI), age, smoking  
25 history, drinking history, family history of DM, hypertension and HbA1c was collected by using a  
26 uniform information table. The formula for BMI is weight in kilograms divided by height in  
27 meters squared. BMI ( $\geq 28 \text{ kg/m}^2$ ) met obesity criteria according to Chinese standards. Venous  
28 blood samples were collected by EDTA tubes in fasting state in the morning. The level of HbA1c  
29 was determined by affinity chromatography in the hospital standard laboratory (**Tosoh**  
30 **Corporation, Japan**). Smoking status assessment: according to the WHO (1984) smoking survey  
31 method, smoking at least one cigarette per day for more than one year is considered as a  
32 smoking history. The smoking index is calculated by multiplying the number of cigarettes smoked  
33 per day by the number of years the person has smoked. In our study, according to the smoking  
34 index, 0 means non-smoking,  $\leq 500$  means light and moderate smoking, and  $> 500$  means heavy  
35 smoking. of T2DM, subjects were divided into two groups according to the age of diagnosis ( $\geq 40$   
36 or  $< 40$  years old).<sup>11</sup>  
37  
38  
39  
40  
41  
42  
43  
44

45 Screening for DR was carried out according to EURODIAB guidelines using one  $45^\circ$  field  
46 retinograph, centered on the fovea. If DR was suspected, another two  $45^\circ$  retinographs of were  
47 taken.<sup>12</sup> Ophthalmologists judged whether the patient had DR or not according to the results of  
48 the funduscopic examination and guidelines. In this study, the results were reported as either  
49 positive or negative (diabetic retinopathy DR or non-diabetic retinopathy NDR), and the patients  
50 were divided into two groups (DR group and NDR group). Non-diabetic retinopathy here  
51 includes a normal fundus and other retinopathy that may be caused by other causes  
52 (non-diabetic) such as fundus arteriosclerosis.  
53  
54  
55  
56  
57  
58  
59  
60

### Statistical analysis:

Descriptive analysis was used to illustrate the basic demographic characteristics and past medical history of the enrolled population. For continuous variables, one sample Kolmogorov-Smirnov Normality test was used to check normality of the distribution of such variables. Once normal distribution and homogeneity of variance were satisfied, values were represented by the mean  $\pm$ SD and student t-test was used to compare the difference between two groups. For categorical variables, chi-squared test was performed. The occurrence of DR was identified as the dependent variable, and the related factors (sex, hypertension, age at DM diagnosis, family history of diabetes, drinking history, HbA1c, BMI and smoking status) were listed as independent variables. We examined the factors associated with DR using a multivariable logistic regression analysis. BMI could be a possible confounding variable. According to whether  $BMI \geq 28\text{kg/m}^2$ , multiple regression analysis was made on the above factors. All the analyses were conducted using SPSS 16.0 software. A significant difference exists if  $p < 0.05$  (two-sides).

### Patient and Public Involvement:

Patients were not involved in setting the research questions or planning the study. Investigators did not know the identities of the study participants. In this study, we accessed patient's electronic data from the health records at our institution. All patient identifiers were removed before the analysis was conducted. There was no direct patient and public involvement.

### Results:

The flow chart of the cross-sectional study is shown in Figure 1. Initially, 952 patients entered the study and 5 were excluded because we were unable to see the fundus. Finally, a total of 947 patients were enrolled in the study. 430 patients had a history of smoking. The average smoking commencement age was  $27.8 \pm 12.2$  years (2~60 years). They smoked  $21.8 \pm 12.3$  cigarettes per day. Baseline characteristics are shown in Table 1.

The comparison of clinical data between DR and NDR groups is shown in Table 2. There was no statistically significant difference between the two groups in sex, age, hypertension, proportion of patients with DM diagnosed age <40 years old, family history of diabetes, drinking history and HbA1c. BMI was significantly higher in DR patients ( $27.7 \pm 4.2$  vs  $26.7 \pm 4.4$ ,  $p = 0.004$ ). We found that smoking status was different between the two groups ( $\chi^2 = 6.350$ ,  $p = 0.042$ ).

The occurrence of DR was identified as the dependent variable, and the related risk factors were listed as independent variables. Both of the variables were progressed through a multivariate logistic regression analysis in Table 3. Patients with BMI $\geq$ 28kg/m<sup>2</sup> were less likely to have DR in newly diagnosed diabetic patients (OR=0.634, p=0.012).

The average age of newly T2DM patients with obesity was 50.4 $\pm$ 12.4 years, while that of patients without obesity was 55.1 $\pm$ 10.6 years. The former was significantly lower than the latter (t=6.094, p<0.001). Because the onset of T2DM is insidious, patients may have a long history before diagnosis.<sup>3</sup> BMI could be a possible confounding variable. We divided the participants into two groups according to whether BMI was  $\geq$  28 kg/m<sup>2</sup>. We compared the incidence of DR in patients with different smoking status (Figure 2), and used logistic regression analysis to analysis the related factors of DR (Table 4). When BMI was  $\geq$ 28 kg/m<sup>2</sup>, we found that heavy smoking was significantly associated with DR (OR=2.336, p=0.027).

**Table 1** Baseline characteristics of participants with newly diagnosed T2DM.

| Characteristics of participants                 | Comment                    | Statistical description |
|-------------------------------------------------|----------------------------|-------------------------|
| Sex (n, %)                                      | Male                       | 566 (59.78%)            |
| Age (years)                                     |                            | 53.2 $\pm$ 11.6         |
| Family history of DM (n, %)                     |                            | 580 (61.2%)             |
| Age at diagnosis of DM (n, %)                   | < 40 years old             | 147 (15.5%)             |
| HbA1c (%)                                       |                            | 9.53 $\pm$ 2.13         |
| BMI (kg/m <sup>2</sup> )                        |                            | 27.5 $\pm$ 4.3          |
| Hypertension (n, %)                             |                            | 498 (52.6%)             |
| Drinking history (n,%)                          |                            | 195 (20.6%)             |
| Smoking status (n, %)                           | Non-smoking                | 517 (54.6%)             |
|                                                 | Light and moderate smoking | 212 (22.4%)             |
|                                                 | Heavy smoking              | 218 (23.0%)             |
| The number of years a person has smoked (years) |                            | 27.8 $\pm$ 12.2         |

|            |             |
|------------|-------------|
| DR (n, %)  | 192 (20.3%) |
| PDR (n, %) | 12 (1.3%)   |

Abbreviations: DR, diabetic retinopathy; PDR, proliferative diabetic retinopathy.

**Table 2** Comparison of clinical data between DR and NDR groups

| Items                     |                   | NDR<br>(n=755) | DR<br>(n=192) | t/ $\chi^2$         | P value |
|---------------------------|-------------------|----------------|---------------|---------------------|---------|
| Sex                       | Male              | 447 (79.0%)    | 119 (21.0%)   | 0.490 <sup>a</sup>  | 0.510   |
|                           | Female            | 308 (80.8%)    | 73 (19.2%)    |                     |         |
| Age                       | years             | 53.3±11.7      | 52.9±11.1     | 0.350 <sup>b</sup>  | 0.726   |
| Family history of DM      | no                | 288 (78.5%)    | 79 (21.5%)    | 0.580 <sup>a</sup>  | 0.456   |
|                           | yes               | 467 (80.5%)    | 113 (19.5%)   |                     |         |
| Drinking history          | no                | 608 (80.9%)    | 144 (19.1%)   | 2.863 <sup>a</sup>  | 0.109   |
|                           | yes               | 147 (75.4%)    | 48 (24.6%)    |                     |         |
| Hypertension <sup>c</sup> | no                | 349 (81.2%)    | 81 (18.8%)    | 1.457 <sup>a</sup>  | 0.265   |
|                           | yes               | 392 (78.7%)    | 106 (21.3%)   |                     |         |
| DM diagnosed age <40      | no                | 123 (83.7%)    | 24 (16.3%)    | 1.678 <sup>a</sup>  | 0.220   |
|                           | yes               | 632 (79.0%)    | 168 (21.0%)   |                     |         |
| HbA1c                     | %                 | 9.51±2.13      | 9.60±2.12     | -0.546 <sup>b</sup> | 0.585   |
| BMI                       | kg/m <sup>2</sup> | 27.7±4.2       | 26.7±4.4      | 2.921 <sup>b</sup>  | 0.004   |
| Smoking history           | no                | 424(82.0%)     | 93(18.0%)     | 3.682 <sup>b</sup>  | 0.062   |
|                           | yes               | 331(77.0%)     | 99(23.0%)     |                     |         |
| Smoking status            | Non-              | 424 (82.0%)    | 93 (18.0%)    | 6.350 <sup>a</sup>  | 0.042   |

## smoking

|                            |             |            |
|----------------------------|-------------|------------|
| Light and moderate smoking | 170 (80.2%) | 42 (19.8%) |
| Heavy smoking              | 161 (73.9%) | 57 (26.1%) |

Note: <sup>a</sup> chi-square test , <sup>b</sup> student t test and <sup>c</sup>19 cases of patients with missing data. There was no statistically significant difference if p >0.05.

**Table 3** Logistic regression analysis of related factors for DR

| Independent variables      | B      | SE    | Wald $\chi^2$ | P value | OR    | 95%CI       |
|----------------------------|--------|-------|---------------|---------|-------|-------------|
| Sex                        | 0.085  | 0.224 | 0.144         | 0.705   | 1.089 | 0.702-1.688 |
| Hypertension               | 0.171  | 0.172 | 0.993         | 0.319   | 1.187 | 0.847-1.663 |
| Drinking history           | 0.178  | 0.219 | 0.659         | 0.417   | 1.195 | 0.778-1.835 |
| HbA1c                      | 0.075  | 0.168 | 0.197         | 0.657   | 1.077 | 0.775-1.498 |
| BMI                        | -0.456 | 0.181 | 6.334         | 0.012   | 0.634 | 0.445-0.904 |
| Family history of DM       | -0.125 | 0.170 | 0.547         | 0.460   | 0.882 | 0.633-1.230 |
| DM diagnosed age <40 years | 0.011  | 0.263 | 0.002         | 0.966   | 1.011 | 0.604-1.692 |
| Smoking status             |        |       | 3.479         | 0.176   |       |             |
| Light and moderate smoking | 0.087  | 0.249 | 0.121         | 0.728   | 1.091 | 0.669-1.777 |
| Heavy smoking              | 0.427  | 0.244 | 3.056         | 0.080   | 1.533 | 0.950-2.474 |
| Constant                   | -1.579 | 0.631 | 6.259         | 0.012   | 0.206 |             |

Note: assignment instructions as follows---Sex (male 1, female 2); BMI(<28 0,  $\geq$ 28 1); HbA1c( $\leq$ 9% 0, >9 1); Hypertension、drinking history、family history of DM and DM diagnosed age <40 years no 0, yes 1; Smoking status non-smoking 0, light and moderate smoking 1, heavy smoking 2, non-smoking as the reference.

**Table 4** Logistic regression analysis of related factors for DR (BMI<28kg/m<sup>2</sup>,  $\geq$ 28kg/m<sup>2</sup>)

| Independent variables       |                            | B      | SE    | Wald $\chi^2$ | P value | OR          | 95%CI       |
|-----------------------------|----------------------------|--------|-------|---------------|---------|-------------|-------------|
| BMI<28<br>kg/m <sup>2</sup> | Sex                        | -0.167 | 0.283 | 0.347         | 0.556   | 1.182       | 0.678-2.060 |
|                             | Hypertension               | 0.070  | 0.212 | 0.107         | 0.743   | 1.072       | 0.707-1.625 |
|                             | Drinking history           | 0.059  | 0.275 | 0.046         | 0.830   | 1.061       | 0.619-1.817 |
|                             | HbA1c                      | -0.025 | 0.205 | 0.015         | 0.902   | 0.975       | 0.653-1.457 |
|                             | Family history of DM       | -0.368 | 0.204 | 3.247         | 0.072   | 0.692       | 0.464-1.033 |
|                             | DM diagnosed age <40 years | 0.099  | 0.380 | 0.068         | 0.794   | 1.104       | 0.525-2.324 |
|                             | Smoking status             |        |       | 1.037         | 0.595   |             |             |
|                             | Light and moderate smoking | 0.278  | 0.318 | 0.766         | 0.382   | 1.321       | 0.720-2.506 |
| Heavy smoking               | 0.295                      | 0.318  | 0.858 | 0.354         | 1.343   | 0.950-2.474 |             |
| BMI≥28<br>kg/m <sup>2</sup> | Sex                        | -0.009 | 0.382 | 0.001         | 0.980   | 0.991       | 0.468-2.096 |
|                             | Hypertension               | 0.345  | 0.313 | 1.220         | 0.269   | 1.412       | 0.765-2.607 |
|                             | Drinking history           | 0.465  | 0.377 | 1.526         | 0.217   | 1.592       | 0.761-3.331 |
|                             | HbA1c                      | 0.335  | 0.304 | 1.213         | 0.271   | 1.398       | 0.770-2.536 |
|                             | Family history of DM       | 0.449  | 0.325 | 1.905         | 0.167   | 1.566       | 0.828-2.962 |
|                             | DM diagnosed age <40 years | 0.046  | 0.376 | 0.015         | 0.902   | 1.047       | 0.501-2.187 |
|                             | Smoking status             |        |       | 7.156         | 0.028   |             |             |
|                             | Light and moderate smoking | -0.173 | 0.422 | 0.169         | 0.681   | 0.841       | 0.368-1.922 |
| Heavy smoking               | 0.848                      | 0.384  | 4.879 | 0.027         | 2.336   | 1.100-4.960 |             |

## Discussion:

### Overall results of this survey:

In the study, among the newly diagnosed T2DM patients 20.3% presented with DR. After

1  
2  
3 analyzing the related factors of DR in newly diagnosed T2DM patients, our study found that  
4 obese patients may have a lower incidence of DR (OR=0.634, p=0.012). Many researchers have  
5 shown that duration of DM, blood glucose, blood pressure and blood lipids are important risk  
6 factors for DR.<sup>13-15</sup> The duration is the most important factor.<sup>16</sup> But in our study, we found that  
7 DR was only related to body mass index and smoking in newly diagnosed T2DM patients. To the  
8 best of our knowledge, the present study is the first one that is designed to investigate the  
9 correlation between smoking level and DR in newly diagnosed patients with T2DM. The results of  
10 the study suggest that heavy smoking was associated with DR in obese (BMI  $\geq$  28kg/m<sup>2</sup>) newly  
11 diagnosed T2DM patients (OR=2.336, p=0.027), while heavy smoking was not associated with DR  
12 in non-obese (BMI<28kg/m<sup>2</sup>) subjects (OR=1.343,p=0.354). .

### 19 **The relationship between BMI and DR**

21 In the study, we found that DR was negatively correlated with BMI. This is not consistent  
22 with other research results. Gray et al. followed up 14,657 diabetic patients for an average of  
23 6.68 years and found that increased risk of DR was associated with higher BMI.<sup>17</sup> It had also been  
24 reported that BMI was not correlated or even negatively correlated with DR.<sup>18</sup> The subjects in  
25 our study had newly diagnosed type 2 diabetes mellitus. The average age of newly T2DM  
26 patients with obesity (BMI $\geq$ 28kg/m<sup>2</sup>) was 50.4  $\pm$  12.4 years, while that of patients without  
27 obesity was 55.1  $\pm$  10.6 years. The former was significantly lower than the latter (t=6.094,  
28 p<0.001). As the onset of T2DM is insidious, patients may have had a long history before  
29 diagnosis.<sup>3</sup> Based on the usual clinical experience and their different diagnostic ages, our study  
30 suggests that the diagnostic age of T2DM patients with obesity is closer to the real age of onset.  
31 Perhaps because non-obese patients may be confused with more complex diabetic course  
32 factors, we did not find any factors in the analysis of the related factors of DR. In conclusion, we  
33 don't think that high BMI is a protective factor for DR. It is very likely that there are confounding  
34 factors, such as an unobserved course of T2DM.

### 43 **The relationship between smoking and DR:**

45 Cigarette smoking is a well-known risk factor for many chronic diseases, including  
46 cardiovascular diseases and various malignancies. Smoking is associated with higher insulin  
47 resistance, chronic inflammation, and dyslipidemia. Smoking is strongly linked with both increased  
48 incidence as well as severity of diabetes. Smoking has also been shown to be associated with a  
49 higher risk of diabetes complications especially macrovascular complications. Smoking cessation is  
50 one of the important targets for diabetes control and the prevention of chronic diabetes  
51 complications.<sup>19</sup> When BMI was  $\geq$ 28 kg/m<sup>2</sup>, we found that the incidence of DR was 12.4% in  
52 non-smokers, 12.1% in light and moderate smokers, and 28.2% in heavy smokers  
53 ( $\chi^2=11.163,p=0.004$ ). Many researchers have reported the negative effects of smoking on DM.<sup>7</sup>



1  
2  
3  
4  
5  
6  
7  
8  
9  
10  
11  
12  
13  
14  
15  
16  
17  
18  
19  
20  
21  
22  
23  
24  
25  
26  
27  
28  
29  
30  
31  
32  
33  
34  
35  
36  
37  
38  
39  
40  
41  
42  
43  
44  
45  
46  
47  
48  
49  
50  
51  
52  
53  
54  
55  
56  
57  
58  
59  
60

<sup>20-21</sup> A 14-year prospective cohort study in South Korea showed that the risk of DM among men and women who smoked 20 or more cigarettes a day was 1.55 times higher than in non-smokers.<sup>7</sup> Cigarette smoking is independently associated with the incidence of type 2 diabetes mellitus.<sup>22</sup> Although the mechanisms involved in the association are not clear yet. Smoking is associated with insulin resistance, inflammation and dyslipidemia.<sup>23-24</sup> Some studies have reported that no association was found between smoking and retinopathy in patients with T2DM.<sup>25</sup> The United Kingdom Prospective Diabetic (UKPD) study which followed patients over 6 years from diagnosis of Type II (non-insulin-dependent) diabetes mellitus. in order to determine risk factors related to the incidence and progression of diabetic retinopathy found that the development of retinopathy was associated with glycemia and higher blood pressure, but not smoking.<sup>26</sup>

Studies have shown that cigarette smoking impairs nitric oxide-mediated endothelial function via increased generation of superoxide anions, which may increase the risk of diabetic retinopathy in diabetic patients and could cause eye tissue ischemia, eye tissue hypoxia, retinal arteriosclerosis and decrease of choroidal blood flow, eventually leading to retinal ischemia.<sup>27-28</sup> This finally leads to DR . Based on the usual clinical experience and their different diagnostic ages, our study suggests that the diagnostic age of T2DM patients with obesity is closer to the real age of onset. When BMI was  $\geq 28$  kg/m<sup>2</sup>, present study shows that the incidence of DR was 28.2% in heavy smokers. Heavy smoking was significantly associated with DR. Arterial stiffness has been associated with diabetic retinopathy. A Logistic regression model was used to evaluate the relationship between diabetic retinopathy and pulse wave velocity and enhancement index, and this concluded that central arterial stiffness was associated with the presence and severity of diabetic retinopathy in type 2 diabetes mellitus patients, suggesting its etiologic is implicated in diabetic retinopathy.<sup>29</sup> Smoking may aggravate retinopathy damage by increasing arteriosclerosis. Diabetic retinopathy remains the leading cause of acquired blindness in working-age adults. While the cutting-edge research in the field has identified many molecular, functional, and structural abnormalities, the exact molecular mechanism of this devastating disease remains obscure.<sup>30</sup> A diabetic environment drives the dysfunction of the power generator of the cell and disturbs the homeostasis of the mitochondrial dynamic. Mitochondria appear to have a significant role in the development of diabetic retinopathy, and unraveling the mechanism responsible for their damage as well as the role of epigenetic modifications in mitochondrial homeostasis should identify novel therapeutic targets.<sup>30</sup> Further research is needed to determine whether smoking affects mitochondrial DNA function.

In the present study, DR was found in 20.3% of newly diagnosed type 2 diabetic patients. This was consistent with other findings.<sup>3</sup> The traditional explanation of this phenomenon is that the onset of T2DM is usually insidious, and many patients with diabetes have been suffering

1  
2  
3 from diabetes for many years before diagnosis.<sup>3</sup> In our investigation, the incidence of DR was  
4 18.0% in non-smokers, 19.8% in light and moderate smokers, and 26.1% in heavy smokers.  
5  
6 Although we cannot completely rule out the relevance between known duration of DM and the  
7 prevalence of DR, our study suggests that smoking may be an important related factor for the  
8 occurrence of DR in newly diagnosed diabetic patients. Tyrberg M et al. investigated 794 patients  
9 diagnosed with diabetes in 1987-1988 and found that smoking history could increase the risk of  
10 diabetic retinopathy during the 9 to 17 years after diagnosis.<sup>31</sup> Because smoking behavior occurs  
11 before the diagnosis of T2DM in this study, heavy smoking is very likely to be a risk factor for DR.  
12  
13 Prospective research is needed to confirm this view.  
14  
15  
16  
17  
18  
19

### 20 **Limitations of the study**

21  
22 The study is a single-center cross-sectional study. The results only show the correlation  
23 between smoking and diabetic retinopathy. Prospective cohort studies are needed to confirm  
24 whether there is a causal relationship between smoking and DR in newly diagnosed T2DM  
25 patients. Because of the large number of newly diagnosed type 2 diabetes patients, we have  
26 set relatively wide exclusion criteria for the population, which may affect external validity.  
27 Although our department is responsible for the first diagnosis and identification of diabetes in  
28 Tianjin, it is still unable to achieve a timely diagnosis for all those patients who newly develop  
29 diabetes. Because the patients are all from Tianjin, China, the conclusion has got regional  
30 limitations.  
31  
32  
33  
34  
35  
36  
37  
38

### 39 **Conclusion**

40  
41 Our study found that heavy smoking was an important related factor for the occurrence of  
42 DR in newly diagnosed diabetes mellitus patients when BMI was  $\geq 28$  kg/m<sup>2</sup>. Although our study  
43 subjects were with all newly diagnosed patients, it was known that the onset of type 2 diabetes  
44 mellitus had been relatively insidious; especially HbA1c levels of all subjects of our study were  
45 higher than 9%. So the course of their disease may have lasted for a prolonged period of time.  
46 And we can also speculate that DR is associated with smoking status in pre-diabetes. It is of great  
47 importance for people in populations at high-risk of diabetes mellitus to quit smoking. Therefore,  
48 to elucidate the correlation clearly, we need to do a long-term cohort study with large sample to  
49 confirm this.  
50  
51  
52  
53  
54

### 55 **Acknowledgements**

56  
57 This work was supported by National Key R&D Program of China(2018YFC1314000) and Tianjin  
58  
59  
60

1  
2  
3 Science and Technology Development Strategy Research Projects(18ZLZXZF00740).  
4

5 **Competing interests:** None declared.  
6  
7

8 **Patient consent:** Obtained.  
9

10 **Ethics approval:** This study was approved by the IRB of Tianjin 4th Central  
11 Hospital(2017-SZXL017) and the Chinese Clinical Trial Registry (No. ChiCTR1900020728).  
12  
13

14 **Provenance and peer review:** Not commissioned; externally peer reviewed.  
15

16 **Contributors:** Zhaohu Hao wrote the manuscript. Xiao Huang was in charge of fundus  
17 examination. Yongzhang Qin was responsible for basic information collection. Hailin Shao was  
18 responsible for the statistical analysis of the data. Huanming Li was responsible for auditing the  
19 fundus images and reports. Rong Xu was responsible for keeping patients in order. Baocheng  
20 Chang proposed the necessity and design of the study. Fengshi Tian was the director of our  
21 department and also provided project support for the research.  
22  
23  
24

25 **Data sharing statement:** Data is available upon reasonable request.  
26  
27

#### 28 **References:** 29

- 30 1.American Diabetes Association.(2017). Classification and diagnosis of diabetes. *Diabetes Care*, 40(suppl  
31 1):S11-S24.  
32
- 33 2.Wang L , Gao P , Zhang M , et al. Prevalence and Ethnic Pattern of Diabetes and Prediabetes in China in 2013.  
34 *JAMA* 2017;317(24):2515-2523.  
35
- 36 3.Yau J W Y , Rogers S , Kawasaki R . Global prevalence and major risk factors of diabetic retinopathy. *Diabetes*  
37 *Care* 2012; 35(3):556-564.  
38
- 39 4.Pang C, Jia L, Jiang S, et al.Determination of diabetic retinopathy prevalence and associated risk factors in  
40 Chinese diabetic and pre-diabetic subjects: Shanghai diabetic complications study. *Diabetes Metab Res Rev*  
41 2012;28(3):276-283.  
42
- 43 5.Mellitus, E.C.O.O. D. . (2002). American diabetes association: clinical practice recommendations 2002. *Diabetes*  
44 *Care*, 25 Suppl 1, S1-147.  
45
- 46 6.GBD 2015 Risk Factors Collaborators.(2016).Global, regional, and national comparative risk assessment of 79  
47 behavioural, environmental and occupational, and metabolic risks or clusters of risks,1990-2015: a systematic  
48 analysis for the Global Burden of Disease Study 2015. *Lancet*,388(10053):1659-1724.  
49
- 50 7.Jee S H , Foong A W , Hur N W , et al. Smoking and Risk for Diabetes Incidence and Mortality in Korean Men  
51  
52  
53  
54  
55  
56  
57  
58  
59  
60

1  
2  
3 and Women. *Diabetes Care* 2010; 33(12):2567-2572.

4  
5  
6 8. Matthews DR, Cull CA, Stratton IM, et al. UKPDS 26: Sulphonylurea failure in non-insulin-dependent diabetic  
7 patients over six years. *Diabetic Medicine A Journal of the British Diabetic Association* 1998;15(4):297-303.

8  
9  
10 9. General Assembly of the World Medical Association. (2014). World Medical Association Declaration of  
11 Helsinki: ethical principles for medical research involving human subjects. *The Journal of the American College of*  
12 *Dentists*, 81:14-18.

13  
14  
15 10. Xu Y, Wang L, He J, et al. Prevalence and Control of Diabetes in Chinese Adults. *JAMA* 2013; 310(9):948-959.

16  
17 11. George DC, Chakraborty C, Haneef SA, et al. Evolution- and structure-based computational strategy reveals  
18 the impact of deleterious missense mutations on *mody 2* (maturity-onset diabetes of the young, type  
19 2). *Theranostics* 2014;4(4), 366-385.

20  
21  
22 12. Romero P, Sagarra R, Ferrer J, et al. The incorporation of family physicians in the assessment of diabetic  
23 retinopathy by non-mydiatic fundus camera. *Diabetes Res Clin Pract* 2010;88(2), 0-188.

24  
25  
26 13. Van Leiden H A, Dekker J M, Moll A C, et al. Blood Pressure, Lipids, and Obesity Are Associated With  
27 Retinopathy: The Hoorn Study. *Diabetes Care* 2002; 25(8):1320-1325.

28  
29  
30 14. Kumari N, Bhargava M, Nguyen DQ, et al. Six-year incidence and progression of diabetic retinopathy in Indian  
31 adults: the Singapore Indian Eye study. *Br J Ophthalmol* 2019;0:1-8.

32  
33  
34 15. Kawasaki R, Kitano S, Sato Y, et al. Factors associated with non-proliferative diabetic retinopathy in patients  
35 with type 1 and type 2 diabetes: the Japan Diabetes Complication and its Prevention prospective study (JDCP  
36 study 4). *Diabetology International* 2019;10:3-11.

37  
38  
39 16. Cohen O, Norymberg K, Neumann E, et al. Complication-Free Duration and the Risk of Development of  
40 Retinopathy in Elderly Diabetic Patients[J]. *Archives of Internal Medicine*, 1998, 158(6):641-644.

41  
42  
43 17. Gray N, Picone G, Sloan F, et al. Relation between BMI and Diabetes Mellitus and Its Complications among  
44 US Older Adults. *Southern Medical Journal*, 2015, 108(1):29-36.

45  
46  
47 18. Rooney D, Lye W K, Tan G, et al. Body mass index and retinopathy in Asian populations with diabetes  
48 mellitus. *Acta Diabetologica*, 2015, 52(1):73-80.

49  
50  
51 19. Aggarwal S, Khandelwal D, Dutta D, et al. (2019) Diabetes and Smoking: The Burden of Evidence. In:  
52 Rodriguez-Saldana J. (eds) *The Diabetes Textbook*. Springer, Cham.

53  
54  
55 20. Kim S, Jee S, Nam J, et al. Do early onset and pack-years of smoking increase risk of type II diabetes?. *BMC*  
56 *Public Health* 2014;14(1):178.

- 1  
2  
3  
4 21.Pan A, Wang Y, Talaei M, et al. Relation of active, passive, and quitting smoking with incident type 2 diabetes: a  
5 systematic review and meta-analysis. *The Lancet Diabetes & Endocrinology* 2015;3(12):958-967.  
6  
7  
8 22.Sung Y T , Hsiao C T , Chang I J , et al. Smoking Cessation Carries a Short-Term Rising Risk for Newly  
9 Diagnosed Diabetes Mellitus Independently of Weight Gain: A 6-Year Retrospective Cohort Study. *Journal of*  
10 *Diabetes Research* 2016; 2016:1-7.  
11  
12  
13 23.Ah C S. Smoking and Type 2 Diabetes Mellitus. *Diabetes & Metabolism Journal* 2012; 36(6):399-403.  
14  
15 24.Hilawe E H , Yatsuya H , Li Y , et al. Smoking and Diabetes: Is the Association Mediated by Adiponectin, Leptin,  
16 or C-reactive Protein?. *Journal of Epidemiology* 2015;25(2):99-109.  
17  
18  
19 25.Moss S E , Klein R , Klein B E K . Cigarette Smoking and Ten-year Progression of Diabetic Retinopathy.  
20 *Ophthalmology* 1996;103(9):1438-1442.  
21  
22  
23 26.Stratton I M , Kohner E M , Aldington S J , et al. UKPDS 50: Risk factors for incidence and progression of  
24 retinopathy in Type II diabetes over 6 years from diagnosis. *Diabetologia* 2001; 44(2):156-163.  
25  
26  
27 27.Tsuneaki O , Taiji N , Akitoshi Y . Effects of Habitual Cigarette Smoking on Retinal Circulation in Patients With  
28 Type 2 Diabetes. *Investigative Ophthalmology & Visual Science* 2016; 57(3):1345-1351.  
29  
30  
31 28.Jaimes E A , Demaster E G , Tian R X , et al. Stable Compounds of Cigarette Smoke Induce Endothelial  
32 Superoxide Anion Production via NADPH Oxidase Activation. *Arterioscler Thromb Vasc Biol* 2004;  
33 24(6):1031-1036.  
34  
35  
36 29.Zhang X, Lim SC, Tavintharan S, et al. Association of central arterial stiffness with the presence and severity of  
37 diabetic retinopathy in Asians with type 2 diabetes. *Diab Vasc Dis Res* 2019;3:1-8.  
38  
39  
40 30.Kowluru R A . Mitochondrial Stability in Diabetic Retinopathy: Lessons Learned From Epigenetics. *Diabetes*  
41 2019; 68(2):241-247.  
42  
43  
44 31.Tyrberg M , Nyström L, Arnqvist H J , et al. Overweight, hyperglycemia and tobacco use are modifiable risk  
45 factors for onset of retinopathy 9 and 17, years after the diagnosis of diabetes- A retrospective observational  
46 nation-wide cohort study. *Diabetes Research and Clinical Practice* 2017;133:21-29.  
47  
48  
49  
50

51 **Figure 1** Flow chart of the study.

52  
53 **Abbreviations:** BMI, body mass index; SI, smoking index; DR, diabetic retinopathy; NDR, non-diabetic  
54 retinopathy; DM, diabetes mellitus.  
55  
56  
57  
58  
59  
60

1  
2  
3 **Figure 2** The incidence of DR in patients with different smoking status  
4

5  
6 Note: There was no difference in DR incidence among patients with different smoking  
7 status( $BMI < 28 \text{ kg/m}^2, \chi^2 = 0.901, p = 0.634$ ); When the patients were obese( $BMI \geq 28 \text{ kg/m}^2$ ), the DR  
8 detection rate of severe smokers was significantly higher( $\chi^2 = 11.163, p = 0.004$ ).  
9  
10  
11  
12  
13  
14  
15  
16  
17  
18  
19  
20  
21  
22  
23  
24  
25  
26  
27  
28  
29  
30  
31  
32  
33  
34  
35  
36  
37  
38  
39  
40  
41  
42  
43  
44  
45  
46  
47  
48  
49  
50  
51  
52  
53  
54  
55  
56  
57  
58  
59  
60

For peer review only

1  
2  
3  
4  
5  
6  
7  
8  
9  
10  
11  
12  
13  
14  
15  
16  
17  
18  
19  
20  
21  
22  
23  
24  
25  
26  
27  
28  
29  
30  
31  
32  
33  
34  
35  
36  
37  
38  
39  
40  
41  
42  
43  
44  
45  
46  
47  
48  
49  
50  
51  
52  
53  
54  
55  
56  
57  
58  
59  
60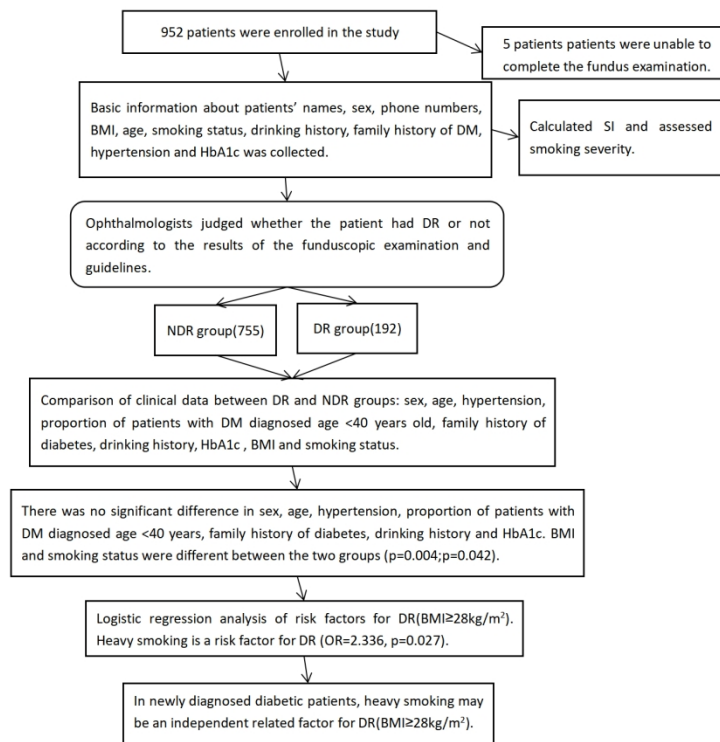

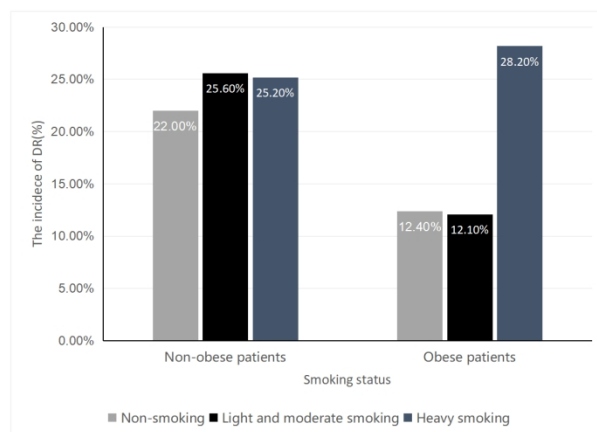

Figure 2 The incidence of DR in patients with different smoking status  
Note: There was no difference in DR incidence among patients with different smoking status( $BMI < 28 \text{ kg/m}^2$ ,  $\chi^2 = 0.901$ ,  $p = 0.634$ ); When the patients were obese( $BMI \geq 28 \text{ kg/m}^2$ ), the DR detection rate of severe smokers was significantly higher( $\chi^2 = 11.163$ ,  $p = 0.004$ ).

209x296mm (192 x 192 DPI)



1  
2  
3  
4  
5  
6  
7  
8  
9  
10  
11  
12  
13  
14  
15  
16  
17  
18  
19  
20  
21  
22  
23  
24  
25  
26  
27  
28  
29  
30  
31  
32  
33  
34  
35  
36  
37  
38  
39  
40  
41  
42  
43  
44  
45  
46  
47  
48  
49  
50  
51  
52  
53  
54  
55  
56  
57  
58  
59  
60STROBE Statement—Checklist of items that should be included in reports of *cross-sectional studies*

|                           | Item No | Recommendation                                                                                                                                                                                    | Page Number |
|---------------------------|---------|---------------------------------------------------------------------------------------------------------------------------------------------------------------------------------------------------|-------------|
| <b>Title and abstract</b> | 1       | (a) Indicate the study's design with a commonly used term in the title or the abstract                                                                                                            | 1           |
|                           |         | (b) Provide in the abstract an informative and balanced summary of what was done and what was found                                                                                               | 1-2         |
| <b>Introduction</b>       |         |                                                                                                                                                                                                   |             |
| Background/rationale      | 2       | Explain the scientific background and rationale for the investigation being reported                                                                                                              | 2           |
| Objectives                | 3       | State specific objectives, including any prespecified hypotheses                                                                                                                                  | 2-3         |
| <b>Methods</b>            |         |                                                                                                                                                                                                   |             |
| Study design              | 4       | Present key elements of study design early in the paper                                                                                                                                           | 3           |
| Setting                   | 5       | Describe the setting, locations, and relevant dates, including periods of recruitment, exposure, follow-up, and data collection                                                                   | 3-4         |
| Participants              | 6       | (a) Give the eligibility criteria, and the sources and methods of selection of participants                                                                                                       | 3-4         |
| Variables                 | 7       | Clearly define all outcomes, exposures, predictors, potential confounders, and effect modifiers. Give diagnostic criteria, if applicable                                                          | 4           |
| Data sources/measurement  | 8*      | For each variable of interest, give sources of data and details of methods of assessment (measurement). Describe comparability of assessment methods if there is more than one group              | 4           |
| Bias                      | 9       | Describe any efforts to address potential sources of bias                                                                                                                                         | none        |
| Study size                | 10      | Explain how the study size was arrived at                                                                                                                                                         | none        |
| Quantitative variables    | 11      | Explain how quantitative variables were handled in the analyses. If applicable, describe which groupings were chosen and why                                                                      | 4           |
| Statistical methods       | 12      | (a) Describe all statistical methods, including those used to control for confounding                                                                                                             | 4           |
|                           |         | (b) Describe any methods used to examine subgroups and interactions                                                                                                                               | 4           |
|                           |         | (c) Explain how missing data were addressed                                                                                                                                                       | none        |
|                           |         | (d) If applicable, describe analytical methods taking account of sampling strategy                                                                                                                | 4           |
|                           |         | (e) Describe any sensitivity analyses                                                                                                                                                             | 4           |
| <b>Results</b>            |         |                                                                                                                                                                                                   |             |
| Participants              | 13*     | (a) Report numbers of individuals at each stage of study—eg numbers potentially eligible, examined for eligibility, confirmed eligible, included in the study, completing follow-up, and analysed | 5           |
|                           |         | (b) Give reasons for non-participation at each stage                                                                                                                                              | none        |
|                           |         | (c) Consider use of a flow diagram                                                                                                                                                                | 5           |
| Descriptive data          | 14*     | (a) Give characteristics of study participants (eg demographic, clinical, social) and information on exposures and potential confounders                                                          | 5-6         |
|                           |         | (b) Indicate number of participants with missing data for each variable of interest                                                                                                               | 5           |
| Outcome data              | 15*     | Report numbers of outcome events or summary measures                                                                                                                                              | 5-6         |
| Main results              | 16      | (a) Give unadjusted estimates and, if applicable, confounder-adjusted estimates and their precision (eg, 95% confidence interval). Make clear                                                     | 5-6         |

|                          |    |                                                                                                                                                                            |      |
|--------------------------|----|----------------------------------------------------------------------------------------------------------------------------------------------------------------------------|------|
|                          |    | which confounders were adjusted for and why they were included                                                                                                             |      |
|                          |    | (b) Report category boundaries when continuous variables were categorized                                                                                                  | 6    |
|                          |    | (c) If relevant, consider translating estimates of relative risk into absolute risk for a meaningful time period                                                           | none |
| Other analyses           | 17 | Report other analyses done—eg analyses of subgroups and interactions, and sensitivity analyses                                                                             | none |
| <b>Discussion</b>        |    |                                                                                                                                                                            |      |
| Key results              | 18 | Summarise key results with reference to study objectives                                                                                                                   | 7-9  |
| Limitations              | 19 | Discuss limitations of the study, taking into account sources of potential bias or imprecision. Discuss both direction and magnitude of any potential bias                 | 9    |
| Interpretation           | 20 | Give a cautious overall interpretation of results considering objectives, limitations, multiplicity of analyses, results from similar studies, and other relevant evidence | 9    |
| Generalisability         | 21 | Discuss the generalisability (external validity) of the study results                                                                                                      | none |
| <b>Other information</b> |    |                                                                                                                                                                            |      |
| Funding                  | 22 | Give the source of funding and the role of the funders for the present study and, if applicable, for the original study on which the present article is based              | 10   |

\*Give information separately for exposed and unexposed groups.

**Note:** An Explanation and Elaboration article discusses each checklist item and gives methodological background and published examples of transparent reporting. The STROBE checklist is best used in conjunction with this article (freely available on the Web sites of PLoS Medicine at <http://www.plosmedicine.org/>, Annals of Internal Medicine at <http://www.annals.org/>, and Epidemiology at <http://www.epidem.com/>). Information on the STROBE Initiative is available at [www.strobe-statement.org](http://www.strobe-statement.org).

# BMJ Open

## Analysis of factors related to diabetic retinopathy in newly diagnosed type 2 diabetic patients: a cross-sectional study.

|                                 |                                                                                                                                                                                                                                                                                                                                                                                                                                                                                                                                                                                                                                                                                                                                                                                                                  |
|---------------------------------|------------------------------------------------------------------------------------------------------------------------------------------------------------------------------------------------------------------------------------------------------------------------------------------------------------------------------------------------------------------------------------------------------------------------------------------------------------------------------------------------------------------------------------------------------------------------------------------------------------------------------------------------------------------------------------------------------------------------------------------------------------------------------------------------------------------|
| Journal:                        | <i>BMJ Open</i>                                                                                                                                                                                                                                                                                                                                                                                                                                                                                                                                                                                                                                                                                                                                                                                                  |
| Manuscript ID                   | bmjopen-2019-032095.R2                                                                                                                                                                                                                                                                                                                                                                                                                                                                                                                                                                                                                                                                                                                                                                                           |
| Article Type:                   | Original research                                                                                                                                                                                                                                                                                                                                                                                                                                                                                                                                                                                                                                                                                                                                                                                                |
| Date Submitted by the Author:   | 29-Nov-2019                                                                                                                                                                                                                                                                                                                                                                                                                                                                                                                                                                                                                                                                                                                                                                                                      |
| Complete List of Authors:       | Hao, Zhaohu; Tianjin Medical University, Tianjin Metabolic Diseases Hospital; Tianjin 4th Central Hospital, Metabolic Disease Management Center,<br>Huang, Xiao; Tianjin Medical University, Tianjin Metabolic Diseases Hospital<br>Qin, Yongzhang; Tianjin Medical University, Tianjin Metabolic Diseases Hospital; The First Affiliated Hospital of Gannan Medical University<br>Shao, Hailin; Tianjin 4th Central Hospital, Metabolic Disease Management Center,<br>Li, Huanming; Tianjin 4th Central Hospital, Metabolic Disease Management Center,<br>Xu, Rong; Tianjin 4th Central Hospital, Metabolic Disease Management Center,<br>Chang, Baocheng; Tianjin Medical University, Tianjin Metabolic Diseases Hospital<br>Tian, Fengshi; Tianjin 4th Central Hospital, Metabolic Disease Management Center, |
| <b>Primary Subject Heading</b>: | Diabetes and endocrinology                                                                                                                                                                                                                                                                                                                                                                                                                                                                                                                                                                                                                                                                                                                                                                                       |
| Secondary Subject Heading:      | Public health, Smoking and tobacco                                                                                                                                                                                                                                                                                                                                                                                                                                                                                                                                                                                                                                                                                                                                                                               |
| Keywords:                       | Smoking index, Diabetic retinopathy < DIABETES & ENDOCRINOLOGY, Type 2 diabetes mellitus, newly diagnosed diabetes mellitus                                                                                                                                                                                                                                                                                                                                                                                                                                                                                                                                                                                                                                                                                      |
|                                 |                                                                                                                                                                                                                                                                                                                                                                                                                                                                                                                                                                                                                                                                                                                                                                                                                  |

SCHOLARONE™  
Manuscripts



I, the Submitting Author has the right to grant and does grant on behalf of all authors of the Work (as defined in the below author licence), an exclusive licence and/or a non-exclusive licence for contributions from authors who are: i) UK Crown employees; ii) where BMJ has agreed a CC-BY licence shall apply, and/or iii) in accordance with the terms applicable for US Federal Government officers or employees acting as part of their official duties; on a worldwide, perpetual, irrevocable, royalty-free basis to BMJ Publishing Group Ltd ("BMJ") its licensees and where the relevant Journal is co-owned by BMJ to the co-owners of the Journal, to publish the Work in this journal and any other BMJ products and to exploit all rights, as set out in our [licence](#).

The Submitting Author accepts and understands that any supply made under these terms is made by BMJ to the Submitting Author unless you are acting as an employee on behalf of your employer or a postgraduate student of an affiliated institution which is paying any applicable article publishing charge ("APC") for Open Access articles. Where the Submitting Author wishes to make the Work available on an Open Access basis (and intends to pay the relevant APC), the terms of reuse of such Open Access shall be governed by a Creative Commons licence – details of these licences and which [Creative Commons](#) licence will apply to this Work are set out in our licence referred to above.

Other than as permitted in any relevant BMJ Author's Self Archiving Policies, I confirm this Work has not been accepted for publication elsewhere, is not being considered for publication elsewhere and does not duplicate material already published. I confirm all authors consent to publication of this Work and authorise the granting of this licence.

1  
2  
3 **Analysis of factors related to diabetic retinopathy in newly diagnosed type 2 diabetic patients:**  
4 **a cross-sectional study. ( Tables = 6)**  
5

6  
7 Zhaohu Hao<sup>1,2\*</sup> MD, Xiao Huang<sup>1\*</sup> RN, Yongzhang Qin<sup>1,3</sup>, Hailin Shao<sup>2</sup> MD, Huanming Li<sup>2</sup> MD, Rong  
8 Xu<sup>2</sup> MD, Baocheng Chang<sup>1</sup> § MD, Fengshi Tian<sup>2</sup> § MD.  
9

10  
11 Author Affiliations:

12  
13 1 NHC Key Laboratory of Hormones and Development (Tianjin Medical University), Tianjin Key  
14 Laboratory of Metabolic Diseases, Tianjin Medical University Chu Hsien-I Memorial Hospital &  
15 Tianjin Institute of Endocrinology, Tianjin 300134, China  
16

17  
18 2 Department of Metabolic Disease Management Center, Tianjin 4th Central Hospital, The 4th  
19 Central Hospital Affiliated to Nankai University, The 4th Center Clinical College of Tianjin Medical  
20 University, 300140 Tianjin, China  
21

22  
23 3 Department of Endocrinology, The First Affiliated Hospital of Gannan Medical University,  
24 341000 Ganzhou, China  
25

26  
27 \*These authors contributed equally and are co-first authors of this article.  
28

29  
30 § Corresponding authors: Prof Baocheng Chang, NHC  
31 Key Laboratory of Hormones and Development (Tianjin Medical University), Tianjin Key  
32 Laboratory of Metabolic Diseases, Tianjin Medical University Chu Hsien-I Memorial Hospital &  
33 Tianjin Institute of Endocrinology, Tianjin 300134, China; Prof Fengshi Tian, Department of  
34 Metabolic Disease Management Center, Tianjin 4th Central Hospital, The 4th Central Hospital  
35 Affiliated to Nankai University, The 4th Center Clinical College of Tianjin Medical University, No.1  
36 Zhongshan Road, Tianjin 300140, China  
37

38  
39 Tel: +86- 02226249403; +86- 02226249281  
40

41  
42 E-mail: Changbaocheng2019@163.com  
43  
44  
45  
46  
47

48 **Abstract**

49  
50 **Aim:** To investigate the related factors of diabetic retinopathy(DR), and explore the correlation  
51 between smoking and DR in patients with newly diagnosed type 2 diabetes.  
52

53  
54 **Design:** A single-centre cross-sectional study.  
55

56  
57 **Setting:** Tianjin 4th Central Hospital.  
58

**Participants:** Patients with newly diagnosed type 2 diabetes who visited the outpatient department of the hospital from December 2018 to April 2019.

**Methods:** 947 patients were enrolled in the study. They were divided into two groups according to whether they were diagnosed with DR(diabetic retinopathy group,DR group and non diabetic retinopathy group,NDR group). The smoking index(SI) was calculated to assess smoking status. Factors such as sex, age, hypertension, T2DM diagnosed age, family history of diabetes, drinking history, HbA1c,body mass index(BMI) and smoking status were compared between two groups, and logistic regression was used to analyzing the relationship between DR and the above factors.

**Results** There was no statistically significant difference between the two groups in sex, age, hypertension, DM diagnosed age, family history of diabetes, drinking history and HbA1c. BMI was significantly higher in DR patients ( $27.7 \pm 4.2$  vs  $26.7 \pm 4.4$ ,  $p=0.004$ ). Smoking status was also different between the two groups ( $\chi^2=6.350$ ,  $p=0.042$ ). BMI was shown to be a related factor for DR in newly diagnosed diabetic patients (OR=0.587,  $p=0.004$ ). When BMI was  $\geq 28$  kg/m<sup>2</sup>, heavy smoking was significantly associated with DR(OR=2.219,  $p=0.049$ ),and there was a negative correlation between DR and the age of diagnosis of diabetes  $\geq 60$  years(OR=0.289,  $p=0.009$ ).

**Conclusions** Heavy smoking was an important related factor for DR in newly diagnosed diabetes mellitus patients when BMI was  $\geq 28$  kg/m<sup>2</sup>. Delaying the age of diabetes might prevent the occurrence of DR. To elucidate the correlation,long-term cohort studys with a large sample were needed.

**Keywords:** Smoking index, Type 2 diabetes mellitus, Diabetic retinopathy, Newly diagnosed diabetes mellitus.

#### **Strengths and limitations of this study**

This study is a representative population-based study.

There are few studies on the factors related to newly diagnosed diabetic retinopathy in type 2 diabetes mellitus patients in China.

In this study, we firstly used smoking index to assess smoking severity in the study of diabetic retinopathy.

The study is a single-centre cross-sectional study.

#### **Introduction:**

1  
2  
3  
4  
5  
6  
7  
8  
9  
10  
11  
12  
13  
14  
15  
16  
17  
18  
19  
20  
21  
22  
23  
24  
25  
26  
27  
28  
29  
30  
31  
32  
33  
34  
35  
36  
37  
38  
39  
40  
41  
42  
43  
44  
45  
46  
47  
48  
49  
50  
51  
52  
53  
54  
55  
56  
57  
58  
59  
60

Diabetes mellitus (DM) is a chronic metabolic disease characterized by hyperglycemia caused by various etiologies, and the incidence is increasing year by year worldwide. According to the report of the International Diabetes Federation (IDF) in 2017 about 425 million people are affected by DM, and that number is expected to reach 629 million by 2045.<sup>1</sup> China has the highest number of DM patients, and the prevalence has increased from 0.67% in 1980 to 10.4% in 2013.<sup>2</sup> A meta-analysis based epidemiological study conducted from 35 research centers around the world showed that the prevalence of diabetic retinopathy(DR) in the total diabetic population was 35.4%.<sup>3</sup> DR is a highly specific microvascular complication caused by diabetes, and its prevalence is significantly correlated with the course of DM and blood glucose levels.<sup>4</sup> DR is the most important cause of irreversible blindness in working-age adults.<sup>4</sup> Chronic hyperglycemia causes not only retinal vascular diseases, but also damage to retinal neurons, both of which factors lead to vision loss.<sup>5</sup> Twenty percent of newly diagnosed type 2 diabetic (T2DM) patients are diagnosed with DR.<sup>3</sup> The explanation of this phenomenon is that often the onset of T2DM is insidious, and patients may have a long history of untreated hyperglycemia before diagnosis.<sup>3</sup> Are there any other risk factors for DR in these newly diagnosed patients? There is no relevant research report at present.

Smoking is harmful and it's also an important risk factor for cardiovascular, cerebrovascular and, respiratory diseases and malignant tumors.<sup>6</sup> Smoking is one of the most serious public health issues across the world and it is responsible for about 7 million deaths per year worldwide.<sup>6</sup> In a 14-year prospective cohort study, Jee SH found that people smoking more than 20 cigarettes a day had a 1.55-fold higher incidence of diabetes than non-smokers.<sup>7</sup> It is well-known that smoking may cause an increase in proteinuria.<sup>8</sup> However, many studies show that smoking has no significant correlation with DR.<sup>9</sup> Even some studies in China have shown that smoking is a protective factor for DR.<sup>10</sup> Many diabetic patients had started smoking before they were diagnosed with diabetes. Does smoking contribute to the complications of DR in newly diagnosed patients? Little research has been done on the relationship between smoking and DR in newly diagnosed diabetic patients. The present study investigated the factors related to DR, and explored the correlation between smoking and DR in patients with newly diagnosed type 2 diabetes who visited the outpatient department of the hospital from December 2018 to April 2019.

### Research design and methods:

The present study was a single-center cross-sectional study of factors associated with diabetic retinopathy in newly diagnosed type 2 diabetic patients in Tianjin 4th Central Hospital. The hospital was a regional medical center in Tianjin. The hospital had a diabetes identification

1  
2  
3 center. The patients in the region should be identified by the department before they could  
4 enjoy more preferential health insurance policies in the clinic. The Metabolic Disease  
5 Management Center(MMC) was responsible for the screening for complications in newly  
6 diagnosed diabetes patients, such as urinary protein, fundus examination, peripheral vascular  
7 and neuropathy. The diabetes nursing team undertook the measurement of height, weight and  
8 blood pressure, and gathered information about smoking, drinking and past disease history.  
9 Electronic medical records were generated at the same time.  
10  
11  
12  
13

14  
15 **Participants:** Study participants were newly diagnosed type 2 diabetic patients who visited MMC  
16 from December 2018 to April 2019. The patients information came from an electronic database  
17 of the hospital's diabetes identification center. All the patients who underwent fundus  
18 examination were enrolled in this study. All patient identifiers were removed prior to analysis.  
19 This clinical study protocol was approved by the institutional review board of Tianjin 4th Central  
20 Hospital, and all steps were conducted in accordance with the principles the World Medical  
21 Association Declaration of Helsinki.<sup>11</sup> (Trial registration code: ChiCTR1900020728).Written  
22 informed consent was obtained from each patient.  
23  
24  
25  
26  
27  
28  
29

#### 30 **Inclusion criteria:**

31  
32 The study enrolled participants with a baseline of newly diagnosed with T2DM within past six  
33 months; patients who could communicate independently and describe their smoking status;  
34 none of the smokers had given up smoking before the study; all patients underwent diabetic  
35 retinopathy screening in the study.  
36  
37  
38

39 According to the Chinese guidelines for the prevention and treatment of diabetes, all  
40 patients with diabetes in our hospital need to be diagnosed by an oral glucose tolerance test. The  
41 diagnostic criteria during execution were as follows:(1)Fasting plasma glucose(FPG) $\geq$ 7.0mmol/l.  
42 Fasting was defined as no caloric intake for at least 8h; Or(2)2-h plasma glucose $\geq$ 11.1mmol/l  
43 during an oral glucose tolerance test(OGTT). The test should be performed as described by the  
44 World Health Organization, using a glucose load containing the equivalent of 75 g anhydrous  
45 glucose dissolved in the water. HbA1c test was not standardized in China, so it couldn't be used  
46 as a diagnostic standard.<sup>12</sup>  
47  
48  
49  
50  
51  
52  
53

#### 54 **Exclusion criteria:**

55  
56 Exclusion criteria : Type 1 diabetes and other specific types of diabetes; acute complications of  
57 diabetes, such as diabetic ketoacidosis or lactic acidosis; hypovolaemia; subjects with diabetic  
58  
59  
60



1  
2  
3 nephropathy complications, rheumatic diseases, autoimmune diseases, pregnancy, malignant  
4 tumors, infection, foot ulcer, severe mental illness, thyroid dysfunction, severe hepatic  
5 insufficiency or renal insufficiency, severe anemia, heart failure or respiratory insufficiency;  
6 cognitive impairment, and communication disorders.  
7  
8  
9

### 10 11 12 **Evaluation of Clinical variables:**

13  
14  
15 Information about patients' names, sex, phone numbers, BMI, age, smoking history, drinking  
16 history, family history of DM, hypertension and HbA1c was collected by using a uniform  
17 information table. The formula for BMI was weight in kilograms divided by square of height in  
18 meters. BMI ( $\geq 28 \text{ kg/m}^2$ ) met obesity criteria according to Chinese standards.<sup>13</sup> Venous blood  
19 samples were collected by EDTA tubes in fasting state in the morning. The level of HbA1c was  
20 determined by affinity chromatography in the hospital standard laboratory (**Tosoh Corporation,**  
21 **Japan**). Smoking status assessment: According to the WHO (1997) smoking survey method,  
22 smoking at least one cigarette per day for more than six months was considered as a smoking  
23 history.<sup>14</sup> The smoking index (SI) was calculated by multiplying the number of cigarettes smoked  
24 per day by the number of years the person has smoked. In our study, according to SI, 0 meant  
25 non-smoking,  $\leq 500$  meant light and moderate smoking, and  $> 500$  meant heavy smoking.  
26  
27  
28  
29  
30  
31

32 Screening for DR was carried out according to EURODIAB guidelines using one  $45^\circ$  field  
33 retinograph, centered on the fovea. If DR was suspected, another two  $45^\circ$  retinographs were  
34 taken.<sup>15</sup> Ophthalmologists judged whether the patient had DR or not according to the results of  
35 the funduscopic examination and guidelines. In the study, the results were reported as either  
36 positive or negative (diabetic retinopathy DR or non-diabetic retinopathy NDR), and the patients  
37 were divided into two groups (DR group and NDR group). Non-diabetic retinopathy here  
38 includes a normal fundus and other retinopathy that may be caused by other causes  
39 (non-diabetic) such as fundus arteriosclerosis.  
40  
41  
42  
43  
44  
45  
46  
47

### 48 **Statistical analysis:**

49 Descriptive analysis was used to illustrate the basic demographic characteristics. For continuous  
50 variables, one sample Kolmogorov-Smirnov Normality test was used to check normality of the  
51 distribution of such variables. Once normal distribution and homogeneity of variance were  
52 satisfied, values were represented by the  $\bar{x} \pm \text{SD}$  and student t-test was used. For categorical  
53 variables,  $\chi^2$  test was performed. The occurrence of DR was identified as the dependent variable,  
54 and the related factors (sex, hypertension, age at DM diagnosis, family history of diabetes,  
55  
56  
57  
58  
59  
60

1  
2  
3 drinking history, HbA1c, BMI and smoking status) were listed as independent variables. To  
4 analyse the factors associated with DR and adjust for potential confounding effects, we examined  
5 the factors associated with DR using multivariable logistic regression analysis. All the analyses  
6 were conducted using SPSS 16.0 software with a  $p < 0.05$  (two-sided) indicating statistical  
7 significance.  
8  
9  
10

### 11 12 13 **Patient and Public Involvement:**

14 Patients were not involved in setting the research questions or planning the study. Investigators  
15 did not know the identities of the study participants. In this study, the electronic data was gained  
16 from the health records at the institution. All patient identifiers were removed before the  
17 analysis was conducted. There was no direct patient and public involvement.  
18  
19  
20  
21  
22  
23  
24  
25  
26  
27

### 28 **Results:**

#### 29 **Characteristics of the study population**

30  
31  
32  
33  
34 In this survey, 952 patients entered the study initially and 5 were excluded because their fundus  
35 could not be seen clearly. Finally, a total of 947 patients were enrolled in the study. Their  
36 average age was  $53.2 \pm 11.6$  years. The average of HbA1c was  $9.53 \pm 2.13\%$ . BMI of the patients  
37 was  $27.5 \pm 4.3 \text{ kg/m}^2$ . 430 patients had a history of smoking. The average smoking age was  $27.8$   
38  $\pm 12.2$  years (2~60 years). They smoked  $21.8 \pm 12.3$  cigarettes per day. Baseline characteristics  
39 were shown in Table 1.  
40  
41  
42  
43  
44

#### 45 **Comparison of clinical data between DR and NDR groups**

46  
47 755 patients (79.7%) were in NDR group, and 192 patients were in DR group. Among patients in  
48 DR group, there were 12 patients with PDR. The comparison of clinical data between DR and NDR  
49 groups was shown in Table 2. There was no statistically significant difference between the two  
50 groups in sex, age, hypertension, family history of diabetes, drinking history and HbA1c. BMI was  
51 significantly higher in NDR patients ( $27.7 \pm 4.2$  vs  $26.7 \pm 4.4$ ,  $p = 0.004$ ). Smoking status was  
52 different between the two groups ( $\chi^2 = 6.350$ ,  $p = 0.042$ ).  
53  
54  
55

56 The occurrence of DR was identified as the dependent variable, and the related risk factors  
57  
58  
59  
60

were listed as independent variables. Both of the variables were progressed through multivariate logistic regression analysis in Table 3. Patients with BMI $\geq$ 28kg/m<sup>2</sup> were less likely to have DR in newly diagnosed diabetic patients (OR=0.587, p=0.004). The age classification of DM diagnosis and smoking status were also statistically significant in regression analysis.

#### Did obesity have protective effect on DR?

The study compared the age, HbA1c, smoking and drinking history, family history of DM and complications between the obese and non obese patients in Table 4(BMI $\geq$ 28kg/m<sup>2</sup> vs BMI<28kg/m<sup>2</sup>). There was no statistically significant difference between the two groups in sex, family history of DM, drinking history, smoking history and HbA1c. The age of obese diabetic patients was significantly lower than that of non obese patients(50.4 $\pm$ 12.4 vs 55.2 $\pm$ 10.5, t=-6.184, p<0.001). Because the onset of T2DM was insidious, patients might have a long history before diagnosis.<sup>3</sup> BMI could be a possible confounding variable.

After adjustment for BMI and age, DR related factors were further analyzed. Firstly, the participants were divided into two groups according to whether BMI was  $\geq$  28 kg/m<sup>2</sup>. The incidence of DR in patients with different smoking status was compared(Table 5).The incidence of DR in heavy smoking patients was significantly higher in obese patients. There was no significant difference in the incidence of DR with different smoking status among patients over 60 years old(Table 5). Then after adjustment for age, multiple logistic regression analysis was used to analysis the related factors of DR(Table 6). When BMI was  $\geq$ 28 kg/m<sup>2</sup>, heavy smoking was significantly associated with DR (OR=2.219, p=0.049),and there was a negative correlation between DR and the age of diagnosis of diabetes $\geq$ 60 years(OR=0.289, p=0.009).

**Table 1** Baseline characteristics of 947 participants with newly diagnosed T2DM.

| Items                     | n   | %    |
|---------------------------|-----|------|
| Sex                       |     |      |
| male                      | 566 | 59.8 |
| female                    | 381 | 40.2 |
| With family history of DM | 580 | 61.2 |
| Age                       |     |      |
| < 50 years old            | 309 | 32.5 |
| $\geq$ 50,< 60 years old  | 318 | 33.4 |

|                            |     |      |
|----------------------------|-----|------|
| ≥60 years old              | 325 | 34.1 |
| With hypertension          | 498 | 52.6 |
| With drinking history      | 195 | 20.6 |
| Smoking status             |     |      |
| Non-smoking                | 517 | 54.6 |
| Light and moderate smoking | 212 | 22.4 |
| Heavy smoking              | 218 | 23.0 |

Abbreviations: DM, Diabetes mellitus.

**Table 2** Comparison of clinical data between DR and NDR groups

| Items                     |                 | NDR<br>(n=755) | DR<br>(n=192) | t/ $\chi^2$        | P value |
|---------------------------|-----------------|----------------|---------------|--------------------|---------|
| Sex                       | Male            | 447(79.0%)     | 119(21.0%)    | 0.490 <sup>a</sup> | 0.510   |
|                           | Female          | 308(80.8%)     | 73(19.2%)     |                    |         |
| Age                       | years           | 53.3 ± 11.7    | 52.9 ± 11.1   | 0.350 <sup>b</sup> | 0.726   |
| Family history of DM      | no              | 288(78.5%)     | 79(21.5%)     | 0.580 <sup>a</sup> | 0.456   |
|                           | yes             | 467(80.5%)     | 113(19.5%)    |                    |         |
| Drinking history          | no              | 608(80.9%)     | 144(19.1%)    | 2.863 <sup>a</sup> | 0.109   |
|                           | yes             | 147(75.4%)     | 48(24.6%)     |                    |         |
| Hypertension <sup>c</sup> | no              | 349(81.2%)     | 81(18.8%)     | 1.457 <sup>a</sup> | 0.265   |
|                           | yes             | 392(78.7%)     | 106(21.3%)    |                    |         |
| Age of DM diagnosis       | < 50 years      | 247(79.9%)     | 62 (20.1%)    | 2.382 <sup>a</sup> | 0.304   |
|                           | ≥50, < 60 years | 243(77.1%)     | 72(22.9%)     |                    |         |

|                 |                            |            |           |                     |       |
|-----------------|----------------------------|------------|-----------|---------------------|-------|
|                 | ≥60 years                  | 265(82.0%) | 58(18.0%) |                     |       |
| HbA1c           | %                          | 9.51±2.13  | 9.60±2.12 | -0.546 <sup>b</sup> | 0.585 |
| BMI             | kg/m <sup>2</sup>          | 27.7±4.2   | 26.7±4.4  | 2.921 <sup>b</sup>  | 0.004 |
| Smoking history | no                         | 424(82.0%) | 93(18.0%) | 3.682 <sup>b</sup>  | 0.062 |
|                 | yes                        | 331(77.0%) | 99(23.0%) |                     |       |
| Smoking status  | Non-smoking                | 424(82.0%) | 93(18.0%) | 6.350 <sup>a</sup>  | 0.042 |
|                 | Light and moderate smoking | 170(80.2%) | 42(19.8%) |                     |       |
|                 | Heavy smoking              | 161(73.9%) | 57(26.1%) |                     |       |

Note: <sup>a</sup> chi-square test , <sup>b</sup> student t test and <sup>c</sup>19 cases of patients with missing data. DM, Diabetes mellitus. There was no statistically significant difference if p >0.05.

**Table 3** Logistic regression analysis of related factors for DR

| Factors              | B      | SE    | Wald $\chi^2$ | P value | OR    | 95%CI       |
|----------------------|--------|-------|---------------|---------|-------|-------------|
| Sex                  | 0.171  | 0.220 | 0.607         | 0.436   | 1.187 | 0.771-1.826 |
| Hypertension         | 0.257  | 0.174 | 2.180         | 0.140   | 1.293 | 0.919-1.818 |
| Drinking history     | 0.137  | 0.221 | 0.381         | 0.537   | 1.146 | 0.743-1.769 |
| HbA1c                | 0.007  | 0.038 | 0.037         | 0.847   | 1.007 | 0.936-1.085 |
| BMI                  | -0.532 | 0.183 | 8.497         | 0.004   | 0.587 | 0.410-0.840 |
| Family history of DM | -0.166 | 0.173 | 0.924         | 0.336   | 0.847 | 0.604-1.188 |
| Age of DM diagnosis  | -0.248 | 0.111 | 4.970         | 0.026   | 0.780 | 0.628-0.970 |
| Smoking status       | -0.280 | 0.125 | 5.017         | 0.025   | 0.756 | 0.591-0.966 |
| Constant             | -0.440 | 0.582 | 0.570         | 0.450   | 0.644 |             |

Note: assignment instructions as follows---Sex (male 1, female 2); BMI(<28 0, ≥28 1); HbA1c(≤9% 0, >9 1); Hypertension 、 drinking history and family history of DM no 0, yes 1; Age of DM

diagnosis: < 50 years 1, ≥50, < 60 years 2, ≥60 years 3; Smoking status non-smoking 0, light and moderate smoking 1, heavy smoking 2.

**Table 4** Comparison of clinical data between patients(BMI≥28kg/m<sup>2</sup> vs BMI<28kg/m<sup>2</sup>)

| Items                           |        | BMI≥28kg/m <sup>2</sup><br>(n=379) | BMI<28kg/m <sup>2</sup><br>(n=573) | t/χ <sup>2</sup>    | P value |
|---------------------------------|--------|------------------------------------|------------------------------------|---------------------|---------|
| Sex(n,%)                        | Male   | 230(60.7%)                         | 338(59.0%)                         | 0.273 <sup>a</sup>  | 0.637   |
|                                 | Female | 149(39.3.8%)                       | 235(41.0%)                         |                     |         |
| Age                             | years  | 50.4 ± 12.4                        | 55.2 ± 10.5                        | -6.184 <sup>b</sup> | <0.001  |
| Family history of DM<br>(n,%)   | no     | 141(37.2%)                         | 228(39.8%)                         | 0.643 <sup>a</sup>  | 0.455   |
|                                 | yes    | 238(62.8%)                         | 345(60.2%)                         |                     |         |
| Drinking history(n,%)           | no     | 305(80.5%)                         | 452(78.9%)                         | 0.567 <sup>a</sup>  | 0.305   |
|                                 | yes    | 74(19.5%)                          | 121(21.1%)                         |                     |         |
| Hypertension <sup>c</sup> (n,%) | no     | 148(40.1%)                         | 284(50.4%)                         | 9.419 <sup>a</sup>  | 0.002   |
|                                 | yes    | 221(59.9%)                         | 280(49.6%)                         |                     |         |
| HbA1c                           | %      | 9.38 ± 2.10                        | 9.63 ± 2.30                        | -1.744 <sup>b</sup> | 0.082   |
| Smoking history(n,%)            | no     | 217(57.3%)                         | 303(52.9%)                         | 1.763 <sup>b</sup>  | 0.206   |
|                                 | yes    | 162(42.7%)                         | 270(47.1%)                         |                     |         |

Note: <sup>a</sup> chi-square test , <sup>b</sup> student t test and <sup>c</sup>19 cases of patients with missing data. There was no statistically significant difference if p >0.05.

**Table 5** The incidence of DR in patients with different smoking status

| Items | Non-smoking<br>(n,%) | Light and moderate<br>smoking(n,%) | Heavy smoking<br>(n,%) | χ <sup>2</sup> | P value |
|-------|----------------------|------------------------------------|------------------------|----------------|---------|
|-------|----------------------|------------------------------------|------------------------|----------------|---------|

|                         |         |           |           |           |        |       |
|-------------------------|---------|-----------|-----------|-----------|--------|-------|
| BMI(kg/m <sup>2</sup> ) | ≥28     | 27(12.4%) | 11(12.1%) | 20(28.2%) | 11.163 | 0.004 |
|                         | <28     | 66(22.0%) | 31(25.6%) | 37(25.2%) | 0.901  | 0.637 |
| Age(years)              | <50     | 37(21.8%) | 15(13.8%) | 10(33.3%) | 6.300  | 0.043 |
|                         | ≥50,<60 | 23(14.6%) | 17(35.4%) | 32(29.4%) | 13.080 | 0.001 |
|                         | ≥60     | 33(17.5%) | 10(18.2%) | 15(19.0%) | 0.090  | 0.956 |

**Table 6** Logistic regression analysis of related factors for DR (BMI<28kg/m<sup>2</sup>, ≥28kg/m<sup>2</sup>)

| Factors                 |                      | B      | SE    | Wald<br>$\chi^2$ | P value | OR    | 95%CI       |
|-------------------------|----------------------|--------|-------|------------------|---------|-------|-------------|
| BMI<28kg/m <sup>2</sup> | Sex                  | 0.168  | 0.290 | 0.334            | 0.563   | 1.183 | 0.670-2.089 |
|                         | Hypertension         | 0.138  | 0.213 | 0.421            | 0.517   | 1.148 | 0.756-1.744 |
|                         | Drinking history     | -0.015 | 0.279 | 0.003            | 0.958   | 0.986 | 0.571-1.701 |
|                         | HbA1c                | 0.001  | 0.045 | 0.000            | 0.9983  | 1.001 | 0.917-1.093 |
|                         | Family history of DM | -0.406 | 0.208 | 3.815            | 0.051   | 0.666 | 0.443-1.001 |
|                         | Age(years)           |        |       | 1.535            | 0.464   |       |             |
|                         | <50                  | -      | -     | -                | -       | 1     | -           |
|                         | 50~60                | 0.071  | 0.279 | 0.065            | 0.799   | 1.074 | 0.621-1.856 |
|                         | ≥60                  | -0.221 | 0.281 | 0.621            | 0.431   | 0.801 | 0.462-1.390 |

|                                |                            |        |       |       |       |       |                 |
|--------------------------------|----------------------------|--------|-------|-------|-------|-------|-----------------|
|                                | Smoking status             |        |       | 1.595 | 0.450 |       |                 |
|                                | Non smoking                | -      | -     | -     | -     | 1     | -               |
|                                | Light and moderate smoking | 0.380  | 0.328 | 1.345 | 0.246 | 1.463 | 0.769-2.78<br>1 |
|                                | Heavy smoking              | 0.342  | 0.321 | 1.136 | 0.286 | 1.408 | 0.751-2.64<br>0 |
| BMI $\geq$ 28kg/m <sup>2</sup> | Sex                        | 0.040  | 0.392 | 0.010 | 0.919 | 1.040 | 0.483-2.24<br>2 |
|                                | Hypertension               | 0.400  | 0.318 | 1.578 | 0.209 | 1.492 | 0.799-2.78<br>4 |
|                                | Drinking history           | 0.593  | 0.384 | 2.378 | 0.123 | 1.809 | 0.852-3.84<br>2 |
|                                | HbA1c                      | 0.000  | 0.071 | 0.000 | 0.995 | 1.000 | 0.869-1.15<br>0 |
|                                | Family history of DM       | 0.398  | 0.340 | 1.374 | 0.241 | 1.489 | 0.765-2.89<br>8 |
|                                | Age(years)                 |        |       | 7.195 | 0.027 |       |                 |
|                                | <50                        | -      | -     | -     | -     | 1     | -               |
|                                | 50~60                      | -0.149 | 0.358 | 0.173 | 0.678 | 0.862 | 0.427-1.73<br>9 |
|                                | $\geq$ 60                  | -1.241 | 0.474 | 6.838 | 0.009 | 0.289 | 0.114-0.73<br>3 |
|                                | Smoking status             |        |       | 6.920 | 0.031 |       |                 |
|                                | Non smoking                | -      | -     | -     | -     | 1     | -               |
|                                | Light and moderate smoking | -0.330 | 0.435 | 0.573 | 0.449 | 0.719 | 0.306-1.68<br>8 |
|                                | Heavy smoking              | 0.797  | 0.404 | 3.884 | 0.049 | 2.219 | 1.004-4.90      |



## Discussion:

### Summary of results

In the study, among the newly diagnosed T2DM patients 20.3% presented with DR. After analyzing the related factors of DR, our study found that obese patients may have a lower incidence of DR (OR=0.587, p=0.004). Many researchers have shown that duration of DM, blood glucose, blood pressure and blood lipids are important risk factors for DR.<sup>16-18</sup> The duration is the most important factor.<sup>19</sup> The subjects of present study were all newly diagnosed type 2 diabetic patients. we found that DR was related to body mass index, smoking status and age of DM diagnosis . To the best of our knowledge, the present study is the first one that is designed to investigate the correlation between smoking level and DR in newly diagnosed patients with T2DM. The results of the study suggested that heavy smoking was associated with DR in obese (BMI  $\geq$  28kg/m<sup>2</sup>) newly diagnosed T2DM patients (OR=2.219, p=0.049), and there was a negative correlation between DR and the age of diagnosis of diabetes  $\geq$  60 years (OR=0.289, p=0.009). Those correlations didn't exist in non-obese (BMI < 28kg/m<sup>2</sup>) patients.

### The relationship between BMI and DR

In the study, we found that DR was negatively correlated with BMI. This was not consistent with other research results. Gray et al. followed up 14,657 diabetic patients for an average of 6.68 years and found that increased risk of DR was associated with higher BMI.<sup>20</sup> It had also been reported that BMI was not correlated or even negatively correlated with DR.<sup>21</sup> The subjects in our study had newly diagnosed type 2 diabetes mellitus. The average age of newly T2DM patients with obesity (BMI  $\geq$  28kg/m<sup>2</sup>) was  $50.4 \pm 12.4$  years, while that of patients without obesity was  $55.2 \pm 10.5$  years. The former was significantly lower than the latter (t=-6.184, p<0.001). As the onset of T2DM is insidious, patients may have had a long history before diagnosis.<sup>3</sup> Based on the usual clinical experience and their different diagnostic ages, our study suggested that the diagnostic age of T2DM patients with obesity might be closer to the real age of onset. Perhaps because non-obese patients might be confused with more complex diabetic course factor, we did not find any factors in the analysis of the related factors of DR in these patients. In conclusion, we don't think that high BMI is a protective related factor for DR. It is very likely that there are confounding factors, such as an unobserved course of T2DM.

### The relationship between smoking and DR

1  
2  
3 Cigarette smoking is a well-known risk factor for many chronic diseases, including cardiovascular  
4 diseases and various malignancies.<sup>6</sup> Many researchers have reported the negative effects of  
5 smoking on DM.<sup>22-23</sup> A 14-year prospective cohort study in South Korea showed that the risk of  
6 DM among men and women who smoked 20 or more cigarettes a day was 1.55 times higher  
7 than that in non-smokers.<sup>7</sup> Cigarette smoking is independently associated with the incidence of  
8 T2DM.<sup>24</sup> Although the mechanisms involved are not clear yet. Smoking is associated with insulin  
9 resistance, inflammation and dyslipidemia.<sup>25-26</sup> When BMI was  $\geq 28$  kg/m<sup>2</sup>, we found that the  
10 incidence of DR was 12.4% in non-smokers, 12.1% in light and moderate smokers, and 28.2% in  
11 heavy smokers ( $\chi^2=11.163, p=0.004$ ). Some studies have reported that no association was found  
12 between smoking and DR in patients with T2DM.<sup>27-28</sup> Smoking cessation is one of the important  
13 targets for diabetes control and the prevention of chronic diabetes complications.<sup>30</sup>

20  
21 Studies have shown that cigarette smoking impairs nitric oxide-mediated endothelial  
22 function via increased generation of superoxide anions, which may increase the risk of diabetic  
23 retinopathy in diabetic patients and could cause eye tissue ischemia, eye tissue hypoxia, retinal  
24 arteriosclerosis and decrease of choroidal blood flow, eventually leading to retinal ischemia.<sup>30-31</sup>  
25 When BMI was  $\geq 28$  kg/m<sup>2</sup>, present study shows that the incidence of DR was 28.2% in heavy  
26 smokers. Heavy smoking was significantly associated with DR. Smoking may aggravate  
27 retinopathy damage by increasing arteriosclerosis.<sup>32</sup> Diabetic retinopathy remains the leading  
28 cause of acquired blindness in working-age adults.<sup>4</sup> While the cutting-edge research in the field  
29 has identified many molecular, functional, and structural abnormalities, the exact molecular  
30 mechanism of this devastating disease remains obscure.<sup>33</sup> A diabetic environment drives the  
31 dysfunction of the power generator of the cell and disturbs the homeostasis of the mitochondrial  
32 dynamic. Mitochondria appear to have a significant role in the development of diabetic  
33 retinopathy, and unraveling the mechanism responsible for their damage as well as the role of  
34 epigenetic modifications in mitochondrial homeostasis should identify novel therapeutic  
35 targets.<sup>33</sup> Further research is needed to determine whether smoking affects mitochondrial DNA  
36 function.

45 In the present study, DR was found in 20.3% of newly diagnosed type 2 diabetic patients.  
46 This was consistent with other findings.<sup>3</sup> The study suggests that smoking may be an important  
47 related factor for the occurrence of DR in newly diagnosed diabetic patients. Tyrberg M et al.  
48 investigated 794 patients diagnosed with diabetes in 1987-1988 and found that smoking history  
49 could increase the risk of diabetic retinopathy during the 9 to 17 years after diagnosis.<sup>34</sup> Because  
50 smoking behavior occurs before the diagnosis of T2DM in this study, heavy smoking is very likely  
51 to be a risk factor for DR. When BMI was  $\geq 28$  kg/m<sup>2</sup>, there was a negative correlation between  
52 DR and the age of diagnosis of diabetes  $\geq 60$  years (OR=0.289, p=0.009). Wong et al. investigated  
53 more than 1400 patients with type 2 diabetes, and found that the risk of DR in young patients

1  
2  
3 was significantly higher than that in old patients.<sup>35</sup> After adjusting for factors such as the course  
4 of diabetes, the risk of DR was increased twice in those with type 2 diabetes who were less than  
5 45 years old.<sup>35</sup> Delaying the age of diabetes might prevent the occurrence of DR.  
6  
7  
8  
9

### 10 **Limitations of the study**

11  
12  
13 The study is a single-center cross-sectional study. The results only show the correlation between  
14 smoking and diabetic retinopathy. Prospective cohort studies are needed to confirm whether  
15 there is a causal relationship between smoking and DR in newly diagnosed T2DM patients.  
16 Because of the large number of newly diagnosed type 2 diabetes patients, we have set relatively  
17 wide exclusion criteria for the population, which may affect external validity. Although our  
18 department is responsible for the first diagnosis and identification of diabetes in Tianjin, it is still  
19 unable to achieve a timely diagnosis for all those patients who newly develop diabetes. Because  
20 the patients are all from Tianjin, China, the conclusion has got regional limitations.  
21  
22  
23  
24  
25  
26  
27  
28

### 29 **Conclusion**

30  
31 The study found that heavy smoking and the age of T2DM diagnosis were related factors for the  
32 occurrence of DR in newly diagnosed patients when BMI was  $\geq 28$  kg/m<sup>2</sup>. Although the subjects  
33 were with all newly diagnosed patients, it was known that the onset of type 2 diabetes mellitus  
34 had been relatively insidious. It is of great importance for people in populations at high-risk of  
35 diabetes mellitus to quit smoking. Delaying the age of diabetes may prevent the occurrence of  
36 DR. Therefore, long-term cohort studies were needed to elucidate the correlation.  
37  
38  
39

### 40 **Acknowledgements**

41  
42 This work was supported by National Key R&D Program of China(2018YFC1314000) and Tianjin  
43 Science and Technology Development Strategy Research Projects(18ZLXZF00740).  
44  
45

46 **Competing interests:** None declared.  
47

48 **Patient consent:** Obtained.  
49

50  
51 **Ethics approval:** This study was approved by the IRB of Tianjin 4th Central  
52 Hospital(2017-SZXL017) and the Chinese Clinical Trial Registry (No. ChiCTR1900020728).  
53  
54

55 **Provenance and peer review:** Not commissioned; externally peer reviewed.  
56

57 **Contributors:** Zhaohu Hao wrote the manuscript. Xiao Huang was in charge of fundus  
58  
59  
60

1  
2  
3 examination. Yongzhang Qin was responsible for basic information collection. Hailin Shao was  
4 responsible for the statistical analysis of the data. Huanming Li was responsible for auditing the  
5 fundus images and reports. Rong Xu was responsible for keeping patients in order. Baocheng  
6 Chang proposed the necessity and design of the study. Fengshi Tian was the director of our  
7 department and also provided project support for the research.  
8  
9

10  
11  
12 **Data sharing statement:** Data is available upon reasonable request.  
13

14 **References:**

- 15  
16 1.American Diabetes Association.(2017). Classification and diagnosis of diabetes. *Diabetes Care*, 40(suppl  
17 1):S11-S24.  
18  
19 2.Wang L , Gao P , Zhang M , et al. Prevalence and Ethnic Pattern of Diabetes and Prediabetes in China in 2013.  
20 *JAMA* 2017;317(24):2515-2523.  
21  
22 3.Yau J W Y , Rogers S , Kawasaki R . Global prevalence and major risk factors of diabetic retinopathy. *Diabetes*  
23 *Care* 2012; 35(3):556-564.  
24  
25 4.Pang C, Jia L, Jiang S, et al.Determination of diabetic retinopathy prevalence and associated risk factors in  
26 Chinese diabetic and pre-diabetic subjects: Shanghai diabetic complications study. *Diabetes Metab Res Rev*  
27 2012;28(3):276-283.  
28  
29 5.Mellitus, E.C.O.O. D. . (2002). American diabetes association: clinical practice recommendations 2002. *Diabetes*  
30 *Care*, 25 Suppl 1, S1-147.  
31  
32 6.GBD 2015 Risk Factors Collaborators.(2016).Global, regional, and national comparative risk assessment of 79  
33 behavioural, environmental and occupational, and metabolic risks or clusters of risks,1990-2015: a systematic  
34 analysis for the Global Burden of Disease Study 2015. *Lancet*,388(10053):1659-1724.  
35  
36 7.Jee S H , Foong A W , Hur N W , et al. Smoking and Risk for Diabetes Incidence and Mortality in Korean Men  
37 and Women. *Diabetes Care* 2010; 33(12):2567-2572.  
38  
39 8.Ohkuma T , Nakamura U , Iwase M , et al. Effects of smoking and its cessation on creatinine- and cystatin  
40 C-based estimated glomerular filtration rates and albuminuria in male patients with type 2 diabetes mellitus: the  
41 Fukuoka Diabetes Registry[J]. *Hypertension Research*, 2016;39(10):744-751.  
42  
43 9.Mose SE,Klein R,Klein BE. Cigarette smoking and ten-year progression of diabetic  
44 retinopathy[J].*Ophthalmology*,1996,103(3):1438-1442.  
45  
46 10.Li Y, Wang J, Qu B, etal.Prevalence and risk factors of diabetic retinopathy in hospital  
47 patients[J].*Natl Med J China*,2018,98(6):440-444(in Chinese).  
48  
49  
50  
51  
52  
53  
54  
55  
56  
57  
58  
59  
60

11. General Assembly of the World Medical Association. (2014). World Medical Association Declaration of Helsinki: ethical principles for medical research involving human subjects. *The Journal of the American College of Dentists*, 81:14-18.
12. Xu Y, Wang L, He J, et al. Prevalence and Control of Diabetes in Chinese Adults. *JAMA* 2013; 310(9):948-959.
13. Chen CM, Kong LZ. The guideline for prevention and control of overweight and obesity in Chinese adults[M]. Beijing: People's Medical Publishing House, 2006 (in Chinese).
14. World Health Organisation. Guidelines for controlling and monitoring the tobacco epidemic. Geneva: Tobacco or Health Programme, WHO, 1997.
15. Romero P, Sagarra R, Ferrer J, et al. The incorporation of family physicians in the assessment of diabetic retinopathy by non-mydratic fundus camera. *Diabetes Res Clin Pract* 2010; 88(2), 0-188.
16. Van Leiden H A, Dekker J M, Moll A C, et al. Blood Pressure, Lipids, and Obesity Are Associated With Retinopathy: The Hoorn Study. *Diabetes Care* 2002; 25(8):1320-1325.
17. Kumari N, Bhargava M, Nguyen DQ, et al. Six-year incidence and progression of diabetic retinopathy in Indian adults: the Singapore Indian Eye study. *Br J Ophthalmol* 2019; 0:1-8.
18. Kawasaki R, Kitano S, Sato Y, et al. Factors associated with non-proliferative diabetic retinopathy in patients with type 1 and type 2 diabetes: the Japan Diabetes Complication and its Prevention prospective study (JDCC study 4). *Diabetology International* 2019; 10:3-11.
19. Cohen O, Norymberg K, Neumann E, et al. Complication-Free Duration and the Risk of Development of Retinopathy in Elderly Diabetic Patients[J]. *Archives of Internal Medicine*, 1998, 158(6):641-644.
20. Gray N, Picone G, Sloan F, et al. Relation between BMI and Diabetes Mellitus and Its Complications among US Older Adults. *Southern Medical Journal*, 2015, 108(1):29-36.
21. Rooney D, Lye W K, Tan G, et al. Body mass index and retinopathy in Asian populations with diabetes mellitus. *Acta Diabetologica*, 2015, 52(1):73-80.
22. Kim S, Jee S, Nam J, et al. Do early onset and pack-years of smoking increase risk of type II diabetes?. *BMC Public Health* 2014; 14(1):178.
23. Pan A, Wang Y, Talaei M, et al. Relation of active, passive, and quitting smoking with incident type 2 diabetes: a systematic review and meta-analysis. *The Lancet Diabetes & Endocrinology* 2015; 3(12):958-967.
24. Sung Y T, Hsiao C T, Chang I J, et al. Smoking Cessation Carries a Short-Term Rising Risk for Newly Diagnosed Diabetes Mellitus Independently of Weight Gain: A 6-Year Retrospective Cohort Study. *Journal of Diabetes Research* 2016; 2016:1-7.

- 1  
2  
3 25.Ah C S. Smoking and Type 2 Diabetes Mellitus. *Diabetes & Metabolism Journal* 2012; 36(6):399-403.  
4  
5  
6 26.Hilawe E H , Yatsuya H , Li Y , et al. Smoking and Diabetes: Is the Association Mediated by Adiponectin, Leptin,  
7 or C-reactive Protein?. *Journal of Epidemiology* 2015;25(2):99-109.  
8  
9  
10 27.Moss S E , Klein R , Klein B E K . Cigarette Smoking and Ten-year Progression of Diabetic Retinopathy.  
11 *Ophthalmology* 1996;103(9):1438-1442.  
12  
13 28.Stratton I M , Kohner E M , Aldington S J , et al. UKPDS 50: Risk factors for incidence and progression of  
14 retinopathy in Type II diabetes over 6 years from diagnosis. *Diabetologia* 2001; 44(2):156-163.  
15  
16  
17 29.Tsuneaki O , Taiji N , Akitoshi Y . Effects of Habitual Cigarette Smoking on Retinal Circulation in Patients With  
18 Type 2 Diabetes. *Investigative Ophthalmology & Visual Science* 2016; 57(3):1345-1351.  
19  
20  
21 30.Aggarwal S, Khandelwal D, Dutta D, et al. (2019) Diabetes and Smoking: The Burden of Evidence. In:  
22 Rodriguez-Saldana J. (eds) *The Diabetes Textbook*. Springer, Cham.  
23  
24  
25 31.Jaimes E A , Demaster E G , Tian R X , et al. Stable Compounds of Cigarette Smoke Induce Endothelial  
26 Superoxide Anion Production via NADPH Oxidase Activation. *Arterioscler Thromb Vasc Biol* 2004;  
27 24(6):1031-1036.  
28  
29  
30 32.Zhang X, Lim SC, Tavintharan S, et al. Association of central arterial stiffness with the presence and severity of  
31 diabetic retinopathy in Asians with type 2 diabetes. *Diab Vasc Dis Res* 2019;3:1-8.  
32  
33  
34 33.Kowluru R A . Mitochondrial Stability in Diabetic Retinopathy: Lessons Learned From Epigenetics. *Diabetes*  
35 2019; 68(2):241-247.  
36  
37  
38 34.Tyrberg M , Nyström L, Arnqvist H J , et al. Overweight, hyperglycemia and tobacco use are modifiable risk  
39 factors for onset of retinopathy 9 and 17, years after the diagnosis of diabetes- A retrospective observational  
40 nation-wide cohort study. *Diabetes Research and Clinical Practice* 2017;133:21-29.  
41  
42  
43 35.Wong J , Molyneaux L , Constantino M , et al. Timing Is Everything: Age of Onset Influences Long-Term  
44 Retinopathy Risk in Type 2 Diabetes, Independent of Traditional Risk Factors[J]. *Diabetes Care*, 2008,  
45 31(10):1985-1990.  
46  
47  
48  
49  
50  
51  
52  
53  
54  
55  
56  
57  
58  
59  
60

# BMJ Open

## Analysis of factors related to diabetic retinopathy in newly diagnosed type 2 diabetic patients: a cross-sectional study.

|                                 |                                                                                                                                                                                                                                                                                                                                                                                                                                                                                                                                                                                                                                                                                                                                                                                                                  |
|---------------------------------|------------------------------------------------------------------------------------------------------------------------------------------------------------------------------------------------------------------------------------------------------------------------------------------------------------------------------------------------------------------------------------------------------------------------------------------------------------------------------------------------------------------------------------------------------------------------------------------------------------------------------------------------------------------------------------------------------------------------------------------------------------------------------------------------------------------|
| Journal:                        | <i>BMJ Open</i>                                                                                                                                                                                                                                                                                                                                                                                                                                                                                                                                                                                                                                                                                                                                                                                                  |
| Manuscript ID                   | bmjopen-2019-032095.R3                                                                                                                                                                                                                                                                                                                                                                                                                                                                                                                                                                                                                                                                                                                                                                                           |
| Article Type:                   | Original research                                                                                                                                                                                                                                                                                                                                                                                                                                                                                                                                                                                                                                                                                                                                                                                                |
| Date Submitted by the Author:   | 12-Dec-2019                                                                                                                                                                                                                                                                                                                                                                                                                                                                                                                                                                                                                                                                                                                                                                                                      |
| Complete List of Authors:       | Hao, Zhaohu; Tianjin Medical University, Tianjin Metabolic Diseases Hospital; Tianjin 4th Central Hospital, Metabolic Disease Management Center,<br>Huang, Xiao; Tianjin Medical University, Tianjin Metabolic Diseases Hospital<br>Qin, Yongzhang; Tianjin Medical University, Tianjin Metabolic Diseases Hospital; The First Affiliated Hospital of Gannan Medical University<br>Li, Huanming; Tianjin 4th Central Hospital, Metabolic Disease Management Center,<br>Tian, Fengshi; Tianjin 4th Central Hospital, Metabolic Disease Management Center,<br>Xu, Rong; Tianjin 4th Central Hospital, Metabolic Disease Management Center,<br>Chang, Baocheng; Tianjin Medical University, Tianjin Metabolic Diseases Hospital<br>Shao, Hailin; Tianjin 4th Central Hospital, Metabolic Disease Management Center, |
| <b>Primary Subject Heading</b>: | Diabetes and endocrinology                                                                                                                                                                                                                                                                                                                                                                                                                                                                                                                                                                                                                                                                                                                                                                                       |
| Secondary Subject Heading:      | Public health, Smoking and tobacco                                                                                                                                                                                                                                                                                                                                                                                                                                                                                                                                                                                                                                                                                                                                                                               |
| Keywords:                       | Smoking index, Diabetic retinopathy < DIABETES & ENDOCRINOLOGY, Type 2 diabetes mellitus, newly diagnosed diabetes mellitus                                                                                                                                                                                                                                                                                                                                                                                                                                                                                                                                                                                                                                                                                      |
|                                 |                                                                                                                                                                                                                                                                                                                                                                                                                                                                                                                                                                                                                                                                                                                                                                                                                  |

SCHOLARONE™  
Manuscripts



I, the Submitting Author has the right to grant and does grant on behalf of all authors of the Work (as defined in the below author licence), an exclusive licence and/or a non-exclusive licence for contributions from authors who are: i) UK Crown employees; ii) where BMJ has agreed a CC-BY licence shall apply, and/or iii) in accordance with the terms applicable for US Federal Government officers or employees acting as part of their official duties; on a worldwide, perpetual, irrevocable, royalty-free basis to BMJ Publishing Group Ltd ("BMJ") its licensees and where the relevant Journal is co-owned by BMJ to the co-owners of the Journal, to publish the Work in this journal and any other BMJ products and to exploit all rights, as set out in our [licence](#).

The Submitting Author accepts and understands that any supply made under these terms is made by BMJ to the Submitting Author unless you are acting as an employee on behalf of your employer or a postgraduate student of an affiliated institution which is paying any applicable article publishing charge ("APC") for Open Access articles. Where the Submitting Author wishes to make the Work available on an Open Access basis (and intends to pay the relevant APC), the terms of reuse of such Open Access shall be governed by a Creative Commons licence – details of these licences and which [Creative Commons](#) licence will apply to this Work are set out in our licence referred to above.

Other than as permitted in any relevant BMJ Author's Self Archiving Policies, I confirm this Work has not been accepted for publication elsewhere, is not being considered for publication elsewhere and does not duplicate material already published. I confirm all authors consent to publication of this Work and authorise the granting of this licence.



---

**Analysis of factors related to diabetic retinopathy in newly diagnosed type 2 diabetic patients:**

**a cross-sectional study**

Zhaohu Hao<sup>1,2\*</sup> MD, Xiao Huang<sup>1\*</sup> RN, Yongzhang Qin<sup>1,3,,</sup>Huanming Li<sup>2</sup> MD, Fengshi Tian<sup>2</sup>MD, Rong Xu<sup>2</sup> MD,Baocheng Chang<sup>1</sup> § MD, Hailin Shao<sup>2</sup> § MD.

**Author Affiliations:**

1 NHC Key Laboratory of Hormones and Development (Tianjin Medical University), Tianjin Key Laboratory of Metabolic Diseases, Tianjin Medical University Chu Hsien-I Memorial Hospital & Tianjin Institute of Endocrinology, Tianjin 300134, China

2 Department of Metabolic Disease Management Center, Tianjin 4th Central Hospital, The 4th Central Hospital Affiliated to Nankai University, The 4th Center Clinical College of Tianjin Medical University, 300140 Tianjin, China

3 Department of Endocrinology, The First Affiliated Hospital of Gannan Medical University, 341000 Ganzhou, China

\*These authors contributed equally and are co-first authors of this article.

§ Corresponding authors: Prof Baocheng Chang, NHC Key Laboratory of Hormones and Development (Tianjin Medical University) , Tianjin Key Laboratory of Metabolic Diseases, Tianjin Medical University Chu Hsien-I Memorial Hospital & Tianjin Institute of Endocrinology, Tianjin 300134,China; Prof Hailin Shao, Department of Metabolic Disease Management Center, Tianjin 4th Central Hospital, The 4th Central Hospital Affiliated to Nankai University, The 4th Center Clinical College of Tianjin Medical University, No.1 Zhongshan Road, Tianjin 300140, China

Tel: +86- 02226249403; +86- 02226249281

E-mail: Changbaocheng2019@163.com

**Abstract**

**Aim:** To investigate the related factors of diabetic retinopathy (DR) and explore the correlation between smoking and DR in patients with newly diagnosed type 2 diabetes.

**Design:** A single-center cross-sectional study

**Setting:** Tianjin 4th Central Hospital

**Participants:** Patients with newly diagnosed type 2 diabetes who visited the outpatient department of the hospital from December 2018 to April 2019

**Methods:** A total of 947 patients were enrolled in the study. They were divided into two groups according to whether they were diagnosed with DR (diabetic retinopathy group, DR group; non-diabetic retinopathy group, NDR group). The smoking index (SI) was calculated to assess smoking status. Factors such as sex, age, hypertension, T2DM diagnosed age, family history of diabetes, drinking history, HbA1c, body mass index (BMI) and smoking status were compared between the two groups. Logistic regression was used to analyze the relationship between DR and the above factors.

**Results** There was no statistically significant difference between the two groups in sex, age, hypertension, DM diagnosed age, family history of diabetes, drinking history and HbA1c. BMI was significantly higher in DR patients ( $27.7 \pm 4.2$  vs  $26.7 \pm 4.4$ ,  $p=0.004$ ). Smoking status was also different between the two groups ( $\chi^2=6.350$ ,  $p=0.042$ ). BMI was shown to be a related factor for DR in newly diagnosed diabetic patients (OR=0.592,  $p=0.004$ ). When BMI was  $\geq 28$  kg/m<sup>2</sup>, heavy smoking was significantly associated with DR (OR=2.219,  $p=0.049$ ), and there was a negative correlation between DR and the age of diagnosis of diabetes  $\geq 60$  years (OR=0.289,  $p=0.009$ ).

**Conclusions** Heavy smoking was an important related factor for DR in newly diagnosed diabetes mellitus patients when BMI was  $\geq 28$  kg/m<sup>2</sup>. Delaying the age of diabetes might prevent the occurrence of DR. To elucidate the correlation, long-term cohort studies with large samples are needed.

**Keywords:** Smoking index, Type 2 diabetes mellitus, Diabetic retinopathy, Newly diagnosed

---

diabetes mellitus.

### **Strengths and limitations of this study**

This study is a representative population-based study.

There are few studies on the factors related to newly diagnosed diabetic retinopathy in type 2 diabetes mellitus patients in China.

This study was the first to use the smoking index to assess smoking severity to study diabetic retinopathy.

The study is a single-center cross-sectional study.

### **Introduction**

Diabetes mellitus (DM) is a chronic metabolic disease characterized by hyperglycemia. It has various etiologies, and the incidence is increasing yearly worldwide. According to the report of the International Diabetes Federation (IDF) in 2017, about 425 million people were affected by DM, and that number is expected to reach 629 million by 2045.<sup>1</sup> China has the highest number of DM patients, and the prevalence has increased from 0.67% in 1980 to 10.4% in 2013.<sup>2</sup> A epidemiological-based meta-analysis conducted in 35 research centers around the world showed that the prevalence of DR in the total diabetic population was 35.4%.<sup>3</sup> DR is a highly specific microvascular complication caused by diabetes, and its prevalence is significantly correlated with the course of DM and blood glucose levels.<sup>4</sup> DR is the most important cause of irreversible

1  
2  
3  
4 blindness in working-age adults.<sup>4</sup> Chronic hyperglycemia causes not only retinal vascular diseases  
5  
6 but also damage to retinal neurons, both of which are factors that lead to vision loss.<sup>5</sup> Twenty  
7  
8 percent of newly diagnosed type 2 diabetic (T2DM) patients are diagnosed with DR.<sup>3</sup> The  
9  
10 explanation for this phenomenon is that the onset of T2DM is often insidious, and patients may  
11  
12 have a long history of untreated hyperglycemia before diagnosis.<sup>3</sup> Are there any other risk factors  
13  
14 for DR in these newly diagnosed patients? There is no relevant research report at present.  
15  
16  
17  
18  
19

20 Smoking is harmful to health, and it is an important risk factor for cardiovascular,  
21  
22 cerebrovascular and respiratory diseases and also for malignant tumors.<sup>6</sup> Smoking is one of the  
23  
24 most serious public health issues throughout the world, and it is responsible for about 7 million  
25  
26 deaths per year worldwide. <sup>6</sup> In a 14-year prospective cohort study, Jee SH found that people  
27  
28 smoking more than 20 cigarettes a day had a 1.55-fold higher incidence of diabetes than non-  
29  
30 smokers.<sup>7</sup> It is well-known that smoking may cause an increase in proteinuria.<sup>8</sup> However, many  
31  
32 studies have shown that smoking has no significant correlation with DR.<sup>9</sup> Even some studies in  
33  
34 China have shown that smoking is a protective factor for DR.<sup>10</sup> Many diabetic patients had started  
35  
36 smoking before they were diagnosed with diabetes. Does smoking contribute to the complications  
37  
38 of DR in newly diagnosed patients? Little research has been done on the relationship between  
39  
40 smoking and DR in newly diagnosed diabetic patients. The present study investigated the factors  
41  
42 related to DR and explored the correlation between smoking and DR in patients with newly  
43  
44 diagnosed T2DM who visited the outpatient department of the hospital from December 2018 to  
45  
46 April 2019.  
47  
48  
49  
50  
51  
52  
53  
54  
55  
56  
57  
58  
59  
60

---

## Research design and methods

The present study was a single-center cross-sectional study of factors associated with DR in newly diagnosed T2DM patients in Tianjin 4th Central Hospital. The hospital is a regional medical center in Tianjin. The hospital had a diabetes identification center. The patients in the region are identified by the department before they can enjoy more preferential health insurance policies in the clinic. The Metabolic Disease Management Center (MMC) was responsible for the screening for complications in newly diagnosed diabetes patients, such as urinary protein, fundus examination, peripheral vascular and neuropathy. The diabetes nursing team undertook the measurement of height, weight and blood pressure, and gathered information about smoking, drinking and past disease history. Electronic medical records were generated at the same time.

**Participants:** Study participants were newly diagnosed type 2 diabetic patients who visited MMC from December 2018 to April 2019. The patient information came from an electronic database of the hospital's diabetes identification center. All the patients who underwent fundus examination were enrolled in this study. All patient identifiers were removed prior to analysis. This clinical study protocol was approved by the institutional review board of Tianjin 4th Central Hospital, and all steps were conducted in accordance with the principles of the World Medical Association Declaration of Helsinki<sup>11</sup> (Trial registration code: ChiCTR1900020728). Written informed consent was obtained from each patient.

## Inclusion criteria

1  
2  
3  
4 The study enrolled participants with a baseline of being newly diagnosed with T2DM within the  
5  
6 past six months; patients who could communicate independently and describe their smoking  
7  
8 status; none of the smokers had given up smoking before the study; and all patients underwent  
9  
10 DR screening in the study.  
11  
12

13  
14  
15 According to the Chinese guidelines for the prevention and treatment of diabetes, all  
16  
17 patients with diabetes in our hospital are required to be diagnosed with an oral glucose  
18  
19 tolerance test. The diagnostic criteria during execution were as follows: (1) Fasting plasma  
20  
21 glucose (FPG)  $\geq 7.0$  mmol/l. Fasting was defined as no caloric intake for at least 8 h; or (2) 2-h  
22  
23 plasma glucose  $\geq 11.1$  mmol/l during an oral glucose tolerance test (OGTT). The test was  
24  
25 performed as described by the World Health Organization (WHO), using a glucose load  
26  
27 containing the equivalent of 75 g anhydrous glucose dissolved in water. A HbA1c test was not  
28  
29 standardized in China, so it could not be used as a diagnostic standard.<sup>12</sup>  
30  
31  
32  
33  
34  
35  
36  
37  
38  
39

#### 40 **Exclusion criteria**

41  
42 Type 1 diabetes and other specific types of diabetes; acute complications of diabetes, such as  
43  
44 diabetic ketoacidosis or lactic acidosis; hypovolemia; subjects with diabetic nephropathy  
45  
46 complications, rheumatic diseases, autoimmune diseases, pregnancy, malignant tumors,  
47  
48 infection, foot ulcer, severe mental illness, thyroid dysfunction, severe hepatic insufficiency or  
49  
50 renal insufficiency, severe anemia, heart failure or respiratory insufficiency; cognitive impairment  
51  
52 and communication disorders.  
53  
54  
55  
56  
57  
58  
59  
60

---

### Evaluation of clinical variables

Information about the patients' names, sex, phone numbers, BMI, age, smoking history, drinking history, family history of DM, hypertension and HbA1c was collected using a uniform information table. The formula for BMI was weight in kilograms divided by the square of height in meters. BMI ( $\geq 28$  kg/m<sup>2</sup>) met obesity criteria according to Chinese standards.<sup>13</sup> Venous blood samples were collected in EDTA tubes from fasting patients in the morning. The level of HbA1c was determined by affinity chromatography in the hospital standard laboratory (**Tosoh Corporation, Japan**). Smoking status assessment: According to the WHO (1997) smoking survey method, smoking at least one cigarette per day for more than six months was considered as a smoking history.<sup>14</sup> The smoking index (SI) was calculated by multiplying the number of cigarettes smoked per day by the number of years the person had smoked. In our study, according to the SI, 0 meant non-smoking,  $\leq 500$  meant light and moderate smoking, and  $> 500$  meant heavy smoking.

Screening for DR was carried out according to EURODIAB guidelines using one 45° field retinograph centered on the fovea. If DR was suspected, other two 45° retinographs were obtained.<sup>15</sup> Ophthalmologists judged whether the patient had DR according to the results of the fundoscopic examination and guidelines. In the study, the results were reported as either positive or negative (DR or NDR), and the patients were divided into two groups (DR group and NDR group). Non-diabetic retinopathy here included a normal fundus and other retinopathy that may be caused by other causes (non-diabetic) such as fundus arteriosclerosis.

---

## Statistical analysis

Descriptive analysis was used to illustrate the basic demographic characteristics. For continuous variables, a one-sample Kolmogorov-Smirnov normality test was used to check the normality of the distribution of such variables. Once normal distribution and homogeneity of variance were satisfied, values were represented by the  $\bar{x} \pm SD$  and Student's t-test was used. For categorical variables, a  $\chi^2$  test was performed. The occurrence of DR was identified as the dependent variable, and the related factors (sex, hypertension, age at DM diagnosis, family history of diabetes, drinking history, HbA1c, BMI and smoking status) were listed as independent variables. To analyze the factors associated with DR and adjust for potential confounding effects, we examined the factors associated with DR using multivariable logistic regression analysis. All the analyses conducted using SPSS 16.0 software with  $p < 0.05$  (two-sided) indicated statistical significance.

## Patient and Public Involvement

Patients were not involved in setting the research questions or planning the study. Investigators did not know the identities of the study participants. In this study, the electronic data were obtained from the health records at the institution. All patient identifiers were removed before the analysis was conducted. There was no direct patient or public involvement.



---

## Results

### Characteristics of the study population

In this survey, 952 patients entered the study initially and 5 were excluded because their fundus could not be seen clearly. Finally, a total of 947 patients were enrolled in the study. Their average age was  $53.2 \pm 11.6$  years. The average HbA1c level was  $9.53 \pm 2.13\%$ . The average BMI of the patients was  $27.5 \pm 4.3$  kg/m<sup>2</sup>. A total of 430 patients had a history of smoking. The average smoking age was  $27.8 \pm 12.2$  years (2–60 years). They smoked  $21.8 \pm 12.3$  cigarettes per day. Baseline characteristics are shown in Table 1.

### Comparison of clinical data between the DR and NDR groups

A total of 755 patients (79.7%) were in the NDR group, and 192 patients were in the DR group. Among the patients in the DR group, there were 12 patients with PDR. The comparison of clinical data between the DR and NDR groups is shown in Table 2. There were no statistically significant differences between the two groups in sex, age, hypertension, family history of diabetes, drinking history and HbA1c. The BMI was significantly higher in NDR patients ( $27.7 \pm 4.2$  vs  $26.7 \pm 4.4$ ,  $p=0.004$ ). Smoking status was different between the two groups ( $\chi^2=6.350$ ,  $p=0.042$ ).

The occurrence of DR was identified as the dependent variable, and the related risk factors were listed as independent variables. Both of the variables were progressed through multivariate logistic regression analysis; age, BMI and smoking status were adjusted, as shown in Table 3.

Patients with BMI  $\geq 28$  kg/m<sup>2</sup> were less likely to have DR in newly diagnosed diabetic patients

(OR=0.592, p=0.004). The age of DM diagnosis was also statistically significant in the regression analysis (p=0.047). The incidence of DR in patients over 60 years who were diagnosed with diabetes was significantly lower than that in patients under 50 years (OR=0.596, p=0.024). The incidence of DR in severe smokers was significantly higher than that in nonsmokers (OR=1.664, p=0.043).

### **Did obesity have a protective effect on DR?**

Our study compared the age, HbA1c, smoking and drinking history, family history of DM and complications between the obese and non-obese patients, as shown in Table 4 (BMI  $\geq 28$  kg/m<sup>2</sup> vs BMI  $< 28$  kg/m<sup>2</sup>). There was no statistically significant difference between the two groups in sex, family history of DM, drinking history, smoking history and HbA1c. The age of obese diabetic patients was significantly lower than that of non-obese patients ( $50.4 \pm 12.4$  vs  $55.2 \pm 10.5$ , t=-6.184, p<0.001). Because the onset of T2DM was insidious, patients might have a long history before diagnosis.<sup>3</sup> BMI could be a possible confounding variable.

After adjustment for BMI and age, DR-related factors were further analyzed. First, the participants were divided into two groups according to whether the BMI was  $\geq 28$  kg/m<sup>2</sup>. The incidence of DR in patients with different smoking statuses was compared (Table 5). The incidence of DR in heavy smoking patients was significantly higher in obese patients. There was no significant difference in the incidence of DR with different smoking statuses among patients over 60 years (Table 5). Then after adjustment for age, multiple logistic regression analysis was used to analyze the related factors of DR (Table 6). When BMI was  $\geq 28$  kg/m<sup>2</sup>, heavy smoking was significantly associated with DR (OR=2.219, p=0.049), and there was a negative correlation

between DR and the age of diagnosis of diabetes at  $\geq 60$  years (OR=0.289, p=0.009).

**Table 1** Baseline characteristics of 947 participants with newly diagnosed T2DM.

| Items                      | n   | %    |
|----------------------------|-----|------|
| Sex                        |     |      |
| male                       | 566 | 59.8 |
| female                     | 381 | 40.2 |
| With family history of DM  | 580 | 61.2 |
| Age                        |     |      |
| < 50 years old             | 309 | 32.5 |
| $\geq 50$ , < 60 years old | 318 | 33.4 |
| $\geq 60$ years old        | 325 | 34.1 |
| With hypertension          | 498 | 52.6 |
| With drinking history      | 195 | 20.6 |
| Smoking status             |     |      |
| Non-smoking                | 517 | 54.6 |
| Light and moderate smoking | 212 | 22.4 |
| Heavy smoking              | 218 | 23.0 |

Abbreviations: DM, Diabetes mellitus.

**Table 2** Comparison of clinical data between DR and NDR groups

| Items                     |            | NDR<br>(n=755) | DR<br>(n=192) | t/ $\chi^2$        | P value |
|---------------------------|------------|----------------|---------------|--------------------|---------|
| Sex                       | Male       | 447(79.0%)     | 119(21.0%)    | 0.490 <sup>a</sup> | 0.510   |
|                           | Female     | 308(80.8%)     | 73(19.2%)     |                    |         |
| Age                       | years      | 53.3 ± 11.7    | 52.9 ± 11.1   | 0.350 <sup>b</sup> | 0.726   |
| Family history of<br>DM   | no         | 288(78.5%)     | 79(21.5%)     | 0.580 <sup>a</sup> | 0.456   |
|                           | yes        | 467(80.5%)     | 113(19.5%)    |                    |         |
| Drinking history          | no         | 608(80.9%)     | 144(19.1%)    | 2.863 <sup>a</sup> | 0.109   |
|                           | yes        | 147(75.4%)     | 48(24.6%)     |                    |         |
| Hypertension <sup>c</sup> | no         | 349(81.2%)     | 81(18.8%)     | 1.457 <sup>a</sup> | 0.265   |
|                           | yes        | 392(78.7%)     | 106(21.3%)    |                    |         |
| Age of DM<br>diagnosis    | < 50 years | 247(79.9%)     | 62 (20.1%)    | 2.382 <sup>a</sup> | 0.304   |

|                 |                            |             |             |                     |       |
|-----------------|----------------------------|-------------|-------------|---------------------|-------|
|                 | ≥50, < 60 years            | 243(77.1%)  | 72(22.9%)   |                     |       |
|                 | ≥60 years                  | 265(82.0%)  | 58(18.0%)   |                     |       |
| HbA1c           | %                          | 9.51 ± 2.13 | 9.60 ± 2.12 | -0.546 <sup>b</sup> | 0.585 |
| BMI             | kg/m <sup>2</sup>          | 27.7 ± 4.2  | 26.7 ± 4.4  | 2.921 <sup>b</sup>  | 0.004 |
| Smoking history | no                         | 424(82.0%)  | 93(18.0%)   | 3.682 <sup>b</sup>  | 0.062 |
|                 | yes                        | 331(77.0%)  | 99(23.0%)   |                     |       |
| Smoking status  | Non-smoking                | 424(82.0%)  | 93(18.0%)   | 6.350 <sup>a</sup>  | 0.042 |
|                 | Light and moderate smoking | 170(80.2%)  | 42(19.8%)   |                     |       |
|                 | Heavy smoking              | 161(73.9%)  | 57(26.1%)   |                     |       |

Note: <sup>a</sup> Chi-squared test, <sup>b</sup> Student's t test and <sup>c</sup>19 cases of patients with missing data. DR, diabetic retinopathy; NDR, non-diabetic retinopathy; HbA1c, hemoglobin A1c; BMI, body mass index; DM, diabetes mellitus. There was no statistically significant difference if p >0.05.

**Table 3** Analysis of related factors with DR, adjusted for age, BMI and smoking status.

| Factors | B     | SE    | Wald $\chi^2$ | P value | OR    | 95%CI       |
|---------|-------|-------|---------------|---------|-------|-------------|
| Sex     | 0.099 | 0.228 | 0.190         | 0.663   | 1.104 | 0.707–1.726 |

|                                                                 |                            |        |       |        |       |             |             |
|-----------------------------------------------------------------|----------------------------|--------|-------|--------|-------|-------------|-------------|
| Hypertension                                                    | 0.252                      | 0.175  | 2.080 | 0.149  | 1.287 | 0.914–1.812 |             |
| Drinking history                                                | 0.131                      | 0.222  | 0.351 | 0.554  | 1.140 | 0.739–1.761 |             |
| HbA1c                                                           | 0.006                      | 0.038  | 0.022 | 0.882  | 1.006 | 0.934–1.083 |             |
| BMI ( $\geq 28$ kg/m <sup>2</sup> vs $< 28$ kg/m <sup>2</sup> ) | -0.524                     | 0.183  | 8.230 | 0.004  | 0.592 | 0.414–0.847 |             |
| Family history of DM                                            | -0.162                     | 0.173  | 0.877 | 0.349  | 0.850 | 0.606–1.194 |             |
| Age of DM diagnosis (years)                                     |                            |        | 6.126 | 0.047  |       |             |             |
|                                                                 | <50                        | -      | -     | -      | 1     | -           |             |
|                                                                 | 50~60                      | -0.092 | 0.216 | 0.183  | 0.669 | 0.597–1.393 |             |
|                                                                 | $\geq 60$                  | -0.518 | 0.229 | 5.124  | 0.024 | 0.381–0.933 |             |
| Smoking status                                                  |                            |        | 4.658 | 0.097  |       |             |             |
|                                                                 | Non smoking                | -      | -     | -      | 1     | -           |             |
|                                                                 | Light and moderate smoking | 0.097  | 0.252 | -0.149 | 0.700 | 1.102       | 0.673–1.806 |
|                                                                 | Heavy smoking              | 0.509  | 0.251 | 4.104  | 0.043 | 1.664       | 1.017–2.724 |
| Constant                                                        | -1.407                     | 0.574  | 6.016 | 0.014  | 0.245 |             |             |

Abbreviations: DR, diabetic retinopathy; HbA1c, hemoglobin A1c; BMI, Body mass index; DM, diabetes mellitus.

**Table 4** Comparison of clinical data between patients (BMI  $\geq 28$  kg/m<sup>2</sup> vs BMI  $< 28$  kg/m<sup>2</sup>)

| Items                            |        | BMI $\geq 28$ kg/m <sup>2</sup><br>(n=379) | BMI $< 28$ kg/m <sup>2</sup><br>(n=573) | t/ $\chi^2$         | P value |
|----------------------------------|--------|--------------------------------------------|-----------------------------------------|---------------------|---------|
| Sex (n, %)                       | Male   | 230(60.7%)                                 | 338(59.0%)                              | 0.273 <sup>a</sup>  | 0.637   |
|                                  | Female | 149(39.3.8%)                               | 235(41.0%)                              |                     |         |
| Age                              | years  | 50.4 $\pm$ 12.4                            | 55.2 $\pm$ 10.5                         | -6.184 <sup>b</sup> | <0.001  |
| Family history of DM<br>(n, %)   | no     | 141(37.2%)                                 | 228(39.8%)                              | 0.643 <sup>a</sup>  | 0.455   |
|                                  | yes    | 238(62.8%)                                 | 345(60.2%)                              |                     |         |
| Drinking history (n, %)          | no     | 305(80.5%)                                 | 452(78.9%)                              | 0.567 <sup>a</sup>  | 0.305   |
|                                  | yes    | 74(19.5%)                                  | 121(21.1%)                              |                     |         |
| Hypertension <sup>c</sup> (n, %) | no     | 148(40.1%)                                 | 284(50.4%)                              | 9.419 <sup>a</sup>  | 0.002   |
|                                  | yes    | 221(59.9%)                                 | 280(49.6%)                              |                     |         |
| HbA1c                            | %      | 9.38 $\pm$ 2.10                            | 9.63 $\pm$ 2.30                         | -1.744 <sup>b</sup> | 0.082   |
| Smoking history (n, %)           | no     | 217(57.3%)                                 | 303(52.9%)                              | 1.763 <sup>b</sup>  | 0.206   |
|                                  | yes    | 162(42.7%)                                 | 270(47.1%)                              |                     |         |

Note: <sup>a</sup> Chi-squared test, <sup>b</sup> Student's t test and <sup>c</sup> 19 cases of patients with missing data. There was no statistically significant difference if  $p > 0.05$ . HbA1c, hemoglobin A1c; BMI, Body mass index; DM, diabetes mellitus.

**Table 5** The incidence of DR in patients with different smoking statuses

| Items                     | Non-smoking<br>(n, %) | Light and moderate<br>smoking (n, %) | Heavy smoking<br>(n, %) | $\chi^2$  | P value |       |
|---------------------------|-----------------------|--------------------------------------|-------------------------|-----------|---------|-------|
| BMI I(kg/m <sup>2</sup> ) | ≥28                   | 27(12.4%)                            | 11(12.1%)               | 20(28.2%) | 11.163  | 0.004 |
|                           | <28                   | 66(22.0%)                            | 31(25.6%)               | 37(25.2%) | 0.901   | 0.637 |
| Age(years)                | <50                   | 37(21.8%)                            | 15(13.8%)               | 10(33.3%) | 6.300   | 0.043 |
|                           | ≥50,                  | 23(14.6%)                            | 17(35.4%)               | 32(29.4%) | 13.080  | 0.001 |
|                           | <60                   |                                      |                         |           |         |       |
|                           | ≥60                   | 33(17.5%)                            | 10(18.2%)               | 15(19.0%) | 0.090   | 0.956 |

Abbreviations: DR, diabetic retinopathy; BMI, body mass index.

**Table 6** Logistic regression analysis of related factors for DR (BMI <28 kg/m<sup>2</sup>, ≥28 kg/m<sup>2</sup>)

| Factors                       | B     | SE    | Wald     | P value | OR    | 95%CI      |
|-------------------------------|-------|-------|----------|---------|-------|------------|
|                               |       |       | $\chi^2$ |         |       |            |
| BMI <28 kg/m <sup>2</sup> Sex | 0.168 | 0.290 | 0.334    | 0.563   | 1.183 | 0.670–2.08 |



|                            |        |       |       |        |       |            |   |
|----------------------------|--------|-------|-------|--------|-------|------------|---|
| Hypertension               | 0.138  | 0.213 | 0.421 | 0.517  | 1.148 | 0.756–1.74 | 4 |
| Drinking history           | -0.015 | 0.279 | 0.003 | 0.958  | 0.986 | 0.571–1.70 | 1 |
| HbA1c                      | 0.001  | 0.045 | 0.000 | 0.9983 | 1.001 | 0.917–1.09 | 3 |
| Family history of DM       | -0.406 | 0.208 | 3.815 | 0.051  | 0.666 | 0.443–1.00 | 1 |
| Age (years)                |        |       | 1.535 | 0.464  |       |            |   |
| <50                        | -      | -     | -     | -      | 1     | -          |   |
| 50~60                      | 0.071  | 0.279 | 0.065 | 0.799  | 1.074 | 0.621–1.85 | 6 |
| ≥60                        | -0.221 | 0.281 | 0.621 | 0.431  | 0.801 | 0.462–1.39 | 0 |
| Smoking status             |        |       | 1.595 | 0.450  |       |            |   |
| Non smoking                | -      | -     | -     | -      | 1     | -          |   |
| Light and moderate smoking | 0.380  | 0.328 | 1.345 | 0.246  | 1.463 | 0.769–2.78 | 1 |

|  |                                 |                      |        |       |       |       |       |            |
|--|---------------------------------|----------------------|--------|-------|-------|-------|-------|------------|
|  |                                 |                      |        |       |       |       |       |            |
|  |                                 |                      |        |       |       |       |       |            |
|  |                                 |                      |        |       |       |       |       |            |
|  |                                 | Heavy smoking        | 0.342  | 0.321 | 1.136 | 0.286 | 1.408 | 0.751–2.64 |
|  |                                 |                      |        |       |       |       |       | 0          |
|  |                                 |                      |        |       |       |       |       |            |
|  | BMI $\geq$ 28 kg/m <sup>2</sup> | Sex                  | 0.040  | 0.392 | 0.010 | 0.919 | 1.040 | 0.483–2.24 |
|  |                                 |                      |        |       |       |       |       | 2          |
|  |                                 | Hypertension         | 0.400  | 0.318 | 1.578 | 0.209 | 1.492 | 0.799–2.78 |
|  |                                 |                      |        |       |       |       |       | 4          |
|  |                                 | Drinking history     | 0.593  | 0.384 | 2.378 | 0.123 | 1.809 | 0.852–3.84 |
|  |                                 |                      |        |       |       |       |       | 2          |
|  |                                 | HbA1c                | 0.000  | 0.071 | 0.000 | 0.995 | 1.000 | 0.869–1.15 |
|  |                                 |                      |        |       |       |       |       | 0          |
|  |                                 | Family history of DM | 0.398  | 0.340 | 1.374 | 0.241 | 1.489 | 0.765–2.89 |
|  |                                 |                      |        |       |       |       |       | 8          |
|  |                                 | Age (years)          |        |       | 7.195 | 0.027 |       |            |
|  |                                 | <50                  | -      | -     | -     | -     | 1     | -          |
|  |                                 | 50~60                | -0.149 | 0.358 | 0.173 | 0.678 | 0.862 | 0.427–1.73 |
|  |                                 |                      |        |       |       |       |       | 9          |
|  |                                 | $\geq$ 60            | -1.241 | 0.474 | 6.838 | 0.009 | 0.289 | 0.114–0.73 |
|  |                                 |                      |        |       |       |       |       | 3          |

---

|                            |        |       |       |       |       |            |   |
|----------------------------|--------|-------|-------|-------|-------|------------|---|
| Smoking status             |        |       |       | 6.920 | 0.031 |            |   |
| Non smoking                | -      | -     | -     | -     | -     | 1          | - |
| Light and moderate smoking | -0.330 | 0.435 | 0.573 | 0.449 | 0.719 | 0.306–1.68 | 8 |
| Heavy smoking              | 0.797  | 0.404 | 3.884 | 0.049 | 2.219 | 1.004–4.90 | 3 |

---

Abbreviations: DR, diabetic retinopathy; HbA1c, hemoglobin A1c; BMI, body mass index; DM, diabetes mellitus.

## Discussion

### Summary of results

In our study, among the newly diagnosed T2DM patients, 20.3% presented with DR. After analyzing the related factors of DR, the present study found that obese patients may have a lower incidence of DR (OR=0.592, p=0.004). Many researchers have shown that duration of DM, blood glucose, blood pressure and blood lipids are important risk factors for DR.<sup>16-18</sup> The duration is the most important factor.<sup>19</sup> The subjects of the present study were all newly diagnosed T2DM patients. Our study showed that DR was related to BMI, smoking status and age of DM diagnosis. To the best of our knowledge, the present study is the first that was designed to investigate the correlation

1  
2  
3  
4 between smoking level and DR in newly diagnosed patients with T2DM. The results of the study  
5  
6 suggested that heavy smoking was associated with DR in obese ( $\text{BMI} \geq 28 \text{ kg/m}^2$ ) newly diagnosed  
7  
8 T2DM patients ( $\text{OR}=2.219$ ,  $p=0.049$ ), and there was a negative correlation between DR and the  
9  
10 age of diagnosis of diabetes  $\geq 60$  years ( $\text{OR}=0.289$ ,  $p=0.009$ ). Those correlations did not exist in  
11  
12 non-obese ( $\text{BMI} < 28 \text{ kg/m}^2$ ) patients.  
13  
14  
15

### 16 17 **The relationship between BMI and DR**

18  
19  
20 In our study, DR was negatively correlated with BMI. This was not consistent with other research  
21  
22 results. Gray et al. followed up with 14, 657 diabetic patients for an average of 6.68 years and  
23  
24 found that increased risk of DR was associated with higher BMI.<sup>20</sup> It has also been reported that  
25  
26 BMI was not correlated or even negatively correlated with DR.<sup>21</sup> The subjects in our study had  
27  
28 newly diagnosed T2DM. The average age of newly T2DM patients with obesity ( $\text{BMI} \geq 28 \text{ kg/m}^2$ )  
29  
30 was  $50.4 \pm 12.4$  years, while that of patients without obesity was  $55.2 \pm 10.5$  years. The former  
31  
32 was significantly lower than the latter ( $t=-6.184$ ,  $p<0.001$ ). As the onset of T2DM is insidious,  
33  
34 patients may have had a long history before diagnosis.<sup>3</sup> Based on the usual clinical experience  
35  
36 and their different diagnostic ages, our study suggested that the diagnostic age of T2DM patients  
37  
38 with obesity might be closer to the real age of onset. Perhaps because non-obese patients might  
39  
40 be confused with more complex diabetic course factors, we did not find any factors in the  
41  
42 analysis of the related factors of DR in these patients. In conclusion, we do not think that a high  
43  
44 BMI is a protective related factor for DR. It is very likely that there are confounding factors, such  
45  
46 as an unobserved course of T2DM.  
47  
48  
49  
50  
51  
52  
53  
54  
55  
56

### 57 **The relationship between smoking and DR**

1  
2  
3  
4 Cigarette smoking is a well-known risk factor for many chronic diseases, including cardiovascular  
5  
6 diseases and various malignancies.<sup>6</sup> Many researchers have reported the negative effects of  
7  
8 smoking on DM.<sup>22-23</sup> A 14-year prospective cohort study in South Korea showed that the risk of  
9  
10 DM among men and women who smoked 20 or more cigarettes a day was 1.55 times higher  
11  
12 than that in non-smokers.<sup>7</sup> Cigarette smoking is independently associated with the incidence of  
13  
14 T2DM.<sup>24</sup> Although the mechanisms involved are not clear yet. Smoking is associated with insulin  
15  
16 resistance, inflammation and dyslipidemia.<sup>25-26</sup> When BMI was  $\geq 28$  kg/m<sup>2</sup>, we found that the  
17  
18 incidence of DR was 12.4% in non-smokers, 12.1% in light and moderate smokers and 28.2% in  
19  
20 heavy smokers ( $\chi^2=11.163$ ,  $p=0.004$ ). Some studies have reported that no association was found  
21  
22 between smoking and DR in patients with T2DM.<sup>27-28</sup> Smoking cessation is one of the important  
23  
24 targets for diabetes control and the prevention of chronic diabetes complications.<sup>29-30</sup>  
25  
26  
27  
28  
29  
30  
31  
32

33 Studies have shown that cigarette smoking impairs nitric oxide-mediated endothelial function  
34  
35 via increased generation of superoxide anions, which may increase the risk of DR in diabetic  
36  
37 patients and could cause eye tissue ischemia, eye tissue hypoxia, retinal arteriosclerosis and a  
38  
39 decrease in choroidal blood flow, eventually leading to retinal ischemia.<sup>30-31</sup> When BMI was  $\geq 28$   
40  
41 kg/m<sup>2</sup>, the present study showed that the incidence of DR was 28.2% in heavy smokers. Heavy  
42  
43 smoking was significantly associated with DR. Smoking may aggravate retinopathy damage by  
44  
45 increasing arteriosclerosis.<sup>32</sup> DR remains the leading cause of acquired blindness in working-age  
46  
47 adults.<sup>4</sup> While cutting-edge research in the field has identified many molecular, functional and  
48  
49 structural abnormalities, the exact molecular mechanism of this devastating disease remains  
50  
51 obscure.<sup>33</sup> A diabetic environment drives the dysfunction of the power generator of the cell and  
52  
53  
54  
55  
56  
57  
58  
59  
60

1  
2  
3  
4 disturbs homeostasis of the mitochondrial dynamic. Mitochondria appear to have a significant role  
5  
6 in the development of DR, and unraveling the mechanism responsible for their damage as well as  
7  
8 the role of epigenetic modifications in mitochondrial homeostasis should identify novel  
9  
10 therapeutic targets.<sup>33</sup> Further research is needed to determine whether smoking affects  
11  
12 mitochondrial DNA function.  
13  
14  
15  
16

17  
18 In the present study, DR was found in 20.3% of newly diagnosed T2DM patients. This was  
19  
20 consistent with other findings.<sup>3</sup> The study suggested that smoking may be an important related  
21  
22 factor for the occurrence of DR in newly diagnosed diabetic patients. Tyrberg M et al.  
23  
24 investigated 794 patients diagnosed with diabetes in 1987–1988 and found that smoking history  
25  
26 could increase the risk of DR during 9–17 years after diagnosis.<sup>34</sup> Because smoking behavior  
27  
28 occurred before the diagnosis of T2DM in this study, heavy smoking is very likely to be a risk  
29  
30 factor for DR.  
31  
32  
33  
34  
35

36  
37 When BMI was  $\geq 28$  kg/m<sup>2</sup>, there was a negative correlation between DR and the age of  
38  
39 diagnosis of diabetes  $\geq 60$  years (OR=0.289, p=0.009). Wong et al. investigated more than 1400  
40  
41 patients with T2DM and found that the risk of DR in young patients was significantly higher than  
42  
43 that in old patients.<sup>35</sup> After adjusting for factors such as the course of diabetes, the risk of DR was  
44  
45 increased twice in those with T2DM who were less than 45 years.<sup>35</sup> Our report agrees with other  
46  
47 studies. Age at onset of diabetes was strongly associated with an increasing number of  
48  
49 complications.<sup>36</sup> In other regions, studies that have looked at age of onset of diabetes have found  
50  
51 that early onset diabetes increases disease severity. Genetic determinants of diabetes are likely  
52  
53 to be more common in patients with early onset of diabetes.<sup>37</sup> This observation suggests that  
54  
55  
56  
57  
58  
59  
60

---

1  
2  
3  
4 patients with early onset of diabetes have a more aggressive disease and are prone to develop  
5  
6 more complications at an earlier age.<sup>38</sup>Delaying the age of diabetes might prevent the  
7  
8 occurrence of DR.  
9  
10

### 11 12 13 14 15 16 **Limitations of the study**

17  
18 The study was a single-center cross-sectional study. The results only showed a correlation  
19  
20 between smoking and DR. Prospective cohort studies are needed to confirm whether there is a  
21  
22 causal relationship between smoking and DR in newly diagnosed T2DM patients. Because of the  
23  
24 large number of newly diagnosed T2DM patients, we have set relatively wide exclusion criteria  
25  
26 for the population, which may affect external validity. Although our department is responsible  
27  
28 for the first diagnosis and identification of diabetes in Tianjin, it is still unable to achieve a timely  
29  
30 diagnosis for all those patients who newly develop diabetes. Because the patients are all from  
31  
32 Tianjin, China, the conclusion has regional limitations.  
33  
34  
35  
36  
37  
38  
39  
40  
41  
42  
43

### 44 **Conclusion**

45  
46  
47  
48  
49  
50  
51  
52  
53  
54  
55  
56  
57  
58  
59  
60

1  
2  
3  
4 The study found that heavy smoking and the age of T2DM diagnosis were related factors for the  
5  
6 occurrence of DR in newly diagnosed patients when BMI was  $\geq 28$  kg/m<sup>2</sup>. Although the subjects were  
7  
8 all newly diagnosed patients, it is known that the onset of T2DM is relatively insidious. It is of great  
9  
10 importance for people in populations at high-risk of diabetes mellitus to quit smoking. Delaying the age  
11  
12 of diabetes may prevent the occurrence of DR. Therefore, long-term cohort studies are needed to  
13  
14 elucidate the correlation.  
15  
16  
17  
18  
19

### 20 **Acknowledgments**

21  
22  
23 This work was supported by the National Key R&D Program of China (2018YFC1314000), Tianjin  
24  
25 Major Science and Technology Projects (17ZXMFSY00200) and Tianjin Science and Technology  
26  
27 Development Strategy Research Projects (18ZLZXZF00740).  
28  
29  
30

31  
32 **Competing interests:** None declared.  
33  
34

35 **Patient consent:** Obtained.  
36  
37

38 **Ethics approval:** This study was approved by the IRB of Tianjin 4th Central Hospital (2017-SZXL017)  
39  
40 and the Chinese Clinical Trial Registry (No. ChiCTR1900020728).  
41  
42  
43

44 **Provenance and peer review:** Not commissioned; externally peer reviewed.  
45  
46

47 **Contributors:** Zhaohu Hao wrote the manuscript. Xiao Huang was in charge of fundus  
48  
49 examinations. Yongzhang Qin was responsible for basic information collection. Fengshi Tian was  
50  
51 responsible for the statistical analysis of the data. Huanming Li was responsible for auditing the  
52  
53 fundus images and reports. Rong Xu was responsible for maintaining patient activities. Baocheng  
54  
55 Chang proposed the necessity and design of the study. Hailin Shao was the director of our  
56  
57  
58  
59  
60



department and also provided project support for the research.

**Data sharing statement:** Data are available upon reasonable request (by mail keddyhm@163.com.).

### References:

1. American Diabetes Association. (2017). Classification and diagnosis of diabetes. *Diabetes Care*, 40(suppl 1):S11-S24.
2. Wang L, Gao P, Zhang M, et al. Prevalence and Ethnic Pattern of Diabetes and Prediabetes in China in 2013. *JAMA* 2017;317(24):2515-2523.
3. Yau J W Y, Rogers S, Kawasaki R. Global prevalence and major risk factors of diabetic retinopathy. *Diabetes Care* 2012; 35(3):556-564.
4. Pang C, Jia L, Jiang S, et al. Determination of diabetic retinopathy prevalence and associated risk factors in Chinese diabetic and pre-diabetic subjects: Shanghai diabetic complications study. *Diabetes Metab Res Rev* 2012;28(3):276-283.
5. Mellitus, E.C.O.O. D. . (2002). American diabetes association: clinical practice recommendations 2002. *Diabetes Care*, 25 Suppl 1, S1-147.
6. GBD 2015 Risk Factors Collaborators. (2016). Global, regional, and national comparative risk assessment of 79 behavioural, environmental and occupational, and metabolic risks or clusters of risks, 1990-2015: a systematic analysis for the Global Burden of Disease Study 2015. *Lancet*, 388(10053):1659-1724.
7. Jee S H, Foong A W, Hur N W, et al. Smoking and Risk for Diabetes Incidence and Mortality in Korean Men and Women. *Diabetes Care* 2010; 33(12):2567-2572.
8. Ohkuma T, Nakamura U, Iwase M, et al. Effects of smoking and its cessation on creatinine- and cystatin C-based estimated glomerular filtration rates and albuminuria in male patients with type 2 diabetes mellitus: the Fukuoka Diabetes Registry[J]. *Hypertension Research*, 2016;39(10):744-751.
9. Mose SE, Klein R, Klein BE. Cigarette smoking and ten-year progression of diabetic retinopathy[J]. *Ophthalmology*, 1996, 103(3):1438-1442.
10. Li Y, Wang J, Qu B, et al. Prevalence and risk factors of diabetic retinopathy in hospital patients[J]. *Natl Med J China*, 2018, 98(6):440-444 (in Chinese).
11. General Assembly of the World Medical Association. (2014). World Medical Association Declaration of Helsinki: ethical principles for medical research involving human subjects. *The Journal of the American College of Dentists*, 81:14-18.
12. Xu Y, Wang L, He J, et al. Prevalence and Control of Diabetes in Chinese Adults. *JAMA* 2013; 310(9):948-959.

- 
- 13.Chen CM, Kong LZ. The guideline for prevention and control of overweight and obesity in Chinese adults[M]. Beijing:People' s Medical Publishing House,2006(in Chinese).
- 14.World Health Organisation. Guidelines for controlling and monitoring the tobacco epidemic. Genva:Tobacco or Health Programme,WHO,1997.
- 15.Romero P , Sagarra R, Ferrer J, et al. The incorporation of family physicians in the assessment of diabetic retinopathy by non-mydratiac fundus camera. *Diabetes Res Clin Pract* 2010;88(2), 0-188.
- 16.Van Leiden H A , Dekker J M , Moll A C , et al. Blood Pressure, Lipids, and Obesity Are Associated With Retinopathy: The Hoorn Study. *Diabetes Care* 2002; 25(8):1320-1325.
- 17.Kumari N, Bhargava M, Nguyen DQ, et al. Six-year incidence and progression of diabetic retinopathy in Indian adults: the Singapore Indian Eye study.*Br J Ophthalmol* 2019;0:1-8.
- 18.Kawasaki R , Kitano S , Sato Y , et al. Factors associated with non-proliferative diabetic retinopathy in patients with type 1 and type 2 diabetes: the Japan Diabetes Complication and its Prevention prospective study (JDCP study 4). *Diabetology International* 2019;10:3-11.
- 19.Cohen O , Norymberg K , Neumann E , et al. Complication-Free Duration and the Risk of Development of Retinopathy in Elderly Diabetic Patients[J]. *Archives of Internal Medicine*, 1998, 158(6):641-644.
- 20.Gray N , Picone G , Sloan F , et al. Relation between BMI and Diabetes Mellitus and Its Complications among US Older Adults. *Southern Medical Journal*, 2015, 108(1):29-36.
- 21.Rooney D , Lye W K , Tan G , et al. Body mass index and retinopathy in Asian populations with diabetes mellitus. *Acta Diabetologica*, 2015, 52(1):73-80.
- 22.Kim S , Jee S , Nam J , et al. Do early onset and pack-years of smoking increase risk of type II diabetes?. *BMC Public Health* 2014;14(1):178.
- 23.Pan A, Wang Y, Talaei M,et al. Relation of active, passive, and quitting smoking with incident type 2 diabetes: a systematic review and meta-analysis. *The Lancet Diabetes & Endocrinology* 2015;3(12):958-967.
- 24.Sung Y T , Hsiao C T , Chang I J , et al. Smoking Cessation Carries a Short-Term Rising Risk for Newly Diagnosed Diabetes Mellitus Independently of Weight Gain: A 6-Year Retrospective Cohort Study. *Journal of Diabetes Research* 2016; 2016:1-7.
- 25.Ah C S. Smoking and Type 2 Diabetes Mellitus. *Diabetes & Metabolism Journal* 2012; 36(6):399-403.
- 26.Hilawe E H , Yatsuya H , Li Y , et al. Smoking and Diabetes: Is the Association Mediated by Adiponectin, Leptin, or C-reactive Protein?. *Journal of Epidemiology* 2015;25(2):99-109.
- 27.Moss S E , Klein R , Klein B E K . Cigarette Smoking and Ten-year Progression of Diabetic Retinopathy. *Ophthalmology* 1996;103(9):1438-1442.
- 28.Stratton I M , Kohner E M , Aldington S J , et al. UKPDS 50: Risk factors for incidence and progression of retinopathy in Type II diabetes over 6 years from diagnosis. *Diabetologia* 2001; 44(2):156-163.

- 
- 1  
2  
3 29. Tsuneaki O, Taiji N, Akitoshi Y. Effects of Habitual Cigarette Smoking on Retinal Circulation in Patients With  
4 Type 2 Diabetes. *Investigative Ophthalmology & Visual Science* 2016; 57(3):1345-1351.  
5  
6  
7 30. Aggarwal S, Khandelwal D, Dutta D, et al. (2019) Diabetes and Smoking: The Burden of Evidence. In: Rodriguez-  
8 Saldana J. (eds) *The Diabetes Textbook*. Springer, Cham.  
9  
10 31. Jaimes E A, Demaster E G, Tian R X, et al. Stable Compounds of Cigarette Smoke Induce Endothelial Superoxide  
11 Anion Production via NADPH Oxidase Activation. *Arterioscler Thromb Vasc Biol* 2004; 24(6):1031-1036.  
12  
13 32. Zhang X, Lim SC, Tavintharan S, et al. Association of central arterial stiffness with the presence and severity of  
14 diabetic retinopathy in Asians with type 2 diabetes. *Diab Vasc Dis Res* 2019;3:1-8.  
15  
16 33. Kowluru R A. Mitochondrial Stability in Diabetic Retinopathy: Lessons Learned From Epigenetics. *Diabetes* 2019;  
17 68(2):241-247.  
18  
19 34. Tyrberg M, Nyström L, Arnqvist H J, et al. Overweight, hyperglycemia and tobacco use are modifiable risk  
20 factors for onset of retinopathy 9 and 17, years after the diagnosis of diabetes- A retrospective observational  
21 nation-wide cohort study. *Diabetes Research and Clinical Practice* 2017;133:21-29.  
22  
23 35. Wong J, Molyneaux L, Constantino M, et al. Timing Is Everything: Age of Onset Influences Long-Term  
24 Retinopathy Risk in Type 2 Diabetes, Independent of Traditional Risk Factors[J]. *Diabetes Care*, 2008, 31(10):1985-  
25 1990.  
26  
27 36. Sohaila C, Patrick M, Mahmoud Z, et al. Risk Factors for Microvascular Complications of Diabetes in a High-  
28 Risk Middle East Population[J]. *Journal of Diabetes Research*, 2018, 2018:1-7.  
29  
30 37. Song S H, Hardisty C A. Early onset type 2 diabetes mellitus: A harbinger for complications in later years –  
31 Clinical observation from a secondary care cohort[J]. *QJM: monthly journal of the Association of Physicians*, 2009,  
32 102(11):799-806.  
33  
34 38. Zou W, Ni L, Lu Q, et al. Diabetes Onset at 31–45 Years of Age is Associated with an Increased Risk of Diabetic  
35 Retinopathy in Type 2 Diabetes[J]. *Scientific Reports*, 2016, 6(1):38113.  
36  
37  
38  
39  
40  
41  
42  
43  
44  
45  
46  
47  
48  
49  
50  
51  
52  
53  
54  
55  
56  
57  
58  
59  
60
